# Supplementary material for: Chemoselective bicyclobutane-based mass spectrometric detection of biological thiols uncovers human and bacterial metabolites
Source: Royal Society of Chemistry journal article supplement (doi:10.1039/d3sc00224a), 2023-01-01

## SUPPLEMENTARY INFORMATION

### **Chemoselective bicyclobutane-based mass spectrometric detection of biological thiols uncovers human and bacterial metabolites**

Amanpreet Kaur,<sup>a</sup> Weifeng Lin,<sup>a</sup> Vladyslav Dovhalyuk,<sup>a</sup> Léna Driutti,<sup>a</sup> Maria Letizia Di Martino,<sup>b</sup> Miroslav Vujasinovic,<sup>c</sup> J.-Matthias Löhr,<sup>c,d</sup> Mikael E. Sellin,<sup>b</sup> and Daniel Globisch<sup>\*a</sup>

<sup>a</sup> Department of Chemistry - BMC, Science for Life Laboratory, Uppsala University, 75124 Uppsala, Sweden

<sup>b</sup> Department of Medical Biochemistry and Microbiology, Science for Life Laboratory, Uppsala University, 75123 Uppsala, Sweden

<sup>c</sup> Department for Digestive Diseases, Karolinska University Hospital, Stockholm, Sweden

<sup>d</sup> Department of Clinical Science, Intervention and Technology (CLINTEC), Karolinska Institute, Stockholm, Sweden

## Table of Contents

|                                                                                                                                                                            |    |
|----------------------------------------------------------------------------------------------------------------------------------------------------------------------------|----|
| <b>1. Supporting Figures and Supporting Scheme</b> .....                                                                                                                   | 4  |
| <b>Figure S1.</b> Extracted ion chromatograms of the Boc-protected thiol conjugates <b>TCP1- TCP2, TCP6, TCP8- TCP12, TCP15- TCP17, TCP17, TCP19- TCP20</b> .....          | 4  |
| <b>Figure S2.</b> Extracted ion chromatograms of the thiol conjugates <b>TC1-TC20</b> .....                                                                                | 6  |
| <b>Figure S3.</b> Extracted ion chromatograms of the lipoic acid conjugates <b>TCLA1</b> and <b>TCLA2</b> .....                                                            | 7  |
| <b>Figure S4.</b> Time-based NMR monitoring of the conversion rate of intermediate <b>11</b> with <i>N</i> -acetylcysteamine. ....                                         | 7  |
| <b>Figure S5.</b> Conversion rate of thiol capture based on integration of NMR experiment in Figure S4.8                                                                   |    |
| <b>Figure S6.</b> Extracted ion chromatograms of the conjugates detected in the chemoselectivity test demonstrating selectivity for thiols.....                            | 8  |
| <b>Figure S7.</b> Extracted ion chromatograms of the conjugates detected in the chemoselectivity test using iodoacetamide.....                                             | 9  |
| <b>Figure S8.</b> Extracted ion chromatograms of thiol conjugates before and after the stability test. ....                                                                | 10 |
| <b>Figure S9.</b> Extracted ion chromatograms of the captured cysteamine conjugate ( <b>TC3</b> ) and pantetheine ( <b>TC14</b> ), .....                                   | 11 |
| <b>Figure S10.</b> Extracted ion chromatograms of the synthetic cysteine persulfide conjugate <b>TC21</b> captured using probe <b>A</b> . ....                             | 11 |
| <b>Figure S11.</b> <b>A)</b> Heatmap of oxidative stress comparison experiment in <i>E. coli</i> ; <b>B)</b> Volcano plot of oxidative stress comparison. ....             | 12 |
| <b>Scheme S1.</b> Synthesis of standard lipoic acid probe conjugates <b>TCLA1</b> and <b>TCLA2</b> for the LC-MS based analysis. ....                                      | 13 |
| <b>2. Supporting Tables</b> .....                                                                                                                                          | 14 |
| <b>Table S1.</b> Features of thiol-containing metabolites in the human plasma.....                                                                                         | 14 |
| <b>Table S2.</b> Features of thiol-containing metabolites in the pooled human feces.....                                                                                   | 16 |
| <b>Table S3.</b> Features only detected in the control samples compared to the oxidative stress sample. ....                                                               | 17 |
| <b>Table S4.</b> Features only detected in the oxidative stress sample.....                                                                                                | 17 |
| <b>Table S5.</b> Semi-quantitative analysis of GSH in the comparison between control samples and oxidative stress samples through comparison of an internal standard. .... | 18 |
| <b>Table S6.</b> Detected Top100 features from bacteria lysates with intensities.....                                                                                      | 19 |
| <b>Table S7.</b> Metadata of patients for the pooled fecal and plasma sample. ....                                                                                         | 22 |
| <b>3. General</b> .....                                                                                                                                                    | 23 |
| <b>4. Synthetic procedures</b> .....                                                                                                                                       | 24 |
| <i>Preparation of compound 5</i> .....                                                                                                                                     | 24 |
| <i>Preparation of compound 6</i> .....                                                                                                                                     | 24 |
| <i>Preparation of compound 7</i> .....                                                                                                                                     | 25 |
| <i>Preparation of compound 8</i> .....                                                                                                                                     | 26 |

|                                                                                                             |    |
|-------------------------------------------------------------------------------------------------------------|----|
| Preparation of compound <b>10</b> .....                                                                     | 26 |
| <i>Preparation of compound 9</i> .....                                                                      | 27 |
| <i>Preparation of compound 11</i> .....                                                                     | 28 |
| <i>Preparation of compound 12</i> .....                                                                     | 29 |
| <i>Preparation of compound 2</i> .....                                                                      | 30 |
| <i>Preparation of compound 1a</i> .....                                                                     | 31 |
| <i>Preparation of compound 1</i> .....                                                                      | 32 |
| <i>Synthesis of reduced lipoic acid</i> .....                                                               | 32 |
| <i>Preparation of 1-butanethiol-probe conjugate <b>TC11</b> for the LOD determination</i> .....             | 33 |
| <i>Preparation of Boc-protected cysteine persulfide conjugate <b>TCP21</b> for the LC-MS analysis</i> ..... | 34 |
| <b>5. Methods</b> .....                                                                                     | 35 |
| <b>5.1 Preparation of immobilized probe A</b> .....                                                         | 35 |
| <b>5.2 Preparation of LC-MS standard of TC21</b> .....                                                      | 35 |
| <b>5.3 Preparation of fecal metabolite extracts</b> .....                                                   | 36 |
| <b>5.4 Preparation of plasma metabolite extracts</b> .....                                                  | 36 |
| <b>5.5 Treatment of fecal metabolite extract</b> .....                                                      | 36 |
| <b>5.6 Treatment of plasma metabolite extract</b> .....                                                     | 36 |
| <b>5.7 Preparation of bacterial strain lysates and supernatants</b> .....                                   | 37 |
| <b>5.8 Cleavage of the bead-bound probe A</b> .....                                                         | 37 |
| <b>5.9 Preparation of probe-conjugated thio-intermediates TCP1-TCP20</b> .....                              | 38 |
| <b>5.10 Preparation of probe-conjugated standards TC1-TC20</b> .....                                        | 38 |
| <b>5.11 Stability of thiol conjugates under Pd(0) conditions</b> .....                                      | 38 |
| <b>5.12 Chemoselectivity test</b> .....                                                                     | 38 |
| <b>5.13 LOD experiment</b> .....                                                                            | 38 |
| <b>6. Ethical approval</b> .....                                                                            | 39 |
| <b>7. References</b> .....                                                                                  | 40 |
| <b>8. NMR spectra</b> .....                                                                                 | 40 |

## 1. Supporting Figures and Supporting Scheme

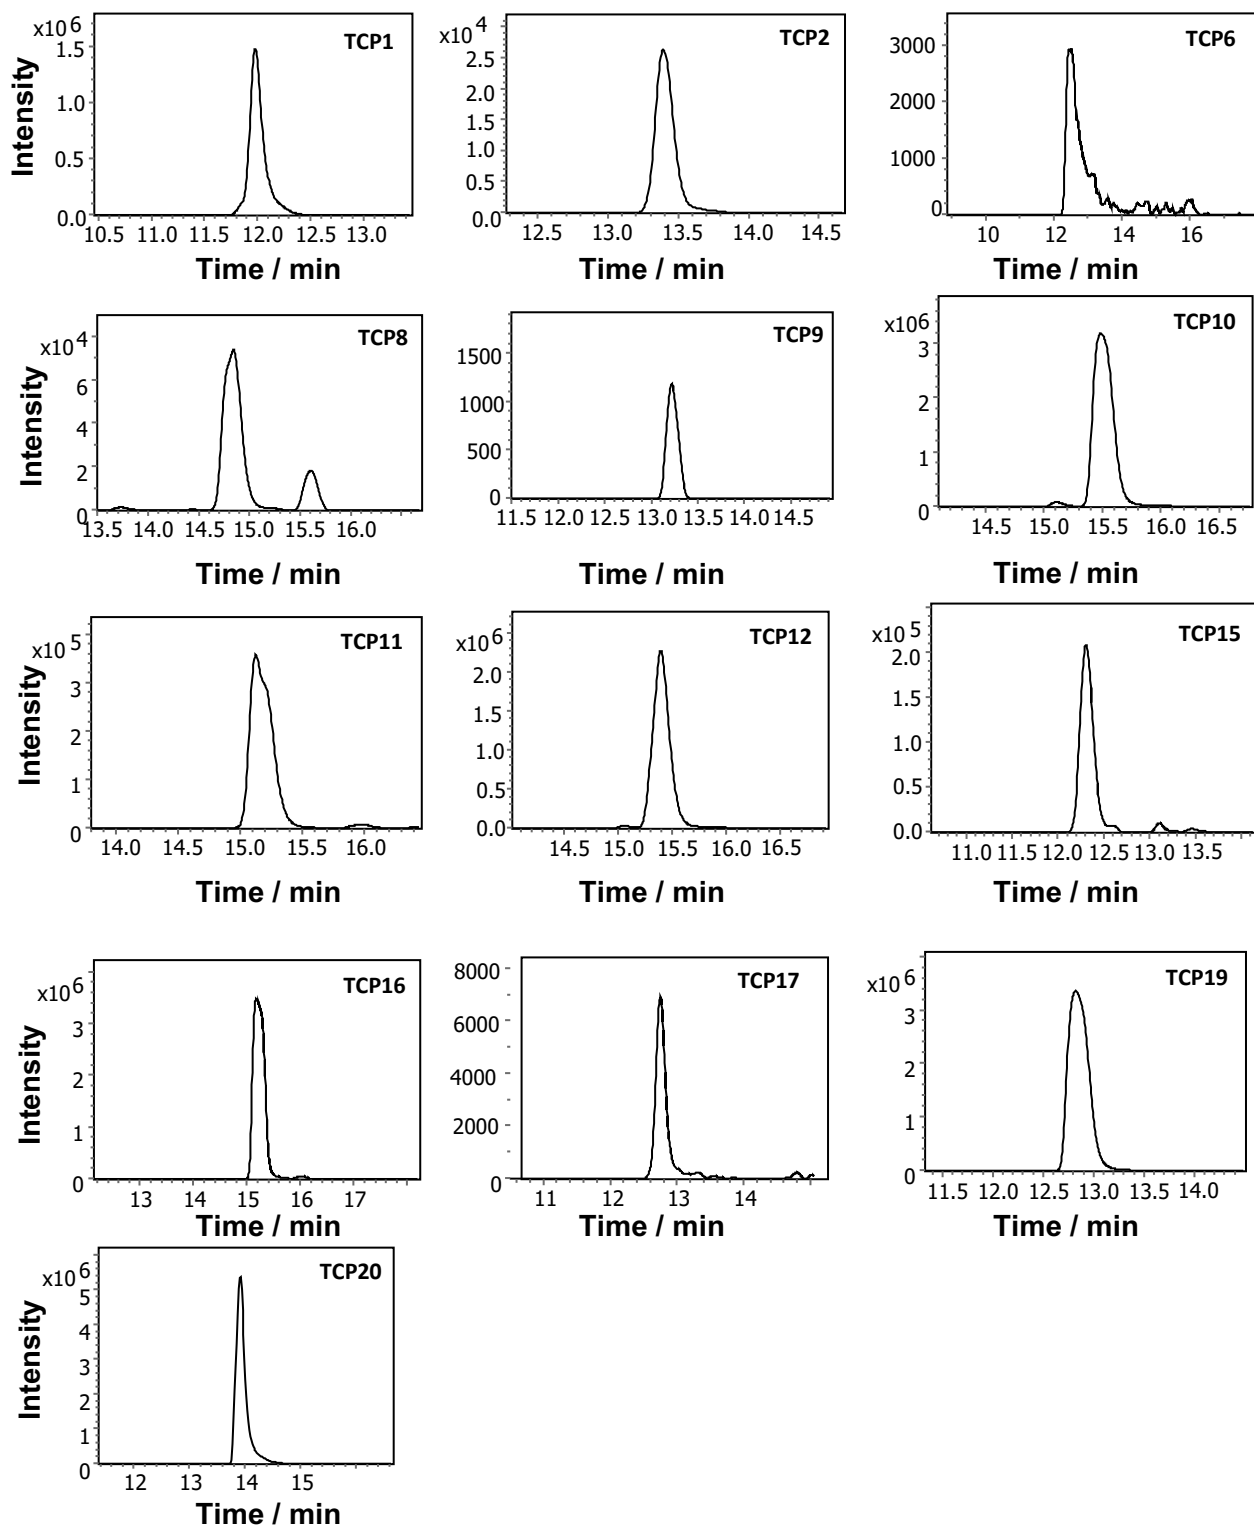

**Figure S1.** Extracted ion chromatograms of the Boc-protected thiol conjugates **TCP1- TCP2**, **TCP6**, **TCP8- TCP12**, **TCP15- TCP17**, **TCP17**, **TCP19- TCP20**.

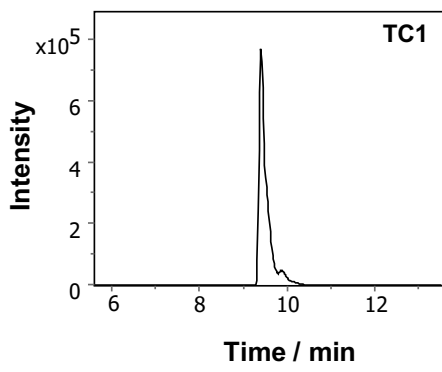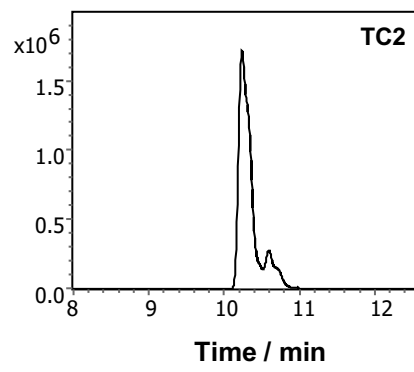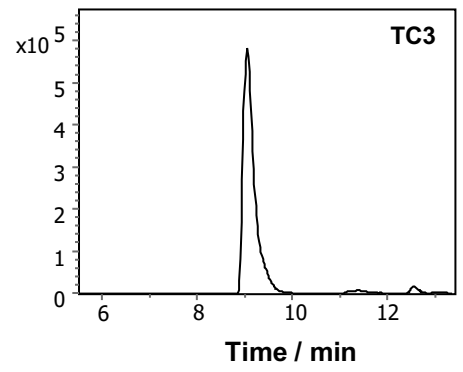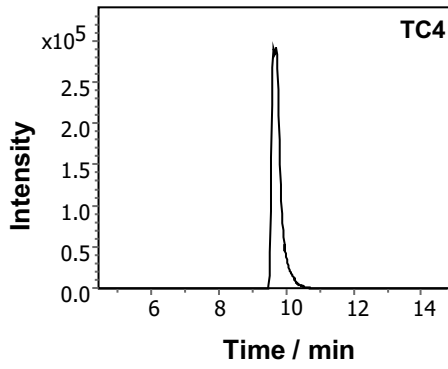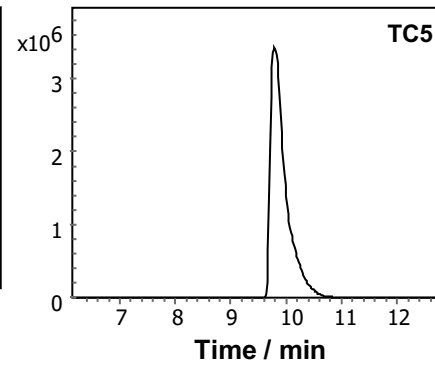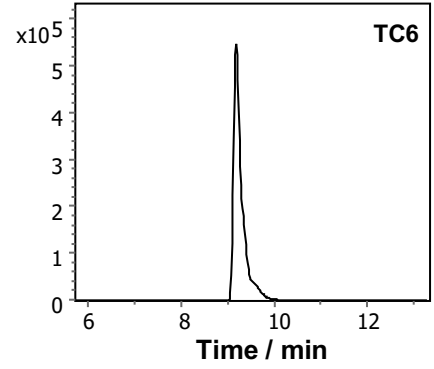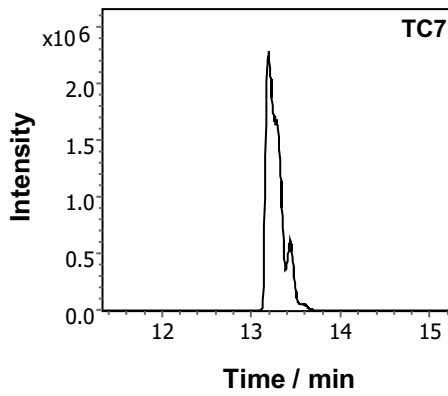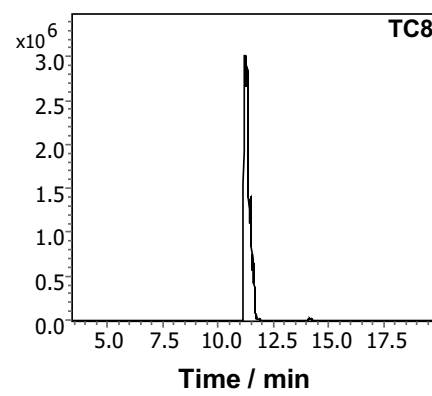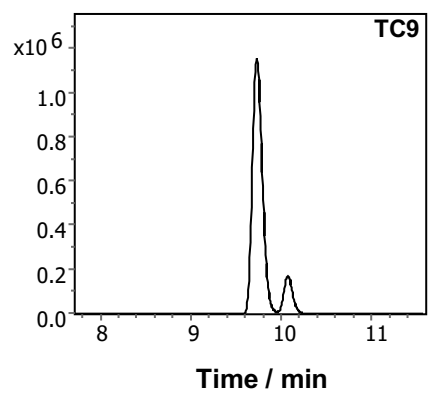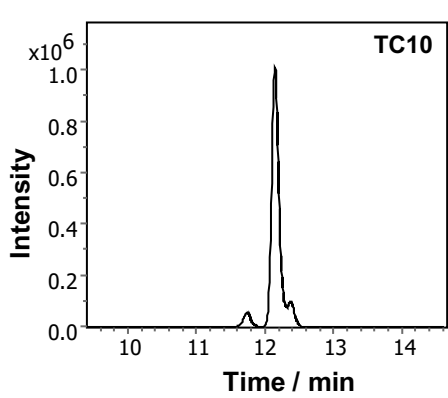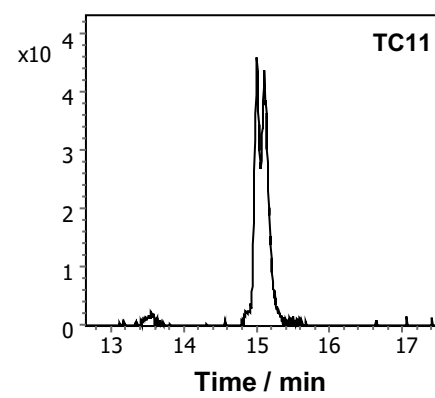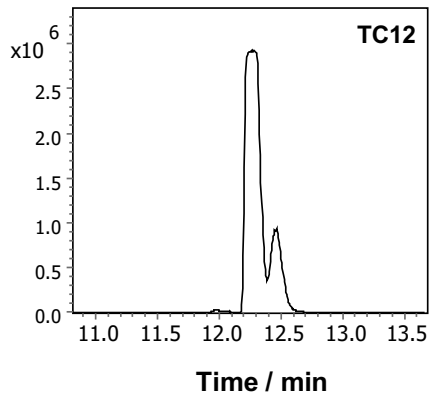

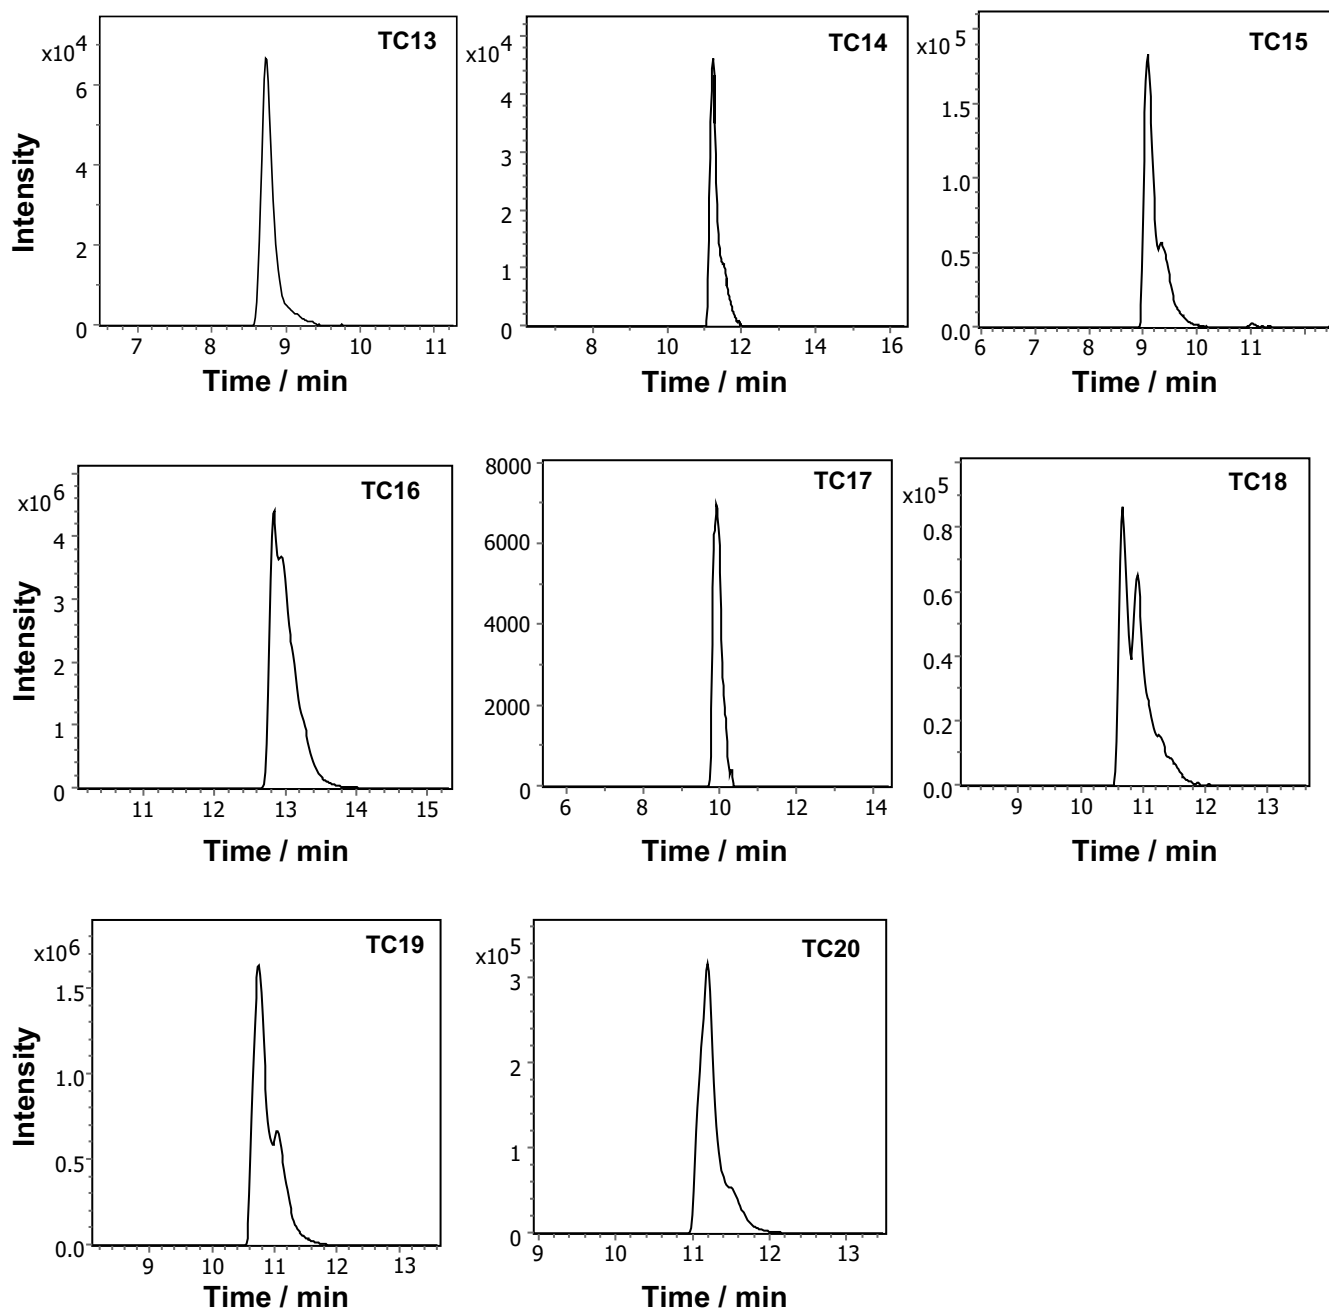

**Figure S2.** Extracted ion chromatograms of the thiol conjugates TC1-TC20.

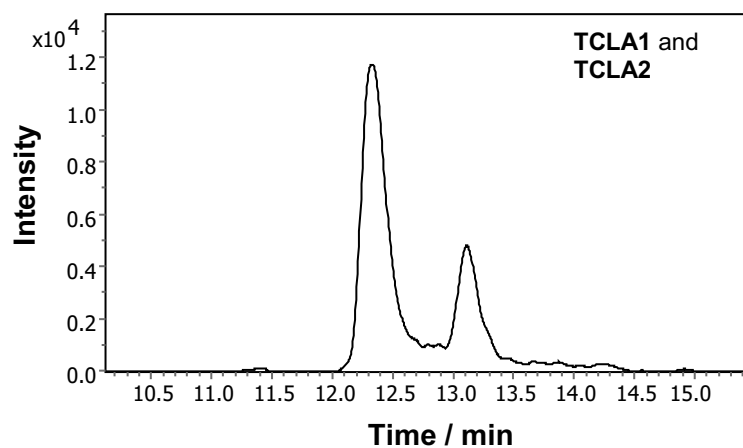

**Figure S3.** Extracted ion chromatograms of the lipoic acid conjugates **TCLA1** and **TCLA2**.

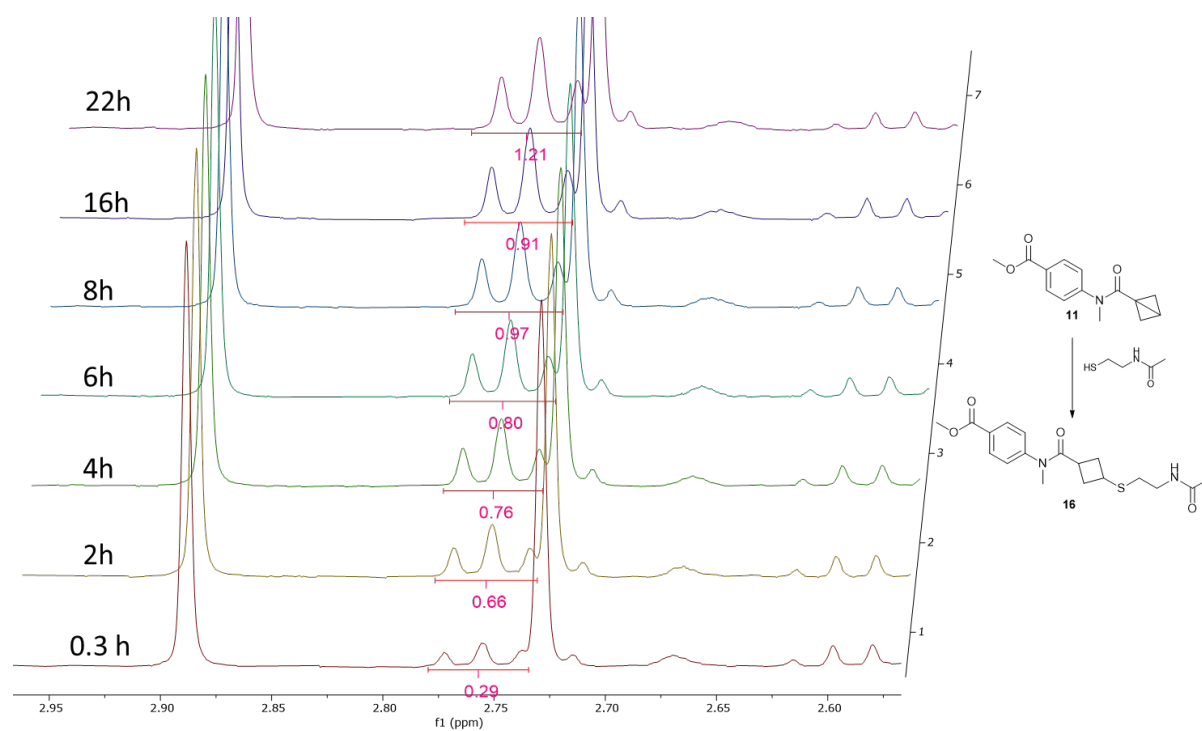

**Figure S4.** Time-based NMR monitoring of the conversion rate of intermediate **11** with *N*-acetylcysteamine.

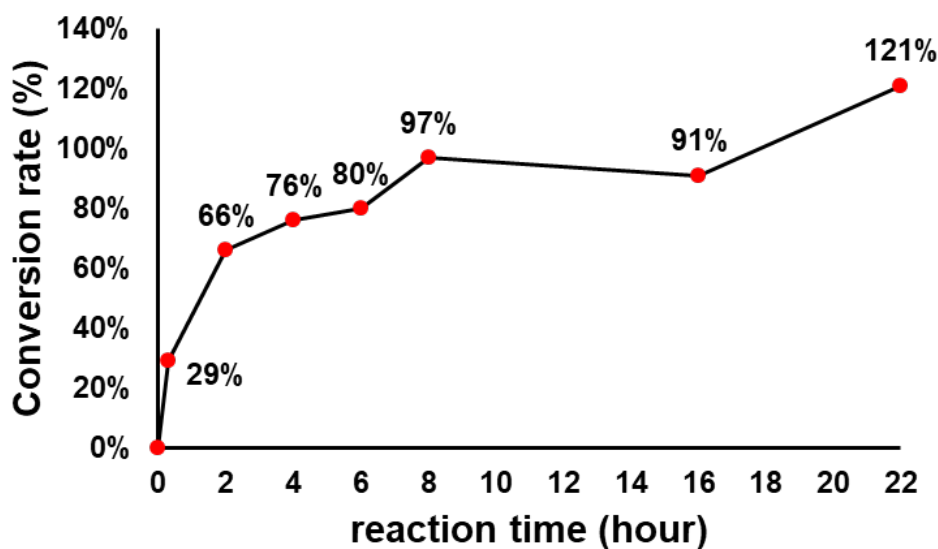

**Figure S5.** Conversion rate of thiol capture based on integration of NMR experiment in Figure S4.

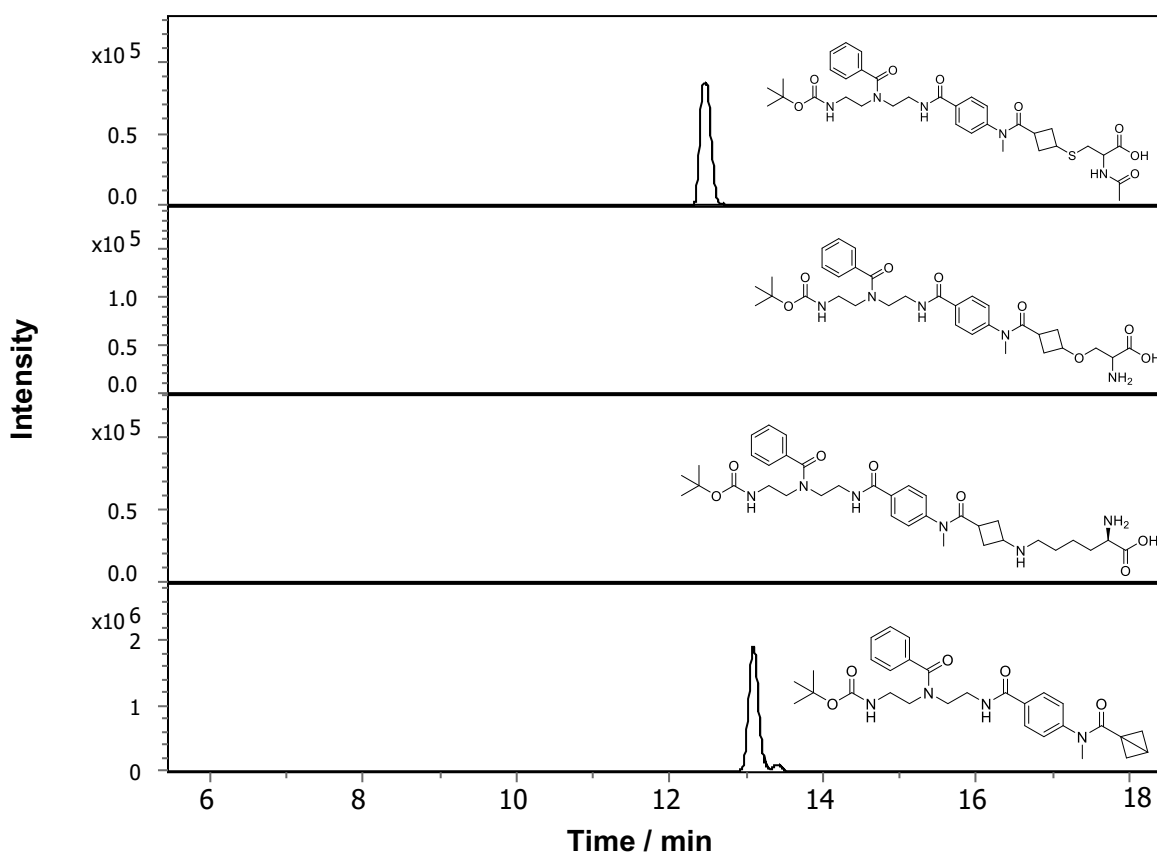

**Figure S6.** Extracted ion chromatograms of the conjugates detected in the chemoselectivity test demonstrating selectivity for thiols.



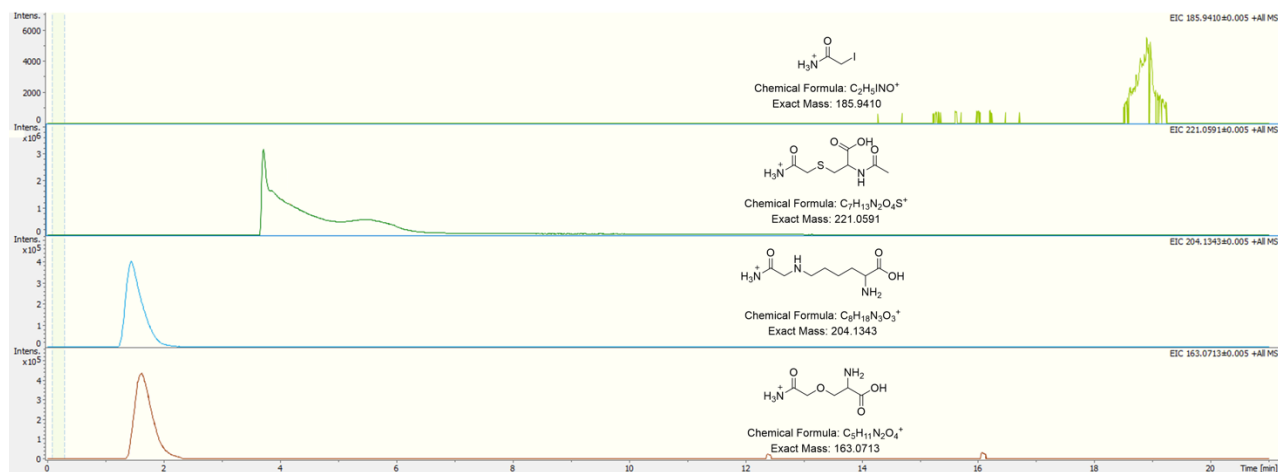

**Figure S7.** Extracted ion chromatograms of the conjugates detected in the chemoselectivity test using iodoacetamide.

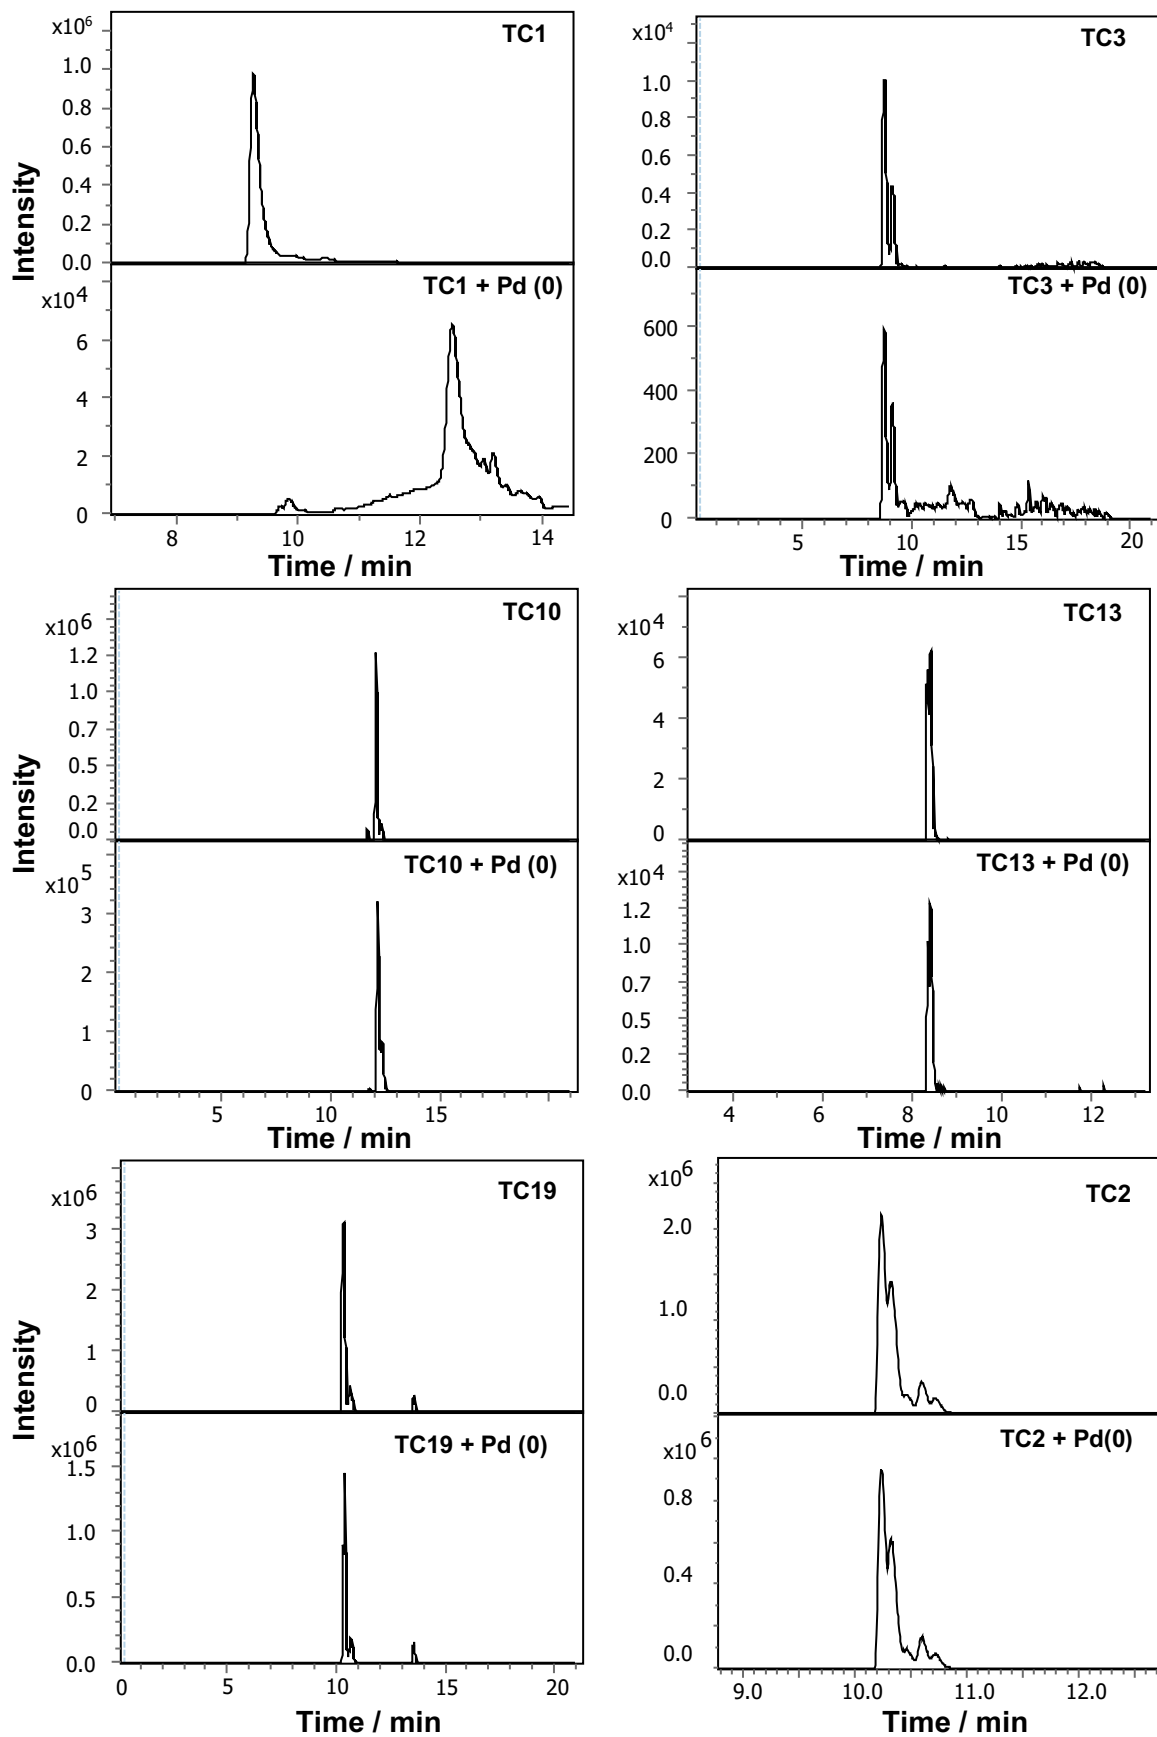

**Figure S8.** Extracted ion chromatograms of thiol conjugates before and after the stability test.

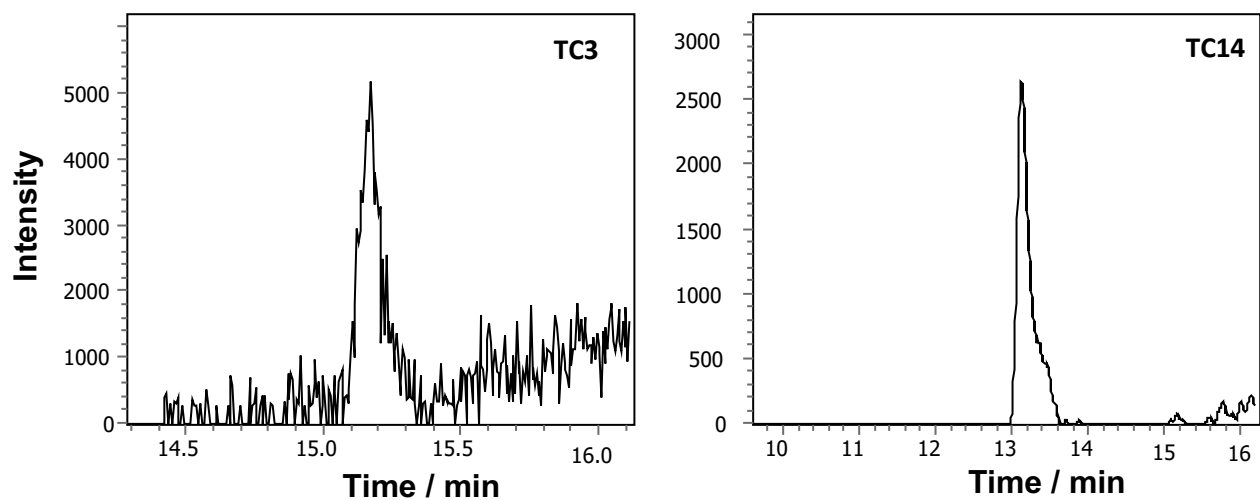

**Figure S9.** Extracted ion chromatograms of the captured cysteamine conjugate (TC3) and pantetheine (TC14),

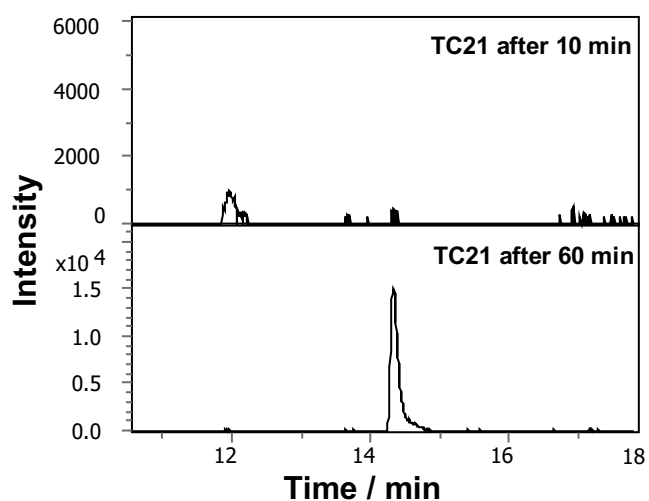

**Figure S10.** Extracted ion chromatograms of the synthetic cysteine persulfide conjugate TC21 captured using probe A.

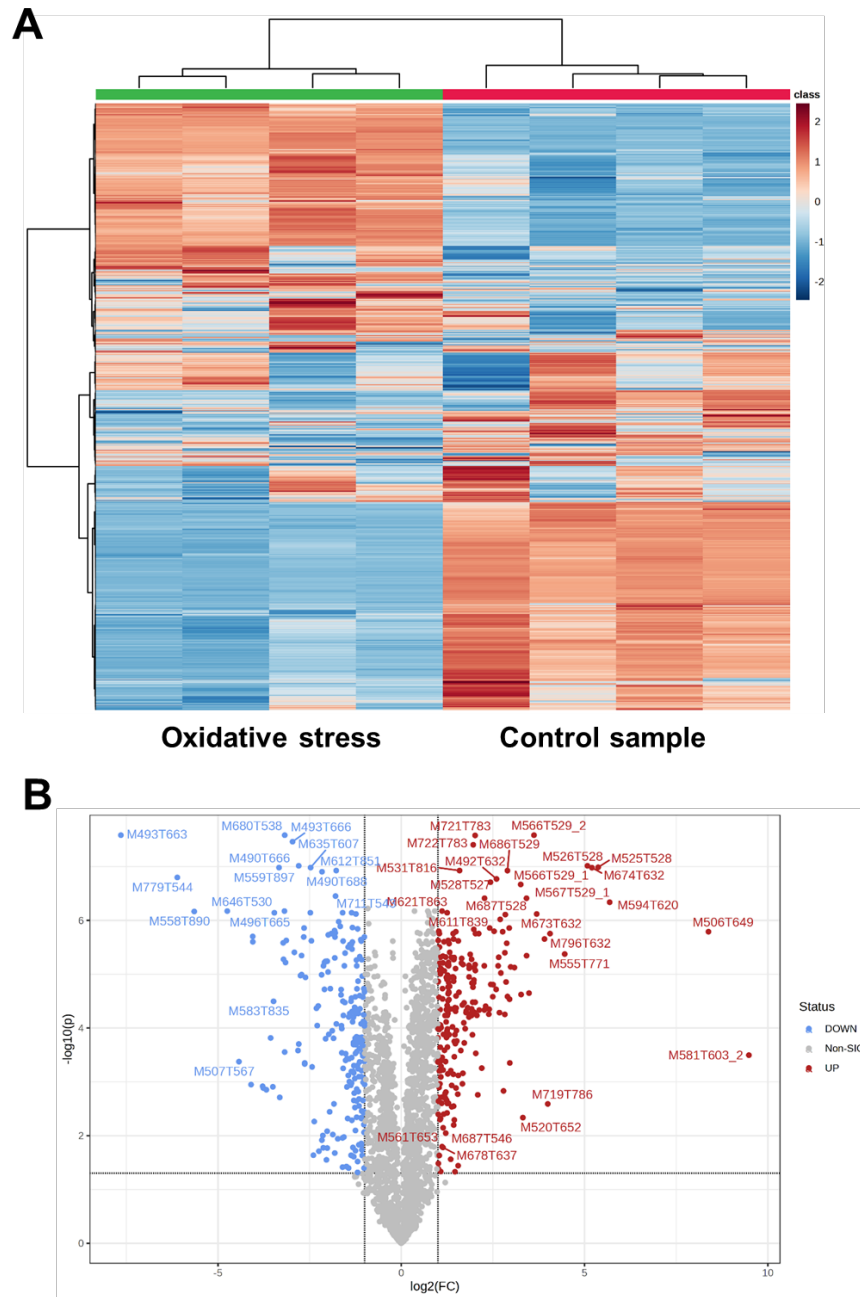

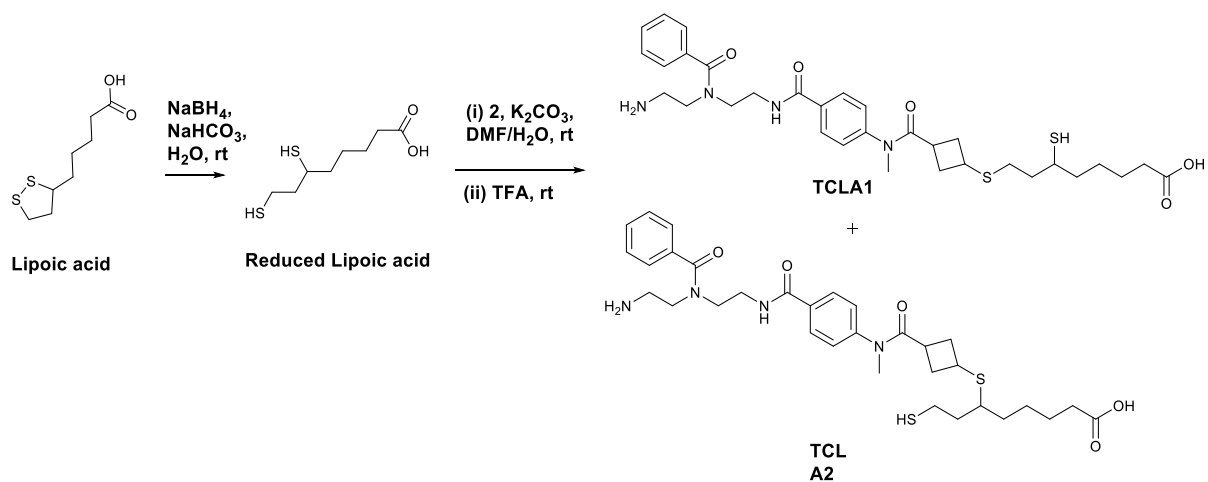

**Scheme S1.** Synthesis of standard lipoic acid probe conjugates **TCLA1** and **TCLA2** for the LC-MS based analysis.

## 2. Supporting Tables

**Table S1.** Features of thiol-containing metabolites in the human plasma.

The tentative chemical structure names are based on HMDB annotation (confidence level 3) and the correct structure without higher level of confidence can possibly be a regioisomer. Color indicators are related to the possible origin of metabolite according to HMDB database:

|                                                                                   |                                                        |
|-----------------------------------------------------------------------------------|--------------------------------------------------------|
|  | This compound is not a naturally occurring metabolite. |
|  | Diet related.                                          |
|  | Naturally occurring metabolite.                        |

| Feature ID | Monoisotopic mass | Conjugate mass | retention time (min) | Metabolite name                             | HMDB MF    |
|------------|-------------------|----------------|----------------------|---------------------------------------------|------------|
| M485T711   | 63.9930           | 485.2165       | 11.84                |                                             | CH4OS      |
| M493T676   | 71.9965           | 493.2200       | 11.25                | Thioacrolein                                | C3H4S      |
| M497T724   | 76.0346           | 497.2552       | 12.07                | 1-Propanethiol                              | C3H8S      |
| M498T653   | 77.0299           | 498.2424       | 10.87                | Cysteamine                                  | C2H7NS     |
| M507T731   | 86.0121           | 507.2356       | 12.18                | Divinyl sulfide/ 2,3-Dihydrothiophene       | C4H6S      |
| M513T578   | 92.0478           | 513.2713       | 9.63                 |                                             | C2H8N2S    |
| M529T731   | 107.9942          | 529.2177       | 12.18                | Vinylsulfonic Acid                          | C2H4O3S    |
| M537T635   | 116.0479          | 537.2714       | 10.58                |                                             | C4H8N2S    |
| M543T733   | 122.0372          | 543.2607       | 12.21                | Diethyl sulfone/ Thiodiglycol               | C4H10O2S   |
| M556T708   | 135.0354          | 556.2669       | 11.78                | Homocysteine                                | C4H9NO2S   |
| M572T692   | 151.0387          | 572.2622       | 11.53                | Thioacetanilide                             | C8H9NS     |
| M572T716   | 151.0638          | 572.2873       | 11.93                |                                             | C5H13NO2S  |
| M573T663   | 152.0156          | 573.2463       | 11.03                | Mercaptopurine                              | C5H4N4S    |
| M575T670_1 | 154.0378          | 575.2613       | 11.16                | 1-(5-Methyl-2-thienyl)-1-propanone          | C8H10OS    |
| M575T651   | 154.0380          | 575.2615       | 10.85                | 3-Acetyl-2,5-dimethylthiophene              | C8H10OS    |
| M577T625   | 156.0153          | 577.2388       | 10.42                | Methyl phenyl disulfide                     | C7H8S2     |
| M577T642_2 | 156.0538          | 577.2773       | 10.69                | 2-[(Isopropylthio)methyl]furan              | C8H12OS    |
| M587T767   | 166.0385          | 587.2620       | 12.78                | 2-Methyl-6-thiopurine                       | C6H6N4S    |
| M587T767   | 166.0385          | 587.2620       | 12.78                | 6-Methylmercaptopurine                      | C6H6N4S    |
| M589T620_2 | 168.0176          | 589.2411       | 10.32                | (Phenylthio)acetic acid                     | C8H8O2S    |
| M603T662   | 182.0698          | 603.2933       | 11.03                |                                             | C5H14N2O3S |
| M605T721   | 184.0489          | 605.2724       | 12.01                | (+/-)-3-[(2-methyl-3-furyl)thio]-2-butanone | C9H12O2S   |
| M607T602   | 186.0279          | 607.2514       | 10.02                |                                             | C8H10O3S   |
| M609T767   | 188.0206          | 609.2441       | 12.78                |                                             | C7H8O4S    |
| M609T569   | 188.0439          | 609.2674       | 9.47                 | 2-(Sec-butylsulfanyl)-1h-imidazole          | C7H12N2S2  |
| M609T600   | 188.0436          | 609.2671       | 9.99                 | 2-(Sec-butylsulfanyl)-1h-imidazole          | C7H12N2S2  |

|            |          |          |       |                                                           |                               |
|------------|----------|----------|-------|-----------------------------------------------------------|-------------------------------|
| M619T758   | 198.0651 | 619.2886 | 12.71 | 4-[(2-Furanylmethyl)thio]-2-pentanone                     | C10H14O2S                     |
| M625T767   | 203.9946 | 625.2181 | 12.78 |                                                           | C4H4N4O4S                     |
| M627T721   | 206.0310 | 627.2545 | 12.02 |                                                           | C5H10N4O4S2                   |
| M641T758   | 220.0469 | 641.2704 | 12.70 |                                                           | C7H12N2O4S                    |
| M647T643   | 226.0960 | 647.3195 | 10.72 | 3-[(2-Methyl-3-furanyl)thio]-4-heptanone                  | C12H18O2S                     |
| M649T646   | 228.0752 | 649.2987 | 10.69 | Antigastrin/ Phosphonol                                   | C13H12N2S/<br>C6H17N2O3PS     |
| M652T753   | 231.0902 | 652.3137 | 12.28 | L-Proline, 1-(2-methyl-3-(methylthio)-1-oxopropyl)-, (S)- | C10H17NO3S                    |
| M653T727   | 232.0867 | 653.3102 | 12.12 |                                                           | C10H16O4S                     |
| M669T708_2 | 248.0805 | 669.3040 | 11.72 | (5'-methylthio)pentylmalate                               | C10H16O5S                     |
| M688T647   | 267.1590 | 688.3825 | 10.77 |                                                           | C10H25N3O3S                   |
| M699T625   | 278.1300 | 699.3103 | 10.41 | Pantetheine                                               | C11H22N2O4S                   |
| M717T576   | 296.0975 | 717.3210 | 9.60  | Bentazepam                                                | C17H16N2OS                    |
| M724T771   | 303.1591 | 724.3826 | 12.85 | 1-Oxononan-4-yl (2R)-2-acetamido-3-sulfanylpropanoate     | C14H25NO4S                    |
| M727T668   | 306.0607 | 727.2842 | 11.13 | Monoacetyldapsone hydroxylamine                           | C14H14N2O4S                   |
| M729T690   | 308.0760 | 729.2995 | 10.85 | phenylacetohydroximoyl-cysteinylglycine                   | C13H14N3O4S                   |
| M731T664   | 310.0919 | 731.3154 | 11.05 |                                                           | C13H18N4OS2                   |
| M731T614   | 310.1126 | 731.3361 | 10.23 | Dibutyl sulfosuccinate                                    | C12H22O7S                     |
| M731T626   | 310.1114 | 731.3349 | 10.43 | Dibutyl sulfosuccinate                                    | C12H22O7S                     |
| M747T641   | 326.0870 | 747.3105 | 10.67 |                                                           | C12H22O6S2                    |
| M751T652   | 330.0583 | 751.2818 | 10.85 |                                                           | C6H14N6O8S                    |
| M757T715   | 336.1078 | 757.3313 | 11.91 | Firocoxib                                                 | C17H20O5S                     |
| M757T677   | 336.1079 | 757.3314 | 11.27 | Firocoxib                                                 | C17H20O5S                     |
| M773T677   | 352.1030 | 773.3265 | 11.28 | Hexythiazox/ Penicilloic acid                             | C17H21CIN2O2S/<br>C16H20N2O5S |
| M785T785   | 364.1397 | 785.3632 | 13.09 | Pyridaben/ Desacetyl-alacepril                            | C19H25CIN2OS/<br>C18H24N2O4S  |
| M787T708   | 366.1182 | 787.3417 | 11.78 | Ilaprazole                                                | C19H18N4O2S                   |
| M789T642   | 368.0979 | 789.3214 | 10.69 | Phenoxomethylpenicilloyl                                  | C16H20N2O6S                   |
| M798T718   | 377.0869 | 798.3104 | 11.96 | S-Pyruvylglutathione                                      | C13H19N3O8S                   |
| M817T653   | 396.1289 | 817.3524 | 10.88 |                                                           | C17H24N4O3S2                  |
| M818T624   | 396.1287 | 817.3522 | 10.39 |                                                           | C17H24N4O3S2                  |
| M841T625   | 420.2168 | 841.4403 | 10.40 |                                                           | C24H36O2S2                    |
| M863T625   | 442.1989 | 863.4224 | 10.40 |                                                           | C17H34N2O9S                   |
| M879T633   | 458.0831 | 879.3066 | 10.54 |                                                           | C15H18N6O9S                   |

**Table S2.** Features of thiol-containing metabolites in the pooled human feces.

The tentative chemical structure names are based on HMDB annotation (confidence level 3) and the correct structure without higher level of confidence can possibly be a regioisomer. Color indicators are related to the possible origin of metabolite according to HMDB database:

|                                                                                   |                                                        |
|-----------------------------------------------------------------------------------|--------------------------------------------------------|
|  | This compound is not a naturally occurring metabolite. |
|  | Diet related.                                          |
|  | Naturally occurring metabolite.                        |

| Feature ID | Monoisotopic mass | Conjugate mass | retention time (min) | Metabolite name                             | HMDB MF    |
|------------|-------------------|----------------|----------------------|---------------------------------------------|------------|
| M483T726   | 61.9066           | 483.1301       | 12.11                |                                             |            |
| M485T480_2 | 63.9650           | 485.1885       | 7.98                 |                                             |            |
| M485T669   | 63.9932           | 485.2167       | 11.76                |                                             | CH4OS      |
| M493T687   | 71.9968           | 493.2203       | 11.44                | Thioacrolein                                | C3H4S      |
| M513T586   | 92.0482           | 513.2717       | 9.77                 |                                             | C2H8N2S    |
| M529T726   | 107.9945          | 529.2180       | 12.11                |                                             | C2H4O3S    |
| M542T793   | 121.0197          | 542.2746       | 13.21                | Cysteine                                    | C3H7NO2S   |
| M543T755   | 122.0378          | 543.2613       | 12.42                |                                             | C4H10O2S   |
| M543T766   | 122.0377          | 543.2612       | 12.75                |                                             | C4H10O2S   |
| M543T755   | 122.0378          | 543.2613       | 12.59                |                                             | C4H10O2S   |
| M551T691   | 130.0640          | 551.2875       | 11.52                | 6-Methyl-5,6-dihydro-4H-1,3-thiazin-2-amine | C5H10N2S   |
| M553T558   | 131.9817          | 553.2052       | 9.3                  |                                             | C3H4N2S2   |
| M556T720   | 135.0354          | 556.2674       | 11.99                | Homocysteine                                | C4H9NO2S   |
| M572T703   | 151.0392          | 572.2627       | 11.73                | Thioacetanilide                             | C8H9NS     |
| M575T675   | 154.0389          | 575.2624       | 11                   | 1-(5-Methyl-2-thienyl)-1-propanone          | C8H10OS    |
| M575T622   | 154.0387          | 575.2622       | 10.37                | 3-Acetyl-2,5-dimethylthiophene              | C8H10OS    |
| M575T634   | 154.0388          | 575.2623       | 10.56                | 1-(2-Thienyl)-1-butanone                    | C8H10OS    |
| M575T692   | 154.0387          | 575.2622       | 11.25                |                                             | C4H10O4S   |
| M577T651   | 156.0542          | 577.2777       | 10.83                | 2-[(Isopropylthio)methyl]furan              | C8H12OS    |
| M587T766   | 166.0386          | 587.2621       | 12.74                | 2-Methyl-6-thiopurine                       | C6H6N4S    |
| M593T612   | 172.0491          | 593.2726       | 10.2                 |                                             | C4H8N6S    |
| M593T628   | 172.0492          | 593.2727       | 10.47                |                                             | C4H8N6S    |
| M593T668   | 172.0495          | 593.2730       | 11.14                |                                             | C4H8N6S    |
| M603T671   | 182.0703          | 603.2938       | 11.19                |                                             | CH10N8OS   |
| M605T717   | 184.0496          | 605.2731       | 11.96                | (+/-)-3-[(2-methyl-3-furyl)thio]-2-butanone | C9H12O2S   |
| M609T766   | 188.0207          | 609.2442       | 12.76                |                                             | C7H8O4S    |
| M609T611   | 188.0442          | 609.2677       | 10.15                | 2-(Sec-butylsulfanyl)-1H-imidazole          | C7H12N2S2  |
| M615T549   | 193.9432          | 615.1667       | 9.14                 |                                             | C3H2N2O4S2 |
| M621T550   | 199.9926          | 621.2161       | 9.17                 |                                             | C3H8N2O4S2 |



|          |          |          |       |                                                               |               |
|----------|----------|----------|-------|---------------------------------------------------------------|---------------|
| M631T763 | 209.9096 | 631.1331 | 12.72 |                                                               | H2O9S2        |
| M641T756 | 220.0470 | 641.2705 | 12.68 |                                                               | C7H12N2O4S    |
| M645T791 | 224.0813 | 645.3048 | 13.18 | Propyl 1-(propylthio)propyl disulfide                         | C9H20S3       |
| M647T651 | 226.0963 | 647.3198 | 10.85 | 3-[(2-Methyl-3-furanyl)thio]-4-heptanone                      | C12H18O2S     |
| M651T669 | 230.1072 | 651.3307 | 11.16 | Dicyclohexyl disulfide                                        | C12H22S2      |
| M652T758 | 231.0908 | 652.3143 | 12.63 | 1-(2-methyl-3-(methylthio)-1-oxopropyl)-                      | C10H17NO3S    |
| M655T727 | 233.9347 | 655.1582 | 12.11 |                                                               | C6H2O6S2      |
| M661T397 | 239.9467 | 661.1702 | 6.62  |                                                               | C7N2O6S       |
| M667T791 | 246.0631 | 667.2866 | 13.18 | S-Nitrosocaptopril/ 9-Deaza-9-(3-thienylmethyl)guanine        | C9H14N2O4S    |
| M699T634 | 278.1300 | 699.3109 | 10.54 | Pantetheine                                                   | C11H22N2O4S   |
| M709T980 | 288.1203 | 709.3438 | 16.33 | Soterenol                                                     | C12H20N2O4S   |
| M717T585 | 296.0986 | 717.3221 | 9.75  | Bentazepam                                                    | C17H16N2OS    |
| M729T647 | 308.0770 | 729.3005 | 10.73 | Dansylglycine/<br>phenylacetohydroximoyl-<br>cysteinylglycine | C14H16N2O4S   |
| M774T688 | 352.1036 | 773.3271 | 11.47 | Hexythiazox                                                   | C17H21ClN2O2S |
| M798T758 | 377.0878 | 798.3113 | 12.25 | S-Pyruvylglutathione                                          | C13H19N3O8S   |

**Table S3.** Features only detected in the control samples compared to the oxidative stress sample.

| Ctrl     | Conjugated mass | RT    |
|----------|-----------------|-------|
| M493T663 | 493.0626        | 11.06 |
| M779T544 | 779.1509        | 9.07  |
| M507T567 | 507.2501        | 9.44  |
| M742T662 | 742.3156        | 11.03 |
| M590T707 | 590.0541        | 11.79 |
| M595T707 | 595.0536        | 11.79 |
| M611T557 | 611.2542        | 9.28  |
| M583T835 | 583.0559        | 13.91 |

**Table S4.** Features only detected in the oxidative stress sample.

| OS         | Conjugated mass | RT    |
|------------|-----------------|-------|
| M506T649   | 506.1175        | 10.82 |
| M520T652   | 520.2656        | 10.87 |
| M526T528   | 526.1745        | 8.80  |
| M548T527_1 | 548.1085        | 8.79  |
| M555T771   | 555.3034        | 12.85 |
| M566T529_2 | 566.1390        | 8.82  |
| M581T603_2 | 581.2938        | 10.05 |
| M594T620   | 594.3142        | 10.33 |
| M673T632   | 673.3456        | 10.54 |
| M719T786   | 719.1918        | 13.10 |
| M738T528   | 738.1378        | 8.81  |
| M795T632   | 795.4018        | 10.53 |

M894T651            894.3784            10.85

**Table S5.** Semi-quantitative analysis of GSH in the comparison between control samples and oxidative stress samples through comparison of an internal standard.

| <b>AUC</b>   | <b>Ctrl-1</b> | <b>Ctrl-2</b> | <b>Ctrl-3</b> | <b>Ctrl-4</b> |             |
|--------------|---------------|---------------|---------------|---------------|-------------|
| <b>GSH</b>   | 35654         | 41399         | 45417         | 33873         |             |
| <b>IS</b>    | 651750        | 516590        | 463422        | 860325        | <b>Mean</b> |
| <b>Ratio</b> | 0.054705      | 0.080139      | 0.098004      | 0.039372      | 0.068055    |

  

| <b>AUC</b>   | <b>OS-1</b> | <b>OS-2</b> | <b>OS-3</b> | <b>OS-4</b> |             |
|--------------|-------------|-------------|-------------|-------------|-------------|
| <b>GSH</b>   | 20058       | 17490       | 19998       | 23349       |             |
| <b>IS</b>    | 653478      | 610691      | 530855      | 870360      | <b>Mean</b> |
| <b>Ratio</b> | 0.030694    | 0.02864     | 0.037671    | 0.026827    | 0.030958    |

**Table S6. Detected Top100 features from bacteria lysates with intensities.**

| m/z      | p.value  | FDR      | Salmonella-1 | Salmonella-2 | Salmonella-3 | Salmonella-4 | Shigella_1 | Shigella_2 | Shigella_3 | Shigella_4 | E.coli_1    | E.coli_2    | E.coli_3    | E.coli_4    |
|----------|----------|----------|--------------|--------------|--------------|--------------|------------|------------|------------|------------|-------------|-------------|-------------|-------------|
| 574.2154 | 7.28E-20 | 1.33E-16 | 310341.75    | 310271.57    | 311239.96    | 310336.52    | 52104.20   | 52292.37   | 51736.64   | 51682.96   | 349699.06   | 352972.32   | 353739.17   | 350634.38   |
| 816.4107 | 1.88E-18 | 1.72E-15 | 301634.50    | 306935.80    | 307700.98    | 308910.41    | 6351.54    | 5222.96    | 6168.30    | 5663.91    | 462838.43   | 458495.94   | 457812.63   | 457785.94   |
| 815.4073 | 3.28E-18 | 2.00E-15 | 639293.30    | 642874.57    | 646652.70    | 643348.38    | 11979.32   | 11763.80   | 12332.68   | 12797.66   | 973021.93   | 987756.34   | 979723.26   | 992620.36   |
| 558.2414 | 2.29E-17 | 9.25E-15 | 5637974.39   | 5677237.15   | 5632748.13   | 5680283.04   | 805020.29  | 793383.77  | 790970.45  | 802026.68  | 6433519.31  | 6524083.51  | 6473879.83  | 6587086.45  |
| 553.2951 | 2.53E-17 | 9.25E-15 | 393414.30    | 400784.61    | 399367.30    | 401477.35    | 7458.62    | 10770.81   | 6105.01    | 5304.61    | 591208.09   | 578995.33   | 582664.08   | 587147.67   |
| 515.3390 | 4.77E-17 | 1.45E-14 | 7127510.31   | 7138006.14   | 7118841.96   | 7155885.38   | 30704.70   | 29254.00   | 29947.10   | 30038.40   | 13543565.21 | 13549737.28 | 13474675.99 | 13855009.68 |
| 536.2595 | 6.61E-17 | 1.73E-14 | 3633401.38   | 3706466.96   | 3684780.90   | 3759647.80   | 326401.73  | 310705.94  | 317452.00  | 311084.35  | 5235936.09  | 5144359.83  | 5189461.22  | 5202272.62  |
| 516.3420 | 1.10E-16 | 2.51E-14 | 1838142.16   | 1829778.31   | 1845902.34   | 1794622.47   | 7709.47    | 8458.45    | 8290.25    | 9157.34    | 3684782.47  | 3661756.20  | 3679150.74  | 3587892.27  |
| 537.3207 | 1.51E-16 | 3.06E-14 | 6651147.55   | 6662970.56   | 6637853.78   | 6620528.78   | 66354.40   | 66285.78   | 66059.89   | 69081.86   | 9736876.25  | 9886080.44  | 9757827.93  | 10043055.62 |
| 554.2981 | 1.76E-16 | 3.22E-14 | 108557.06    | 110579.31    | 110109.34    | 112145.36    | 7210.50    | 8524.54    | 8873.51    | 8127.09    | 158220.13   | 158581.87   | 155786.28   | 159191.56   |
| 539.3271 | 3.78E-16 | 6.29E-14 | 248137.72    | 246376.43    | 244036.92    | 246011.00    | 2666.07    | 3545.08    | 3739.65    | 2881.89    | 364460.36   | 371372.92   | 371415.65   | 360041.76   |
| 553.7589 | 1.38E-15 | 2.10E-13 | 24197.52     | 25015.24     | 25357.14     | 24945.96     | 0.00       | 117.33     | 98.52      | 112.75     | 47835.65    | 46598.59    | 47722.20    | 46524.50    |
| 557.6790 | 1.81E-15 | 2.54E-13 | 9097.52      | 8749.85      | 9282.21      | 9536.21      | 115507.85  | 111414.81  | 115248.04  | 114494.91  | 25100.31    | 27190.00    | 25546.36    | 25598.91    |
| 517.3449 | 2.30E-15 | 3.01E-13 | 259552.32    | 261975.70    | 263870.65    | 257148.50    | 7955.18    | 8631.71    | 9095.82    | 1077.90    | 506925.70   | 506409.88   | 499936.78   | 489183.43   |
| 537.2627 | 2.88E-15 | 3.51E-13 | 1251052.46   | 1261258.39   | 1268383.70   | 1247369.10   | 109304.06  | 112149.83  | 110799.08  | 112033.29  | 1864556.30  | 1840154.49  | 1852783.66  | 1788792.96  |
| 604.2980 | 4.40E-15 | 5.03E-13 | 26868.74     | 25522.31     | 25405.12     | 25042.21     | 221959.64  | 224860.14  | 224777.98  | 228674.59  | 138075.82   | 131155.44   | 136380.98   | 136201.33   |
| 647.3415 | 5.89E-15 | 6.15E-13 | 25106.24     | 24163.67     | 22730.23     | 23236.91     | 22898.93   | 22368.45   | 21665.38   | 23522.77   | 154941.65   | 152416.54   | 151274.49   | 157948.23   |
| 684.3936 | 6.05E-15 | 6.15E-13 | 1114.64      | 1283.95      | 1318.35      | 1824.55      | 53201.14   | 53989.40   | 53441.62   | 51873.41   | 10612.86    | 11322.55    | 11848.65    | 12226.97    |
| 560.2480 | 6.39E-15 | 6.15E-13 | 303675.37    | 305875.78    | 307694.92    | 304049.08    | 51966.60   | 50861.13   | 51485.34   | 52926.35   | 369633.44   | 368837.89   | 367604.60   | 354994.28   |
| 696.2081 | 7.60E-15 | 6.95E-13 | 14410.11     | 16038.99     | 14923.46     | 13905.95     | 3464.81    | 3225.52    | 3701.25    | 3729.42    | 109259.82   | 110029.52   | 114723.16   | 112059.14   |
| 538.2661 | 8.76E-15 | 7.63E-13 | 227457.78    | 227843.24    | 227124.13    | 230657.53    | 19789.61   | 20897.48   | 19805.66   | 20347.72   | 339932.04   | 331153.82   | 341561.39   | 327040.69   |
| 508.2513 | 1.92E-14 | 1.59E-12 | 633.15       | 1259.09      | 874.57       | 1071.40      | 53834.38   | 56651.99   | 54265.37   | 55364.31   | 7582.59     | 7550.22     | 7426.05     | 8794.68     |
| 554.7585 | 2.50E-14 | 1.99E-12 | 12156.15     | 12386.33     | 12490.25     | 12599.68     | 0.00       | 96.51      | 0.00       | 0.00       | 24607.05    | 23495.47    | 24580.03    | 24753.39    |
| 491.2173 | 2.74E-14 | 2.09E-12 | 7229.00      | 6126.09      | 6594.47      | 7013.56      | 87789.93   | 89509.68   | 92857.76   | 90218.99   | 24315.33    | 23229.04    | 24360.55    | 24446.28    |
| 479.2291 | 3.51E-14 | 2.57E-12 | 46821.35     | 47515.06     | 49690.75     | 46229.57     | 7745.08    | 7884.26    | 7833.13    | 7643.32    | 68661.03    | 68558.93    | 69128.99    | 67796.17    |
| 543.2580 | 3.67E-14 | 2.59E-12 | 81304.25     | 78335.94     | 77290.52     | 76725.98     | 10868.93   | 10175.81   | 10053.29   | 10487.29   | 108802.90   | 110195.00   | 110193.44   | 106692.78   |
| 697.2068 | 3.82E-14 | 2.59E-12 | 17647.08     | 19002.54     | 18707.32     | 19100.75     | 2412.35    | 2404.72    | 1784.88    | 2481.83    | 135219.21   | 142572.80   | 142916.61   | 143625.13   |
| 506.3052 | 5.07E-14 | 3.31E-12 | 0.00         | 0.00         | 223.02       | 0.00         | 15071.54   | 14391.57   | 15005.25   | 14332.98   | 1837.38     | 1434.64     | 1676.02     | 1728.57     |
| 569.8405 | 6.42E-14 | 4.05E-12 | 5609.64      | 6005.79      | 4772.15      | 5913.47      | 48118.16   | 48218.82   | 49430.27   | 50340.42   | 14386.55    | 14078.32    | 14169.19    | 13304.94    |
| 543.8002 | 7.20E-14 | 4.39E-12 | 9996.02      | 9086.77      | 9275.85      | 9093.82      | 0.00       | 98.68      | 0.00       | 108.24     | 21828.17    | 21409.49    | 22452.69    | 22144.31    |
| 699.2065 | 8.24E-14 | 4.86E-12 | 15785.16     | 15188.46     | 15654.37     | 15976.32     | 1333.04    | 1944.90    | 1351.03    | 1569.58    | 112542.62   | 120094.30   | 120009.24   | 119098.75   |
| 559.2447 | 8.56E-14 | 4.90E-12 | 1752508.16   | 1769793.30   | 1771210.43   | 1808163.42   | 284408.81  | 281170.09  | 288278.25  | 289478.44  | 2160256.82  | 2112991.55  | 2126311.73  | 2039760.07  |
| 518.3477 | 1.31E-13 | 7.24E-12 | 28249.08     | 27252.76     | 27408.58     | 27755.42     | 3372.73    | 4078.53    | 3766.19    | 3604.69    | 52662.88    | 52021.58    | 53999.76    | 50701.44    |
| 685.2521 | 1.64E-13 | 8.61E-12 | 2762.67      | 1442.69      | 2365.69      | 2364.54      | 27978.87   | 27024.23   | 27263.79   | 27820.40   | 5431.09     | 4590.37     | 4322.24     | 4622.05     |
| 555.2956 | 1.65E-13 | 8.61E-12 | 36309.06     | 36197.13     | 37209.24     | 37317.87     | 5128.89    | 4020.80    | 4718.98    | 5495.16    | 49638.87    | 51494.43    | 51819.81    | 52416.44    |
| 504.2453 | 1.87E-13 | 9.49E-12 | 0.00         | 103.25       | 0.00         | 0.00         | 27841.57   | 25780.06   | 27226.93   | 27382.23   | 2442.53     | 2175.58     | 2875.66     | 2637.95     |
| 642.3459 | 1.99E-13 | 9.68E-12 | 1899.86      | 1269.65      | 1242.25      | 1052.38      | 27009.71   | 27951.98   | 27537.02   | 26372.90   | 6623.94     | 7412.73     | 7036.17     | 6631.79     |
| 767.1938 | 2.01E-13 | 9.68E-12 | 920.94       | 884.33       | 1229.79      | 876.93       | 446.92     | 194.80     | 224.84     | 200.29     | 10400.25    | 10752.29    | 10804.42    | 10174.70    |

| m/z      | p.value  | FDR      | Salmonella-1 | Salmonella-2 | Salmonella-3 | Salmonella-4 | Shigella 1 | Shigella 2 | Shigella 3 | Shigella 4 | E.coli_1  | E.coli_2  | E.coli_3  | E.coli_4  |
|----------|----------|----------|--------------|--------------|--------------|--------------|------------|------------|------------|------------|-----------|-----------|-----------|-----------|
| 575.2185 | 2.11E-13 | 9.91E-12 | 103527.70    | 106861.19    | 105191.44    | 109441.15    | 23699.42   | 21609.57   | 25372.99   | 21978.50   | 119259.05 | 121889.29 | 121826.14 | 119693.96 |
| 700.2091 | 3.10E-13 | 1.42E-11 | 5977.48      | 5339.15      | 6095.26      | 6059.88      | 484.37     | 294.15     | 433.23     | 319.92     | 40587.45  | 42664.69  | 41457.78  | 43958.62  |
| 502.2141 | 4.79E-13 | 2.14E-11 | 30436.54     | 29914.52     | 30785.01     | 30575.56     | 7680.50    | 6376.03    | 6794.48    | 6679.40    | 38073.97  | 38125.13  | 37567.06  | 39690.02  |
| 560.2930 | 5.25E-13 | 2.19E-11 | 1387.58      | 1751.72      | 2204.75      | 2413.87      | 50664.81   | 51295.42   | 47945.50   | 48169.46   | 10710.02  | 10159.10  | 10400.28  | 10736.92  |
| 659.3405 | 5.35E-13 | 2.19E-11 | 2001.24      | 2316.98      | 2157.08      | 2682.56      | 38280.77   | 37433.58   | 40138.02   | 39755.23   | 11716.71  | 11330.28  | 11247.80  | 12025.22  |
| 441.2345 | 5.36E-13 | 2.19E-11 | 1444.88      | 1331.49      | 1120.39      | 1870.52      | 29149.81   | 31106.72   | 30452.77   | 29939.77   | 24077.89  | 22659.91  | 23172.10  | 23359.58  |
| 486.2923 | 5.40E-13 | 2.19E-11 | 0.00         | 0.00         | 93.66        | 0.00         | 18627.94   | 17046.14   | 17737.29   | 17774.99   | 1825.09   | 1408.72   | 1810.14   | 1351.15   |
| 759.4119 | 5.75E-13 | 2.29E-11 | 4251.56      | 2689.78      | 3670.88      | 4167.02      | 40814.86   | 42507.56   | 43085.52   | 42719.97   | 13991.31  | 13843.23  | 13335.17  | 15024.60  |
| 489.7844 | 6.16E-13 | 2.40E-11 | 0.00         | 0.00         | 194.03       | 16531.59     | 17192.33   | 17730.45   | 17259.75   | 2161.15    | 2153.88   | 1376.90   | 2419.73   | 2171.93   |
| 687.1278 | 6.64E-13 | 2.53E-11 | 7557.33      | 7658.88      | 7725.24      | 7794.17      | 1656.26    | 1538.71    | 1761.20    | 1914.15    | 756.93    | 1127.39   | 1151.36   | 1103.99   |
| 559.6797 | 6.86E-13 | 2.56E-11 | 3102.34      | 2843.17      | 3891.32      | 1941.03      | 49059.24   | 46757.54   | 49910.30   | 48616.63   | 11169.83  | 10984.51  | 12795.90  | 11949.11  |
| 521.2759 | 8.74E-13 | 3.20E-11 | 24479.38     | 23519.27     | 23868.49     | 22950.85     | 5148.60    | 5518.88    | 5086.87    | 5265.39    | 35436.27  | 33457.28  | 34059.69  | 33802.11  |
| 719.2808 | 9.09E-13 | 3.25E-11 | 11283.29     | 11900.05     | 12057.71     | 12137.71     | 1049.40    | 503.93     | 653.42     | 983.04     | 26856.38  | 25258.50  | 26546.94  | 25321.09  |
| 943.3336 | 9.23E-13 | 3.25E-11 | 211.48       | 225.40       | 291.17       | 419.95       | 4458.59    | 4330.18    | 4424.87    | 4275.18    | 658.49    | 475.00    | 719.53    | 522.34    |
| 598.6791 | 9.75E-13 | 3.37E-11 | 7144.43      | 6844.40      | 5892.29      | 7686.25      | 94412.86   | 90414.71   | 87120.77   | 88141.73   | 20099.62  | 20878.54  | 21112.82  | 21413.56  |
| 698.2093 | 1.00E-12 | 3.39E-11 | 5661.01      | 6566.83      | 6789.46      | 6742.16      | 103.30     | 620.26     | 307.07     | 417.72     | 45071.66  | 47516.24  | 47439.38  | 49613.34  |
| 634.3051 | 1.03E-12 | 3.41E-11 | 13452.26     | 13061.54     | 13099.87     | 12569.56     | 4151.64    | 3884.50    | 4307.52    | 3732.89    | 1258.47   | 1369.66   | 1232.69   | 1534.89   |
| 470.2975 | 1.16E-12 | 3.78E-11 | 678.78       | 534.36       | 521.40       | 789.98       | 23434.18   | 23271.70   | 22453.64   | 22624.37   | 2823.60   | 3967.83   | 2085.96   | 3385.43   |
| 843.2016 | 1.37E-12 | 4.41E-11 | 1747.15      | 2369.17      | 2593.25      | 3275.30      | 18920.42   | 18530.17   | 18953.82   | 18699.39   | 5862.39   | 5608.35   | 5816.22   | 5939.88   |
| 539.2696 | 1.40E-12 | 4.42E-11 | 28639.85     | 29598.54     | 29332.73     | 30196.10     | 1822.34    | 4775.54    | 2923.52    | 2501.22    | 41177.21  | 42746.34  | 42279.51  | 41840.16  |
| 628.3304 | 1.72E-12 | 5.32E-11 | 1616.16      | 1595.64      | 1887.02      | 1607.61      | 18493.98   | 18358.47   | 17846.83   | 18874.61   | 6452.92   | 7187.78   | 7345.82   | 7687.63   |
| 675.3143 | 2.34E-12 | 7.12E-11 | 7831.07      | 7895.98      | 7688.87      | 7867.64      | 1125.79    | 910.44     | 1001.45    | 799.66     | 1005.58   | 535.94    | 1216.66   | 839.67    |
| 697.2987 | 2.55E-12 | 7.65E-11 | 6488.87      | 6461.94      | 6129.75      | 5876.24      | 2124.19    | 1855.93    | 2967.04    | 1933.77    | 18392.14  | 19306.22  | 18493.65  | 18537.42  |
| 534.8141 | 2.77E-12 | 8.17E-11 | 1480.00      | 1540.20      | 1252.10      | 1452.80      | 0.00       | 110.23     | 95.14      | 0.00       | 4854.47   | 5203.31   | 5148.80   | 5246.22   |
| 632.2983 | 4.24E-12 | 1.23E-10 | 121566.14    | 126280.15    | 130354.55    | 120061.78    | 41109.46   | 37271.20   | 36478.84   | 37359.53   | 14514.34  | 15513.76  | 14200.45  | 13995.78  |
| 696.2846 | 4.60E-12 | 1.32E-10 | 23132.78     | 23865.56     | 25176.18     | 25235.78     | 3354.43    | 3510.21    | 3140.01    | 3117.28    | 25237.23  | 26241.05  | 26072.78  | 25862.16  |
| 682.1248 | 4.95E-12 | 1.39E-10 | 11703.48     | 11267.32     | 11705.64     | 11343.46     | 2685.98    | 3434.64    | 3347.06    | 3271.12    | 1175.96   | 1416.93   | 1605.59   | 1779.58   |
| 638.1850 | 5.11E-12 | 1.42E-10 | 18291.68     | 19779.58     | 19453.89     | 19820.97     | 4078.31    | 2844.46    | 3745.06    | 3026.42    | 22783.24  | 23269.03  | 23209.10  | 23212.03  |
| 479.2291 | 5.32E-12 | 1.45E-10 | 36483.80     | 35572.58     | 32915.74     | 34168.96     | 7586.77    | 8087.27    | 7291.56    | 7353.98    | 50655.67  | 49179.51  | 50187.25  | 48199.13  |
| 841.2024 | 5.98E-12 | 1.61E-10 | 3178.55      | 2491.91      | 2833.89      | 3231.12      | 24698.67   | 22600.28   | 23781.53   | 23109.06   | 6838.28   | 6778.54   | 7355.55   | 6731.92   |
| 753.2994 | 6.22E-12 | 1.65E-10 | 694.35       | 881.54       | 531.08       | 536.17       | 702.88     | 190.20     | 827.28     | 678.33     | 10919.20  | 11071.51  | 10090.86  | 10680.84  |
| #####    | 7.03E-12 | 1.84E-10 | 337.44       | 411.79       | 424.03       | 418.27       | 10284.96   | 10230.90   | 10475.89   | 10241.37   | 892.73    | 1759.29   | 1412.54   | 2048.07   |
| 633.3018 | 7.28E-12 | 1.88E-10 | 50711.59     | 55392.73     | 54893.63     | 53383.41     | 17984.90   | 17027.33   | 15827.80   | 16345.32   | 6382.45   | 7116.84   | 7057.91   | 6425.91   |
| 821.4402 | 7.75E-12 | 1.95E-10 | 150.13       | 675.31       | 385.61       | 103.26       | 12548.32   | 12776.48   | 12712.02   | 13756.78   | 1917.50   | 1378.86   | 1708.84   | 1376.49   |
| 583.3279 | 7.79E-12 | 1.95E-10 | 211.40       | 92.18        | 105.41       | 95.17        | 8180.79    | 7854.56    | 7580.56    | 7802.82    | 655.83    | 518.98    | 1217.39   | 579.59    |
| 501.2110 | 7.95E-12 | 1.97E-10 | 98762.16     | 98433.55     | 100806.19    | 95658.29     | 17302.41   | 17092.15   | 16711.85   | 20187.83   | 134188.01 | 131521.06 | 135371.99 | 124405.22 |
| #####    | 9.97E-12 | 2.43E-10 | 1162.92      | 843.06       | 959.49       | 1327.26      | 15399.65   | 14243.17   | 15041.78   | 15659.93   | 3027.22   | 3276.49   | 2949.41   | 2416.29   |
| 505.2044 | 1.12E-11 | 2.69E-10 | 12047.93     | 11752.10     | 12245.30     | 11836.92     | 13085.81   | 12018.01   | 12507.49   | 12992.23   | 50074.10  | 49923.18  | 46572.72  | 46533.64  |
| 697.2875 | 1.23E-11 | 2.93E-10 | 10829.45     | 10602.66     | 11023.48     | 10145.01     | 1424.25    | 1878.23    | 1172.45    | 1075.93    | 11228.31  | 10839.46  | 10960.75  | 10937.23  |

| m/z      | p.value  | FDR      | Salmonella-1 | Salmonella-2 | Salmonella-3 | Salmonella-4 | Shigella_1 | Shigella_2 | Shigella_3 | Shigella_4 | E.coli_1  | E.coli_2  | E.coli_3  | E.coli_4  |
|----------|----------|----------|--------------|--------------|--------------|--------------|------------|------------|------------|------------|-----------|-----------|-----------|-----------|
| 839.2022 | 1.35E-11 | 3.13E-10 | 91.63        | 391.88       | 384.23       | 407.30       | 7232.61    | 7265.22    | 6587.62    | 6900.73    | 1630.27   | 1616.00   | 1556.20   | 1714.54   |
| 688.1265 | 1.35E-11 | 3.13E-10 | 12822.90     | 13378.15     | 13278.36     | 12734.30     | 3717.48    | 3894.85    | 3387.43    | 4103.16    | 1559.35   | 1031.18   | 2072.23   | 1366.49   |
| 425.0440 | 1.39E-11 | 3.16E-10 | 5497.88      | 5966.26      | 6205.84      | 5968.94      | 21137.41   | 22109.11   | 22526.17   | 22075.40   | 8099.15   | 9006.40   | 9347.23   | 9237.57   |
| 842.2051 | 1.40E-11 | 3.16E-10 | 702.96       | 735.98       | 741.83       | 642.31       | 8908.74    | 9738.27    | 9399.30    | 8851.54    | 2885.19   | 2798.08   | 2518.46   | 2787.98   |
| 949.4322 | 1.46E-11 | 3.26E-10 | 3754.44      | 4229.86      | 3859.70      | 4173.37      | 14570.35   | 15287.49   | 15033.03   | 15971.89   | 4305.52   | 4024.61   | 4444.22   | 4327.32   |
| 686.1251 | 1.53E-11 | 3.37E-10 | 25810.93     | 26046.04     | 27270.30     | 26989.63     | 8081.00    | 8655.25    | 7594.66    | 8971.52    | 3767.14   | 3831.07   | 4794.29   | 5352.77   |
| 564.7208 | 1.59E-11 | 3.47E-10 | 13983.59     | 15655.34     | 14856.04     | 16290.44     | 201.57     | 0.00       | 143.41     | 0.00       | 22039.32  | 22935.23  | 23330.63  | 23528.49  |
| 993.3564 | 1.84E-11 | 3.96E-10 | 2442.41      | 2205.81      | 1803.37      | 2407.98      | 20605.51   | 21130.66   | 20732.99   | 21803.36   | 3909.03   | 5298.36   | 5906.75   | 5518.63   |
| 631.3279 | 1.96E-11 | 4.12E-10 | 118.51       | 0.00         | 125.55       | 98.39        | 6074.05    | 6344.30    | 6757.76    | 6009.19    | 382.70    | 506.24    | 362.07    | 644.77    |
| 561.4274 | 1.96E-11 | 4.12E-10 | 5561.67      | 5430.25      | 5668.20      | 5318.70      | 573.61     | 807.90     | 852.53     | 582.12     | 5493.43   | 5460.62   | 5178.67   | 5659.69   |
| 776.3494 | 2.00E-11 | 4.16E-10 | 0.00         | 0.00         | 98.74        | 93.35        | 10772.01   | 9712.19    | 10984.36   | 10737.79   | 2205.32   | 2436.99   | 2410.55   | 2465.75   |
| 471.3004 | 2.07E-11 | 4.25E-10 | 0.00         | 0.00         | 108.48       | 0.00         | 5253.22    | 6000.52    | 5697.71    | 5922.13    | 115.66    | 119.31    | 201.47    | 0.00      |
| 822.4432 | 2.11E-11 | 4.30E-10 | 1756.93      | 1979.71      | 1838.67      | 2236.32      | 5398.06    | 5613.04    | 5492.66    | 5341.05    | 711.77    | 835.67    | 931.51    | 805.41    |
| 544.1194 | 2.23E-11 | 4.48E-10 | 58609.53     | 66841.16     | 71400.27     | 76818.28     | 350579.28  | 339277.12  | 346836.06  | 376564.01  | 41224.60  | 44561.34  | 49103.17  | 49563.82  |
| 745.2965 | 2.65E-11 | 5.27E-10 | 9802.16      | 9666.72      | 9504.67      | 9245.17      | 195.31     | 540.65     | 403.22     | 440.23     | 13477.36  | 15092.96  | 14902.91  | 14294.54  |
| 464.1396 | 2.75E-11 | 5.41E-10 | 79654.13     | 85955.95     | 81154.73     | 87867.95     | 58562.14   | 56103.59   | 56227.99   | 58088.27   | 4660.26   | 3983.09   | 5888.11   | 7475.01   |
| 836.3278 | 2.87E-11 | 5.58E-10 | 464823.10    | 471604.76    | 471851.33    | 477076.06    | 107826.53  | 102390.00  | 105225.99  | 106214.84  | 667584.39 | 656182.54 | 605508.72 | 619250.64 |
| 534.3078 | 3.85E-11 | 7.42E-10 | 22130.24     | 20465.86     | 19892.30     | 20567.42     | 1632.95    | 1754.70    | 2169.10    | 1249.00    | 32651.97  | 30956.66  | 30488.56  | 29438.66  |
| 562.7862 | 4.09E-11 | 7.80E-10 | 105.51       | 266.00       | 320.56       | 302.76       | 9541.95    | 8921.28    | 9927.80    | 10198.73   | 1199.45   | 1070.19   | 1464.39   | 1403.66   |
| 495.0902 | 4.71E-11 | 8.85E-10 | 9316.46      | 10129.00     | 9986.77      | 10463.40     | 1961.36    | 1640.75    | 1662.45    | 2263.33    | 961.59    | 733.25    | 665.75    | 945.67    |
| 534.2690 | 4.74E-11 | 8.85E-10 | 13989.45     | 13523.85     | 14706.99     | 14580.20     | 1075.01    | 1026.95    | 527.31     | 664.08     | 15099.09  | 16093.11  | 16195.25  | 14732.73  |
| 874.3415 | 5.39E-11 | 9.96E-10 | 16777.55     | 16874.13     | 17220.53     | 16638.12     | 10489.60   | 10564.11   | 9002.23    | 9218.09    | 2229.89   | 2283.27   | 2037.28   | 2293.77   |

**Table S7.** Metadata of patients for the pooled fecal and plasma sample.

| Patient       | Gender | Age | MRI            | Other                         |
|---------------|--------|-----|----------------|-------------------------------|
| <b>Fecal</b>  |        |     |                |                               |
| 060           | Male   | 52  | NAD            |                               |
| 043           | Male   | 62  | BD-<br>IPMN    | Lynch Syndrome                |
| 056           | Female | 66  | Cyst           |                               |
| 046           | Female | 37  | NAD            | Hepatomegaly and splenomegaly |
| 063           | Male   | 68  | NAD            |                               |
| 068           | Male   | 67  | MF BD-<br>1PMN | Polyarthritis                 |
| 058           | Female | 62  | MF BD-<br>1PMN |                               |
| 047           | Female | 53  | BD-<br>1PMN    |                               |
| <b>Plasma</b> |        |     |                |                               |
| 039           | Female | 52  | N/A            | N/A                           |

NAD- No acute distress

IPMN- Intraductal Papillary Mucinous Neoplasm

BD- Branch Duct

MF- Multifocal

### 3. General

All reagents and solvents were purchased from Sigma-Aldrich or Fischer Scientific and were used without further purification. Mass spectrometry grade solvents were used for UHPLC-ESI-MS analysis. Solutions were concentrated *in vacuo* on a Heidolph. Thin Layer Chromatography (TLC) was performed on silica gel 60 F-254 plates. Visualization of the developed chromatogram was performed using fluorescence quenching. Chromatographic purification of products was accomplished using flash column chromatography on Merck silica gel 60 (40–63  $\mu\text{m}$ ). NMR spectra were recorded on Agilent 400 MHz spectrometer (1H NMR: 400 MHz, 13C NMR: 100 MHz). Chemical shifts are reported in parts per million (ppm) on the  $\delta$  scale from an internal standard. Multiplicities are abbreviated as follows: s = singlet, d = doublet, t = triplet, q = quartet, m = multiplet. Glass vials used for handling magnetic beads were microwave vials from Biotage (0.2-0.5 mL or 0.5-2.0 mL). The UHPLC-MS/MS analysis was performed in a Maxis II ETD Q-TOF mass spectrometer using an electrospray ionization (ESI) source with an Elute UHPLC system and equipped with a Waters ACQUITY UPLC BEH C18 column (2.1  $\times$  75 mm, 1.7  $\mu\text{m}$  particle size) or Waters ACQUITY UPLC HSS T3 column (1.8  $\times$  100 mm, 2.1  $\mu\text{m}$  particle size). Milli-Q water with 0.1% formic acid was used as mobile phase A and LC-MS grade methanol with 0.1% formic acid was used as mobile phase B. The column temperature was kept at 40  $^{\circ}\text{C}$ , and the autosampler was kept at 4  $^{\circ}\text{C}$ . The flow rate was set to 0.22 mL/min. The gradient used was as follows: 0–2 min, 0% B; 2–15 min, 0–100% B; 15–16 min, 100% B; 16–17 min, 100-0% B; 17–23 min, 0% B. The system was controlled using the Compass HyStar software package from Bruker. High-resolution mass spectra were acquired in positive mode at a mass range of  $m/z$  50–1200. Data acquisition was performed in MSE mode or AutoMSMS.

## 4. Synthetic procedures

### Preparation of compound 5

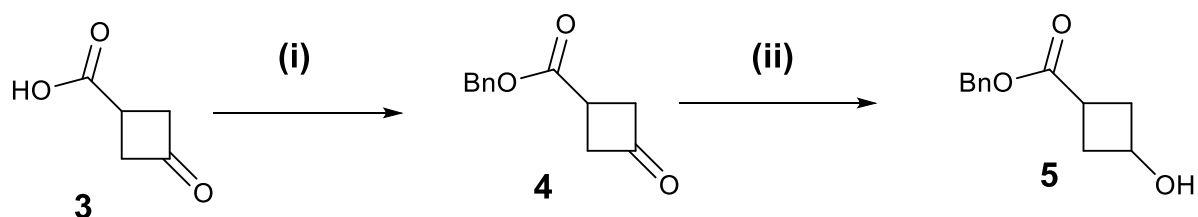

Compound 5 was prepared from the carboxylic acid 3 according to procedure described in literature.<sup>1</sup>

<sup>1</sup>H NMR (400 MHz, CDCl<sub>3</sub>) of 5: δ 2.15-2.26 (m, 2H), 2.57-2.71 (m, 3H), 4.15-4.24 (m, 1H), 5.12 (s, 2H), 7.30-7.39 (m, 5H).

### Preparation of compound 6

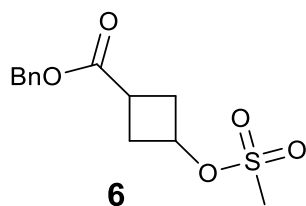

### Benzyl 3-((methylsulfonyl)oxy)cyclobutane-1-carboxylate (6)

The solution of 5 (1.5 g, 7.47 mmol, 1 equiv.) in dry DCM (15 mL) was cooled to 0 °C and triethylamine (1.56 mL, 11.20 mmol, 1.5 equiv.) was added. Methanesulfonyl chloride (693 μL, 8.96 mmol, 1.2 equiv.) was added dropwise at 0 °C. This reaction mixture was stirred under nitrogen for 30 minutes while allowing it to warm to room temperature. The TLC analysis at this point showed the complete exhaustion of the starting material. Half-saturated sodium bicarbonate was added and the aqueous phase was extracted four times with DCM. The combined organic layers were dried over Na<sub>2</sub>SO<sub>4</sub>, filtered and concentrated *in vacuo*. The yellow oil was column chromatographed on silica gel (gradient 5% to 25% ethyl acetate/hexane) to give a slight yellow solid of 6 (1.8 g). Yield = 85%.

<sup>1</sup>H NMR (400 MHz, CDCl<sub>3</sub>): δ 2.55-2.64 (m, 2H), 2.67-2.84 (m, 3H), 2.99 (s, 3H), 4.89-4.97 (m, 1H), 5.14 (s, 2H), 7.31-7.40 (m, 5H).



### Preparation of compound 7

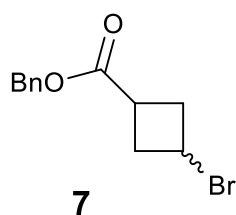

#### Benzyl 3-bromocyclobutane-1-carboxylate (7)

A mixture of **6** (1.8 g, 6.33 mmol, 1 equiv.) and lithium bromide (713 mg, 8.21 mmol, 1.3 equiv.) in dry DMF (20 mL) was stirred overnight at 80 °C. The TLC analysis of the reaction mixture in toluene: acetone (3:1) indicated the complete exhaustion of the starting material. The reaction was cooled down to the room temperature. Saturated sodium bicarbonate was added and the mixture was stirred for 30 minutes at room temperature. The aqueous layer was extracted thrice with ethyl acetate. The combined organic layers were dried over Na<sub>2</sub>SO<sub>4</sub>, filtered and concentrated *in vacuo*. The yellow oil was column chromatographed on silica gel (gradient 1 % to 2 % ethyl acetate/hexane) to give an oil of **7** (559 mg). Yield = 33 %. The H-NMR indicated the product **7** contained the diastereomers in the ratio of 2:5.

<sup>1</sup>H NMR (400 MHz, CDCl<sub>3</sub>) of diastereomeric mixture: δ 2.67- 3.06 (m, 7H), 3.39-3.47 (m, 0.43H), 4.34-4.42 (m, 1H), 4.62-4.69 (m, 0.43H), 5.13-5.14 (m, 3H), 7.31-7.40 (m, 7H).

<sup>1</sup>H NMR (400 MHz, CDCl<sub>3</sub>) of major diastereomer: δ 2.73- 2.91 (m, 4H), 2.98- 3.06 (m, 1H), 4.34-4.42 (m, 1H), 5.13 (s, 2H), 7.31-7.40 (m, 5H).

<sup>1</sup>H NMR (400 MHz, CDCl<sub>3</sub>) of minor diastereomer: δ 2.67- 2.74 (m, 2H), 2.91-2.97 (m, 2H), 3.40-3.47 (m, 1H), 4.63-4.70 (m, 1H), 5.14 (s, 2H), 7.32- 7.39 (m, 5 H).

### Preparation of compound **8**

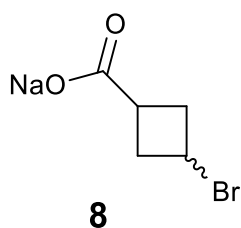

### Sodium 3-bromocyclobutane-1-carboxylate (**8**)

To the solution of **7** (559 mg, 2.08 mmol, 1 equiv.) in THF (7 mL) was added 5N NaOH (420  $\mu$ L) and the mixture was stirred overnight at 45 °C. The mixture was cooled to room temperature and the volatiles were removed *in vacuo* to give an off-white solid of **8**. This solid was used in the next step without further purification.

$^1\text{H}$  NMR (400 MHz,  $\text{CD}_3\text{OD}$ ):  $\delta$  2.52-2.68 (m, 3.33H), 2.77-2.93 (m, 4.20H), 3.28-3.36 (m, 0.33H), 4.45-4.53 (m, 1H), 4.63-4.70 (m, 0.40 H).

### Preparation of compound **10**

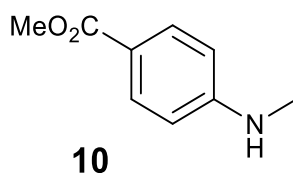

### Methyl 4-(methylamino)benzoate (**10**)

A mixture of 4-(methylamino)benzoic acid (1.0 g, 6.62 mmol, 1 equiv.) and 4-methylbenzenesulfonic acid (1.5 g, 8.71 mmol, 1.3 equiv.) in methanol (20 mL) was refluxed overnight at 70 °C. The TLC analysis of the reaction mixture indicated the complete exhaustion of the starting material after 16 h of refluxing. Methanol was removed *in vacuo*. Saturated sodium bicarbonate was added and the aqueous layer was extracted thrice with ethyl acetate. The combined organic layers were dried over  $\text{Na}_2\text{SO}_4$ , filtered and concentrated *in vacuo*. The residue was column chromatographed on silica gel (gradient 5 % to 10 % ethyl acetate/hexane) to give a slight yellow solid of **10** (808 mg). Yield = 74%.

$^1\text{H}$  NMR (400 MHz,  $\text{CDCl}_3$ ):  $\delta$  2.88 (s, 3H), 3.85 (s, 3H), 6.55 (d,  $J$  = 9.2 Hz, 2H), 7.87 (d,  $J$  = 8.8 Hz, 2H).

*Preparation of compound 9*

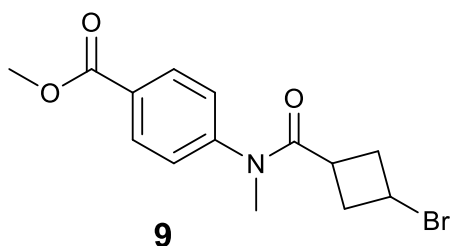

**Methyl 4-(3-bromo-N-methylcyclobutane-1-carboxamido) benzoate (9)**

To a stirred solution of **8** (700 mg, 6.13 mmol, 1.2 equiv.) in dry DMF (15 mL) was added propanephosphonic acid anhydride (50 wt% in ethyl acetate, 14 mL, 22.25 mmol, 7 equiv.) and *N,N*- diisopropylethylamine (4 mL, 22.25 mmol, 7 equiv.). Methyl 4-(methylamino) benzoate **10** (525 mg, 3.18 mmol, 1 equiv.) in ethyl acetate (15 mL) was added. This reaction solution was refluxed overnight at 80 °C. The TLC and LCMS analyses after the overnight stirring indicated the presence of both the starting material and the desired product. The reaction was allowed to cool down to room temperature and saturated sodium bicarbonate was added. This mixture was stirred for 30 minutes at room temperature. The aqueous layer was extracted five times with ethyl acetate. The combined organic layers were dried over Na<sub>2</sub>SO<sub>4</sub>, filtered and concentrated *in vacuo*. The residue was column chromatographed on silica gel (gradient 5% to 12.5% ethyl acetate/petroleum ether) to give a yellow oil of **9** (538 mg). Yield = 54%.

<sup>1</sup>H NMR (400 MHz, CDCl<sub>3</sub>): δ 2.30-2.52 (m, 2H), 2.73-2.80 (m, 3H), 3.28 (s, 3H), 3.94 (s, 3H), 4.11-4.20 (m, 1H), 7.19 (d, *J* = 8.4 Hz, 2H), 8.09 (d, *J* = 8.6 Hz, 2H).

<sup>13</sup>C NMR (100 MHz, CDCl<sub>3</sub>): δ 35.5, 37.2, 37.6, 38.7, 52.5, 127.2, 131.3, 147.5, 166.2, 171.8.

HRMS (ESI) *m/z* [M+H]<sup>+</sup> calcd for C<sub>14</sub>H<sub>17</sub>BrNO<sub>3</sub> 326.0386; Found 326.0389.

*Preparation of compound 11*

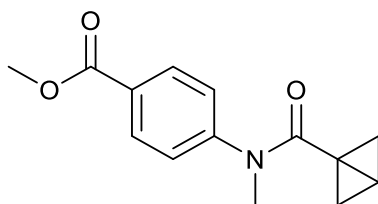

**11**

**Methyl 4-(N-methylbicyclo[1.1.0]butane-1-carboxamido)benzoate (11)**

To a stirred solution of **9** (538 mg, 1.65 mmol, 1 equiv.) in dry toluene (10 mL) was added lithium bis(trimethylsilyl)amide (1M in THF, 11.3 mL) at 0 °C. This mixture was stirred under nitrogen for 1 h at 0 °C. The TLC analysis of the reaction mixture indicated the complete exhaustion of the starting material. Saturated ammonium chloride was added and the aqueous layer was extracted three times with ethyl acetate. The combined organic layers were dried over Na<sub>2</sub>SO<sub>4</sub>, filtered and concentrated *in vacuo*. The residue was column chromatographed on silica gel (gradient 5 % to 20 % ethyl acetate/hexane) to give an off-white solid of **11** (345.8 mg). Yield = 85%.

<sup>1</sup>H NMR (400 MHz, CDCl<sub>3</sub>): δ 0.85 (d, *J* = 2.8 Hz, 2H), 1.87 (d, *J* = 3.2 Hz, 2H), 2.08-2.11 (m, 1H), 3.39 (s, 3H), 3.93 (s, 3H), 7.35 (d, *J* = 8.4 Hz, 2H), 8.05 (d, *J* = 8.4 Hz, 2H).

<sup>13</sup>C NMR (100 MHz, CDCl<sub>3</sub>): δ 10.3, 18.5, 37.6, 52.4, 126.3, 127.8, 130.7, 149.4, 166.5, 172.0.

HRMS (ESI) *m/z* [M+H]<sup>+</sup> calcd for C<sub>14</sub>H<sub>16</sub>NO<sub>3</sub> 246.1125; Found 246.1127.

Preparation of compound **12**

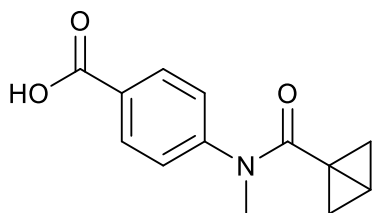

**12**

**4-(N-methylbicyclo[1.1.0]butane-1-carboxamido)benzoic acid (12)**

To the solution of **11** (44 mg, 0.18 mmol, 1 equiv.) in MeOH/ water (1:1, 10 mL) was added sodium carbonate (400 mg, 3.77 mmol, 21 equiv.). This mixture was stirred overnight at 50 °C. The volatile components were removed *in vacuo*. The solution was cooled to 0 °C and acidified to pH 4-5 with 1 M HCl. The cold aqueous layer was extracted five times with ethyl acetate. The combined organic layers were dried over Na<sub>2</sub>SO<sub>4</sub>, filtered and concentrated *in vacuo* to give an off-white solid of **12** (38 mg). Yield = 92%.

<sup>1</sup>H NMR (400 MHz, CD<sub>3</sub>OD): δ 0.86 (d, *J* = 2.4 Hz, 2H), 1.85 (d, *J* = 3.3 Hz, 2H), 2.15-2.18 (m, 1H), 3.38 (s, 3H), 7.45 (d, *J* = 8.6 Hz, 2H), 8.07 (d, *J* = 8.6 Hz, 2H).

<sup>13</sup>C NMR (100 MHz, CD<sub>3</sub>OD): δ 10.8, 19.0, 38.0, 38.1, 127.7, 130.3, 131.8, 150.1, 169.1, 174.2.

HRMS (ESI) *m/z* [M+H]<sup>+</sup> calcd for C<sub>13</sub>H<sub>14</sub>NO<sub>3</sub> 232.0968; Found 232.0965.

Compounds **13** and **14** were synthesized according to procedures described in literature.<sup>2</sup>

Preparation of compound **2**

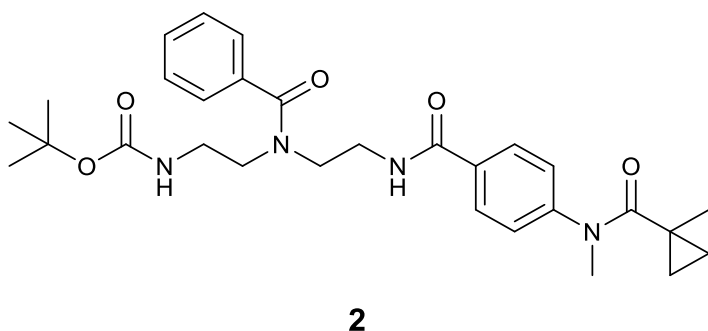

**tert-Butyl (2-(N-(2-(4-(N-methylbicyclo[1.1.0]butane-1-carboxamido)ethyl)benzamido)ethyl)benzamido)ethyl carbamate (2)**

To a stirred solution of **12** (30 mg, 0.13 mmol, 1 equiv.) in dry DMF was added propanephosphonic acid anhydride (50 wt% in ethyl acetate, 90  $\mu$ L, 0.14 mmol, 1.1 equiv.), *N,N*-diisopropylethylamine (70  $\mu$ L, 0.40 mmol, 3.1 equiv.) and *tert*-butyl (2-(*N*-(2-aminoethyl)benzamido)ethyl)carbamate **14** (48 mg, 0.14 mmol, 1.2 equiv.). After stirring the reaction overnight under nitrogen at room temperature, the TLC analysis showed the complete exhaustion of the starting material. Saturated sodium bicarbonate was added to the reaction mixture and stirring was continued for 30 minutes. The aqueous layer was extracted five times with ethyl acetate. The combined organic layers were dried over  $\text{Na}_2\text{SO}_4$ , filtered and concentrated *in vacuo*. The residue was column chromatographed on silica gel (isocratic 4% methanol/dichloromethane) to give a white solid of **2** (29 mg). Yield = 43%.

$^1\text{H}$  NMR (400 MHz,  $\text{CDCl}_3$ ):  $\delta$  0.81 (s, 2H), 1.42 (s, 9H), 1.83 (s, 2H), 2.07 (s, 1H), 3.26-3.88 (m, 11H), 7.31-7.37 (m, 5H), 7.56 (s, 1H), 7.85-7.95 (m, 3H).

$^{13}\text{C}$  NMR (100 MHz,  $\text{CDCl}_3$ ):  $\delta$  10.2, 18.2, 28.5, 29.8, 37.5, 37.8, 39.0, 40.2, 44.9, 49.8, 53.6, 79.9, 126.4, 126.6, 127.2, 128.2, 128.6, 129.8, 131.7, 136.1, 148.1, 148.6, 164.9, 166.9, 171.9, 174.5.

HRMS (ESI)  $m/z$   $[\text{M}+\text{H}]^+$  calcd for  $\text{C}_{29}\text{H}_{37}\text{N}_4\text{O}_5$  521.2759; Found 521.2758.

Preparation of compound **1a**

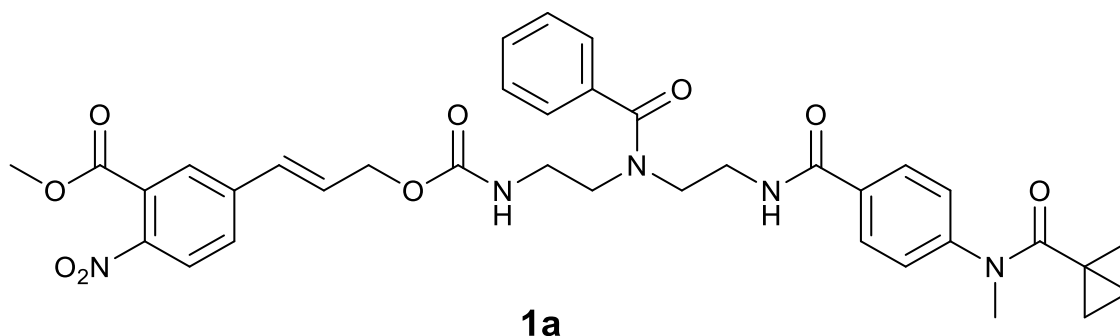

**Methyl (E)-5-(5-benzoyl-1-(4-(N-methylbicyclo[1.1.0]butane-1-carboxamido)phenyl)-1,9-dioxo-10-oxa-2,5,8-triazatridec-12-en-13-yl)-2-nitrobenzoate (1a)**

To the stirred solution of **12** (25 mg, 0.11 mmol, 1 equiv.) in dry DMF (5 mL) was added propanephosphonic acid anhydride (50 wt% in ethyl acetate, 110  $\mu$ L, 0.16 mmol, 1.5 equiv.), *N,N*-diisopropylethylamine (57  $\mu$ L, 0.32 mmol, 3.0 equiv.) and **13** (56 mg, 0.12 mmol, 1.1 equiv.). This reaction mixture was sealed, flushed with nitrogen and stirred for 21 h at room temperature. Saturated sodium bicarbonate was added and stirring was continued for 30 minutes. The aqueous layer was extracted four times with ethyl acetate. The combined organic layers were dried over  $\text{Na}_2\text{SO}_4$ , filtered and concentrated *in vacuo*. The residue was column chromatographed on silica gel (gradient 1 % to 4 % methanol/dichloromethane) to give a white solid of **1a** (29 mg). Yield = 23%.

$^1\text{H}$  NMR (400 MHz,  $\text{CDCl}_3$ ):  $\delta$  0.79 (s, 2H), 1.83 (s, 2H), 2.06 (s, 1H), 3.35-3.92 (m, 14H), 4.62-4.71 (m, 2H), 6.42-6.46 (m, 1H), 6.65 (d,  $J = 15.6$  Hz, 1H), 7.07-7.92 (m, 12H).

$^{13}\text{C}$  NMR (100 MHz,  $\text{CDCl}_3$ ):  $\delta$  10.2, 18.2, 29.8, 37.6, 37.7, 39.7, 40.1, 45.1, 49.9, 53.5, 64.8, 124.4, 124.8, 126.4, 126.6, 127.5, 128.1, 128.7, 128.8, 129.2, 129.8, 131.5, 136.0, 141.7, 146.7, 148.2, 156.1, 166.2, 167.2, 171.9, 174.4.

HR-MS (ESI)  $m/z$   $[\text{M}+\text{H}]^+$  calcd for  $\text{C}_{36}\text{H}_{38}\text{N}_5\text{O}_9$  684.2665; Found 684.2655.

### Preparation of compound 1

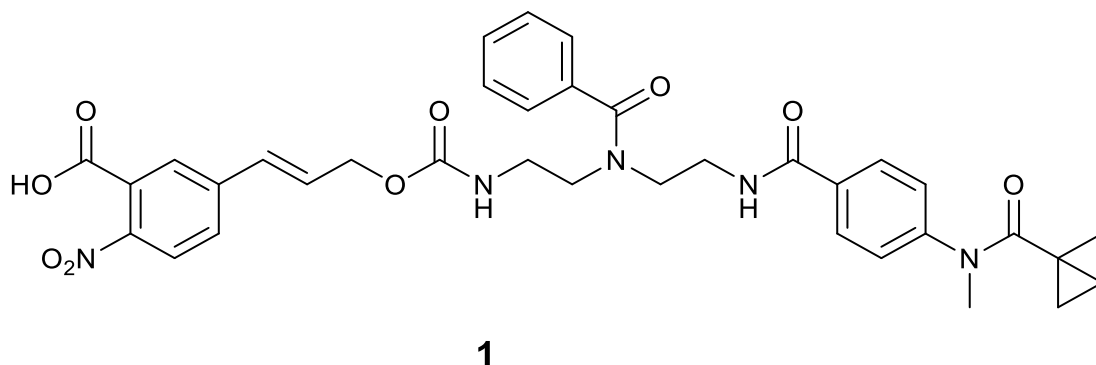

### (E)-5-(5-benzoyl-1-(4-(N-methylbicyclo[1.1.0]butane-1-carboxamido)phenyl)-1,9-dioxo-10-oxa-2,5,8-triazatridec-12-en-13-yl)-2-nitrobenzoic acid (1)

To the solution of **1a** (6 mg, 8.78  $\mu$ mol) in methanol/ water (1:1, 2 mL) was added lithium hydroxide (150  $\mu$ L, 2M solution in water). This was stirred for 30 minutes at room temperature. After the complete consumption of the starting material was confirmed by the TLC analysis, the volatiles were removed *in vacuo*. The reaction solution was cooled to 0  $^{\circ}$ C and acidified to pH 4-5 with 1 M HCl. The cold aqueous layer was extracted three times with ethyl acetate. The combined organic layers were dried over Na<sub>2</sub>SO<sub>4</sub>, filtered and concentrated *in vacuo* to give an off-white solid of **1** (5 mg, yield = 86 %). This solid was treated with the amine-derivatized magnetic beads without further purification.

<sup>1</sup>H NMR (400 MHz, CD<sub>3</sub>OD):  $\delta$  0.82 (d,  $J$  = 21.6 Hz, 2H), 1.83 (d,  $J$  = 15.6 Hz, 2H), 2.14-2.17 (m, 1H), 3.24- 3.84 (m, 11H), 4.67-4.79 (m, 2H), 6.54-6.61 (m, 1H), 6.71-6.78 (m, 1H), 7.26-7.44 (m, 7H), 7.57-7.89 (m, 5H).

HR-MS (ESI)  $m/z$  [M+H]<sup>+</sup> calcd for C<sub>35</sub>H<sub>36</sub>N<sub>5</sub>O<sub>9</sub> 670.2508; Found 670.2503.

### Synthesis of reduced lipoic acid

The method was adapted from procedure reported in literature.<sup>3</sup>

To a solution of ( $\pm$ )- $\alpha$ -lipoic acid (1.0 g) in 0.25 N sodium bicarbonate (19.5 mL), a total of 0.2 g of sodium borohydride was added portion wise. The mixture was well stirred and kept below 5  $^{\circ}$ C. After 30 minutes of stirring, toluene (16 mL) was added, and the colorless reaction was acidified to pH 1 with ice cold 5 N HCl. The content of the toluene layer was concentrated *in vacuo* to yield 0.7 g of reduced lipoic acid: lipoic acid in the ratio of 1:0.23.



$^1\text{H}$  NMR (400 MHz,  $\text{CDCl}_3$ ):  $\delta$  1.29-1.37 (m, 1H), 1.43-1.79 (m, 7H), 1.87-1.95 (m, 1H), 2.36-2.40 (m, 2H), 2.43-2.50 (m, 0.25H), 2.62-2.82 (m, 2H), 2.86-2.97 (m, 1H), 3.08-3.22 (m, 0.45H), 3.54-3.61 (m, 0.23H).

*Preparation of 1-butanethiol-probe conjugate TCP11 for the LOD determination*

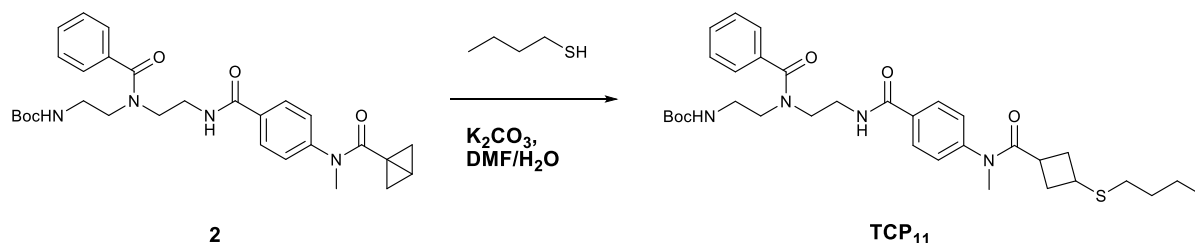

To compound **2** (12 mg, 23  $\mu\text{mol}$ ) in DMF (1 mL) was added aqueous potassium carbonate (1 mL, 129 mM). 1-Butanethiol (20  $\mu\text{L}$ , 173  $\mu\text{mol}$ ) was added and the reaction was stirred overnight at room temperature. Aqueous sodium bicarbonate solution was added and the mixture was stirred under nitrogen for 1 h. The aqueous layer was extracted four times with ethyl acetate, and the combined organic layers were dried over  $\text{Na}_2\text{SO}_4$ , filtered, and concentrated *in vacuo* to give a yellow oil. This was column chromatographed on silica gel (isocratic 6% methanol/dichloromethane) to give an off-white solid of **TCP11** (7 mg). Yield = 50%.

$^1\text{H}$  NMR (400 MHz,  $(\text{CD}_3)_2\text{SO}$ ):  $\delta$  0.83 (t, 3H,  $J = 7.2$  Hz), 1.23-1.44 (m, 13H), 1.98-2.11 (m, 3H), 2.36-2.42 (m, 2H), 2.99-3.04 (m, 2H), 3.16-3.63 (m, 12H), 7.30-7.38 (m, 7H), 7.79-7.89 (m, 2H).

$^1\text{H}$  NMR (400 MHz,  $\text{CDCl}_3$ ):  $\delta$  0.88 (t, 3H,  $J = 7.2$  Hz), 1.42 (s, 9H), 1.50- 3.88 (m, 24H), 7.16-7.90 (m, 9H).

$^{13}\text{C}$  NMR (100 MHz,  $\text{CDCl}_3$ ):  $\delta$  13.8, 22.2, 28.5, 29.9, 30.5, 31.3, 32.0, 32.4, 33.2, 34.5, 34.6, 35.1, 35.7, 37.5, 40.6, 50.0, 50.1, 126.5, 127.2, 127.4, 128.9, 129.9, 135.9, 136.0, 152.6, 173.2.

HRMS (ESI)  $m/z$   $[\text{M}+\text{H}]^+$  calcd for  $\text{C}_{33}\text{H}_{47}\text{N}_4\text{O}_5\text{S}$  611.3262; Found 611.3255.

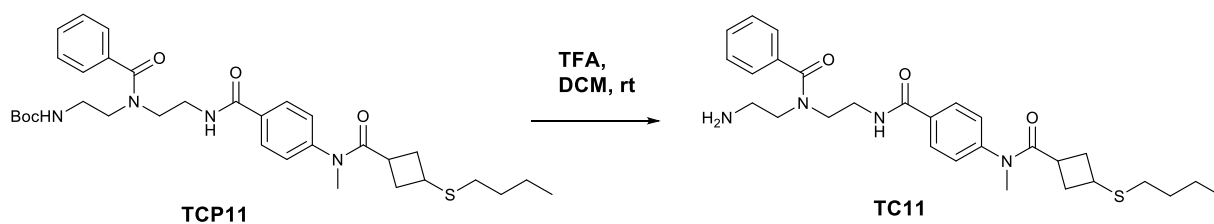

To compound **TCP11** (2.5 mg, 4  $\mu\text{mol}$ ) in DCM (2 mL) was added trifluoroacetic acid (100  $\mu\text{L}$ ) and stirred overnight at room temperature. After the completion of reaction was confirmed by TLC, the volatiles were removed *in vacuo*. The resulting residue was dissolved in methanol to obtain a solution of 20 mM. This solution was further diluted to different concentrations with 5 % acetonitrile/ water and the LODs of the solutions were measured.

*Preparation of Boc-protected cysteine persulfide conjugate **TCP21** for the LC-MS analysis*

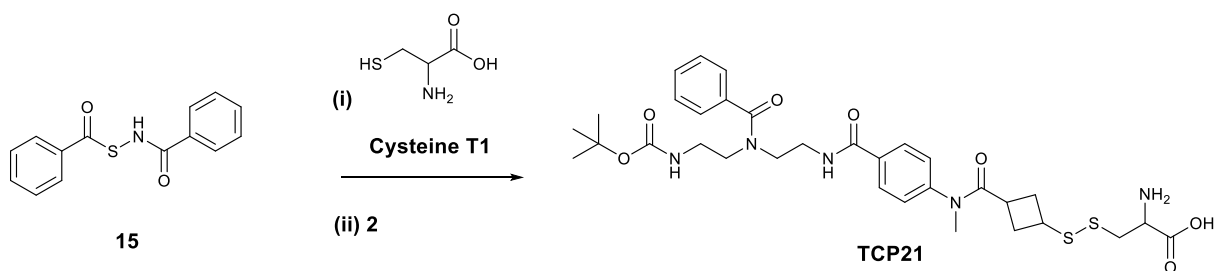

Compound **15** was synthesized according to procedure reported in literature.<sup>4</sup>

<sup>1</sup>H NMR (400 MHz, CDCl<sub>3</sub>) of **15**:  $\delta$  7.49-7.53 (m, 4H), 7.55-7.61 (m, 1H), 7.63-7.67 (m, 1H), 7.93 (d,  $J = 7.6$  Hz, 1H).

To compound **15** (11.1  $\mu\text{l}$ , 80 mM in THF) was added L-cysteine **T1** (200  $\mu\text{l}$ , 400 mM in PBS) and stirred at room temperature for 2 minutes. Probe **2** (200  $\mu\text{L}$ , 4.8 mM in THF) was added dropwise over 10 minutes. The reaction mixture was analyzed using UHPLC-MS at time-points 5 min, 10 min, 15 min, 20 min and 1 h.

## 5. Methods

### 5.1 Preparation of immobilized probe A

Magnabind amine derivatized beads (50  $\mu\text{L}$ , Thermo Scientific<sup>TM</sup>) solution was taken in a 1.5 mL Eppendorf tube. Original solution from the supplier was removed using magnetic separation. The beads were washed with THF (2 x 200  $\mu\text{L}$ ) followed by DMF (1 x 200  $\mu\text{L}$ ). To the washed beads, DMF (200  $\mu\text{L}$ ) and DIPEA (5  $\mu\text{L}$ ) were added, and vortexed for 30 s. This solution was removed using the magnetic separation. The beads were washed with DMF (1 x 200  $\mu\text{L}$ ). To the washed beads, an amide coupling solution (13.5 mM PyBOP, 13.3 mM HOBt, 100  $\mu\text{L}$  DMF), DIPEA (5  $\mu\text{L}$ ) and compound **1** (8.9 mM, 100  $\mu\text{L}$  DMF) were added. This mixture was incubated using a Thermomixer (1,500 rpm, 30  $^{\circ}\text{C}$ , 16 h). The solution was removed using the magnetic separation and the beads were washed with DMF (2 x 200  $\mu\text{L}$ ). The beads were suspended in DMF (100  $\mu\text{L}$ ) and utilized for the biological sample treatment.

### 5.2 Preparation of LC-MS standard of TC21

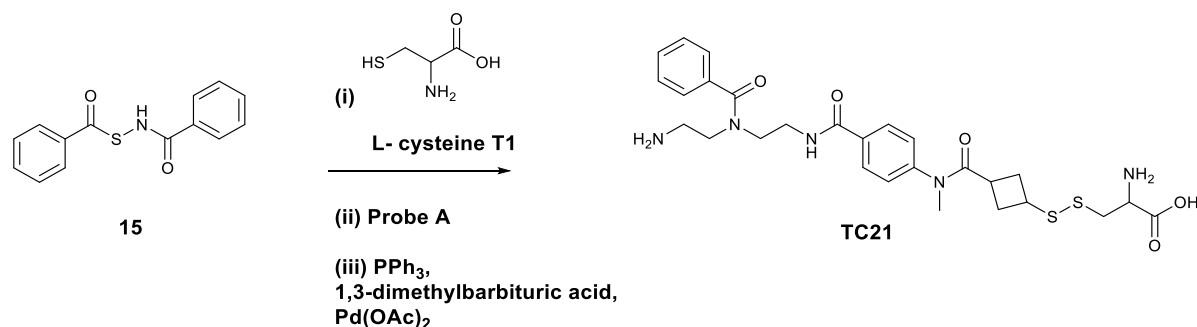

To compound **15** (11.1  $\mu\text{l}$ , 80 mM in THF) was added L-cysteine **T1** (200  $\mu\text{l}$ , 400 mM in PBS) and stirred at room temperature for 2 minutes. Magnetic bead-bound probe **A** (50  $\mu\text{L}$ ) was added to the reaction mixture and stirred at 30  $^{\circ}\text{C}$ . At the reaction intervals of 10 min and 60 min, 25  $\mu\text{L}$  of the reaction mixture was transferred to a glass vial and incubated with triphenylphosphine (48.5  $\mu\text{L}$ , 12.9 mM in THF), 1,3-dimethylbarbituric acid (45.0  $\mu\text{L}$ , 30.7 mM in THF), and  $\text{Pd}(\text{OAc})_2$  solution (42.0  $\mu\text{L}$ , 6.53 mM in THF) at 25  $^{\circ}\text{C}$  for 16 h. The supernatants were separated from the beads using magnetic separation. The supernatants were concentrated *in vacuo*. The residues were redissolved in LCMS-grade methanol (15  $\mu\text{L}$ ) and triphenylphosphine and triphenylphosphine oxide were precipitated through the addition of water (60  $\mu\text{L}$ ). The suspension was centrifuged in a benchtop centrifuge (12,000 g, 5 min). The supernatants were transferred into Eppendorf tubes and concentrated *in vacuo*. The residues were dissolved in 25  $\mu\text{L}$  of LCMS-grade methanol, diluted to 1:3 with 5% v/v acetonitrile/water and analyzed by UHPLC-MS.

### 5.3 Preparation of fecal metabolite extracts

A scalpel was used to collect approximately 60 mg of the frozen fecal sample from eight different patients (stored at - 80 °C) in specialized tube D (MP Biomedicals). Ultrapure water (100 µL) and LCMS-grade methanol (400 µL) were added to each tube. The mixtures were vortexed and homogenized by a FastPrep 24 homogenizer (3 cycles, 6 m/s, 40 s, MP Biomedicals). The mixtures were transferred from tube D to Eppendorf tubes and stored at - 20 °C for 1 h. The mixtures were centrifuged (17,500 g, 5 min, 4 °C). The supernatants were collected, combined and the solvent was removed *in vacuo*. The dried extract was dissolved in DMF (380 µL) and treated with the immobilized probe A.

### 5.4 Preparation of plasma metabolite extracts

Ice cold methanol (200 µL) was added to plasma sample aliquot (50 µL) for protein precipitation. The sample was vigorously shaken for 30 s and cooled at 4 °C for 30 min. The supernatant was transferred into an Eppendorf tube and methanol was removed *in vacuo*. The dried extract was dissolved in DMF (200 µL) and treated with the immobilized probe A.

### 5.5 Treatment of fecal metabolite extract

A suspension of immobilized probe A in DMF (100 µL) was added to the fecal extract solution (380 µL DMF). Triethylamine (60 µL) was added and the mixture was stirred at 30 °C for 22 h. The fecal extract solution was removed and the beads were washed with THF (2 x 200 µL) and resuspended in THF (300 µL THF). For the control experiment, the amine-derivatized beads (unmodified) were incubated with the fecal extract solution under the same reaction conditions.

### 5.6 Treatment of plasma metabolite extract

A suspension of immobilized probe A in DMF (100 µL) was added to the plasma extract solution (200 µL DMF). Triethylamine (60 µL) was added and the mixture was stirred at 30 °C for 22 h. The plasma extract solution was removed and the beads were washed with THF (2 x 200 µL) and resuspended in THF (300 µL THF). For the control experiment, the amine-derivatized beads (unmodified) were incubated with the plasma extract solution under the same reaction conditions.

## 5.7 Preparation of bacterial strain lysates and supernatants

*Salmonella enterica* serovar Typhimurium SL1344 (*Salmonella*), *Shigella flexneri* M90T (*Shigella*), and *Escherichia coli* DH10B (*E. coli*) were used as bacterial strains in this study. Each bacterium was inoculated in 10 mL Luria broth (LB) and grown for 16 h overnight at 37 °C. The bacteria in each overnight culture were pelleted by centrifugation (4 °C, 15 min, 20,000g). For each sample, 2 mL of the supernatant was diluted to 10 mL with mass spectrometry grade methanol. The remaining supernatant was removed, and 4 mL of ethanol:water (3:2) solution was added to the bacterial pellet. The pellet lysate mixtures were heated at 78 °C for 3 min with rigorous vortexing every minute, cooled, and subsequently cleared by centrifugation (4 °C, 15 min, 20,000g). The supernatant and pellet lysate samples were dried *in vacuo*. The dried samples were dissolved in dimethylformamide and treated with probe A.

In order to induce oxidative stress, *E. coli* DH10b was inoculated in 20 mL of Luria broth (LB) and grown for 16 h overnight at 37 °C. Subsequently, half of the culture was treated with hydrogen peroxide (H<sub>2</sub>O<sub>2</sub>) at a final concentration of 1 mM for 30 min at 37 °C, while the other half was left untreated and used as a control. Bacterial pellets were lysed and collected as specified above.

## 5.8 Cleavage of the bead-bound probe A

The THF suspension of the treatment and control beads were transferred to glass vials. Triphenylphosphine (97.0 µL, 12.9 mM in THF, 1.25 µmol) and 1,3-dimethylbarbituric acid (90.0 µL, 30.7 mM in THF, 2.76 µmol) solutions were added to the vial, followed by palladium (II) acetate solution (84.0 µL, 6.53 mM in THF, 549 nmol). The vials were sealed and a stream of nitrogen was passed through until approximately half the volume of the suspension remained. The vials were shaken using Thermomixer (700 rpm) at 25 °C for 16 h. The supernatants were separated from the beads using magnetic separation. The supernatants were concentrated *in vacuo*. The residues were redissolved in LCMS-grade methanol (30 µL) and triphenylphosphine and triphenylphosphine oxide were precipitated through the addition of water (120 µL). The suspension was centrifuged in a benchtop centrifuge (12,000 g, 5 min). The supernatants were transferred into Eppendorf tubes and concentrated *in vacuo*. The residues were dissolved in 100 µL of LCMS-grade methanol, diluted to 1:1 with 5% v/v acetonitrile/water and analyzed by UHPLC-MS.

### 5.9 Preparation of probe-conjugated thio-intermediates TCP1-TCP20

To the simplified probe **2** (0.2 mg, 1 equiv.) in DMF (200  $\mu$ L) was added the thiol **T1-T20** (10 equiv.) either dissolved in water or DMF (100  $\mu$ L). Potassium carbonate (20 equiv.) in water (100  $\mu$ L) or trimethylamine (80 equiv.) was added. The reaction vials were sealed under nitrogen and stirred overnight at room temperature or 28 °C. An aliquot (5  $\mu$ L) was diluted to 100  $\mu$ L with 5% v/v acetonitrile/ water and analyzed by UHPLC-MS.

### 5.10 Preparation of probe-conjugated standards TC1-TC20

After confirmation of the successful conjugation under **5.9**, trifluoroacetic acid (100  $\mu$ L) was added to each reaction mixture (where conjugated using  $K_2CO_3$ ) and stirred overnight at room temperature. The reaction mixture was concentrated *in vacuo*. An aliquot (5  $\mu$ L) of the reaction mixture was diluted to 50  $\mu$ L with LCMS-grade methanol. An aliquot (10  $\mu$ L) of this solution was further diluted to 60  $\mu$ L with 5% v/v acetonitrile/ water and analyzed by UHPLC-MS. This sequence of dilution was important for obtaining a clear sample solution.

### 5.11 Stability of thiol conjugates under Pd(0) conditions

The thiol conjugates **TC1- TC3**, **TC5**, **TC7**, **TC10**, **TC13** and **TC19** prepared above were incubated with Pd(0) reagents according to the method described in **5.8** and analyzed by UHPLC-MS.

### 5.12 Chemoselectivity test

Compound **2** (0.2 mg, 1 equiv.) or iodoacetamide (0.2 mg, 1 equiv.) was incubated with *N*-acetyl-L-cysteine **T2** (0.6 mg, 10 equiv.), L-serine (0.4 mg, 10 equiv.), L- lysine (0.6 mg, 10 equiv.) and potassium carbonate (0.5 mg, 10 equiv.) in 50 % DMF/H<sub>2</sub>O (0.8 mL) at 28 °C for 22 h. The reaction was analyzed using UHPLC-MS for the formed conjugates.

### 5.13 LOD experiment

Synthetic conjugated thiol **TC11** was prepared in a solution of water and acetonitrile (95:5 v/v) at a range of concentrations (5  $\mu$ M, 500 nM, 50 nM, 5 nM, 0.5 nM) before being submitted for UHPLC-MS analysis. The measurement was based on the conventional concepts that signal to noise ratios are at least higher than 3 corresponding to Limit of Detection (LOD). The signal to noise ratios were calculated according to European Pharmacopoeia guidelines by using MassLynx 4.1.

## **6. Ethical approval**

Patient fecal samples were obtained in accordance with the World Medical Association Declaration of Helsinki and all patients gave written informed consent. Approval for the study was obtained from the ethical committee at Karolinska Institutet Hospital (Ethical approval number: Dnr 2017/290-31). Fecal samples were collected using routine clinical collection protocols and all patient codes have been removed in this publication. All samples were stored at -80 °C. Metadata of the patients can be found in Table S7.

## 7. References

- (1) Tokunaga, K.; Sato, M.; Kuwata, K.; Miura, C.; Fuchida, H.; Matsunaga, N.; Koyanagi, S.; Ohdo, S.; Shindo, N.; Ojida, A. Bicyclobutane Carboxylic Amide as a Cysteine-Directed Strained Electrophile for Selective Targeting of Proteins. *J. Am. Chem. Soc.* **2020**, *142* (43), 18522-18531. DOI: 10.1021/jacs.0c07490.
- (2) Lin, W.; Conway, L. P.; Vujasinovic, M.; Löhr, J. M.; Globisch, D. Chemoselective and Highly Sensitive Quantification of Gut Microbiome and Human Metabolites. *Angew. Chem. Int. Ed.* **2021**, *60* (43), 23232–23240. DOI: DOI: 10.1002/anie.202107101.
- (3) Gunsalus, I. C.; Barton, L. S.; Gruber, W. Biosynthesis and Structure of Lipoic Acid Derivatives. *J. Am. Chem. Soc.* **1956**, *78* (8), 1763–1766. DOI: 10.1021/ja01589a079.
- (4) Zhao, Y.; Wang, H.; Xian, M. Cysteine-Activated Hydrogen Sulfide (H<sub>2</sub>S) Donors. *J. Am. Chem. Soc.* **2011**, *133* (1), 15-17. DOI: 10.1021/ja1085723.

## 8. NMR spectra

<sup>1</sup>H NMR (400 MHz, CDCl<sub>3</sub>) of reduced lipoic acid

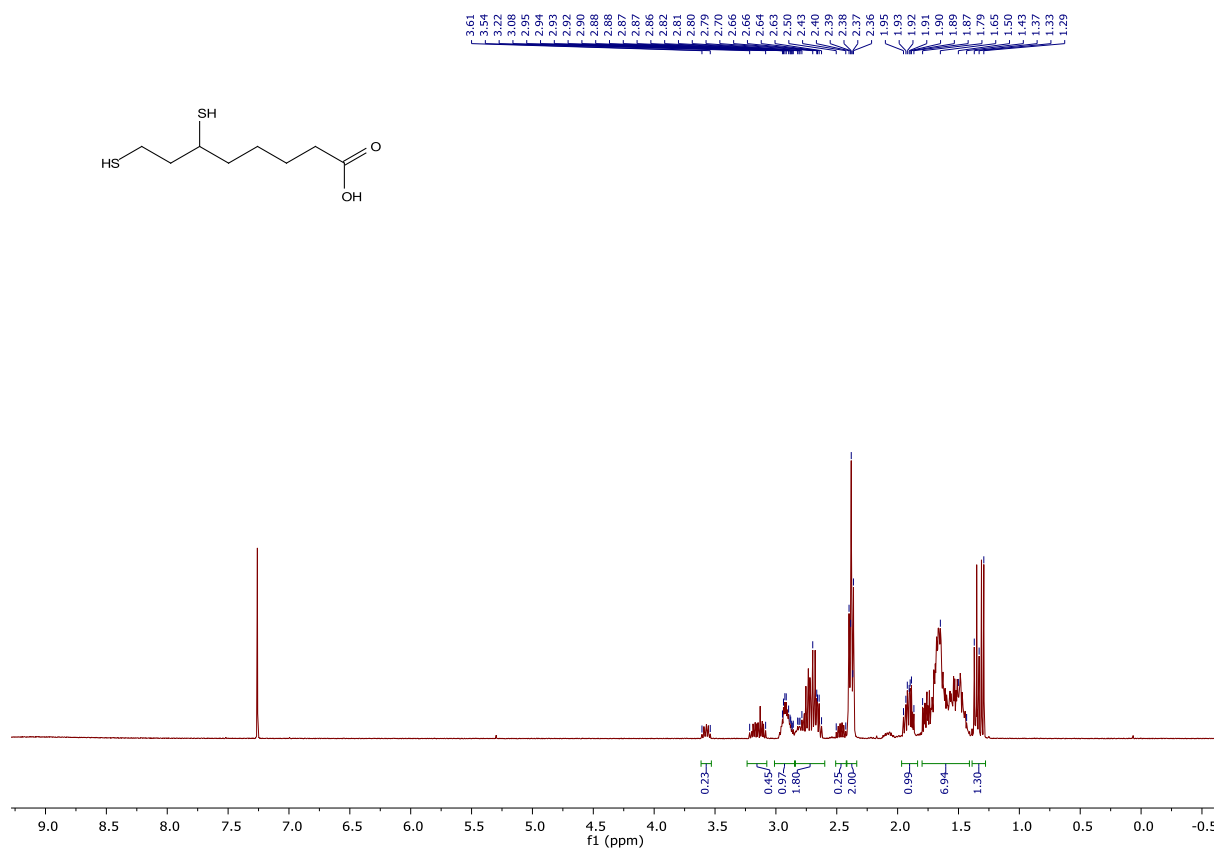



<sup>1</sup>H NMR (400 MHz, (CD<sub>3</sub>)<sub>2</sub>SO) of TCP11

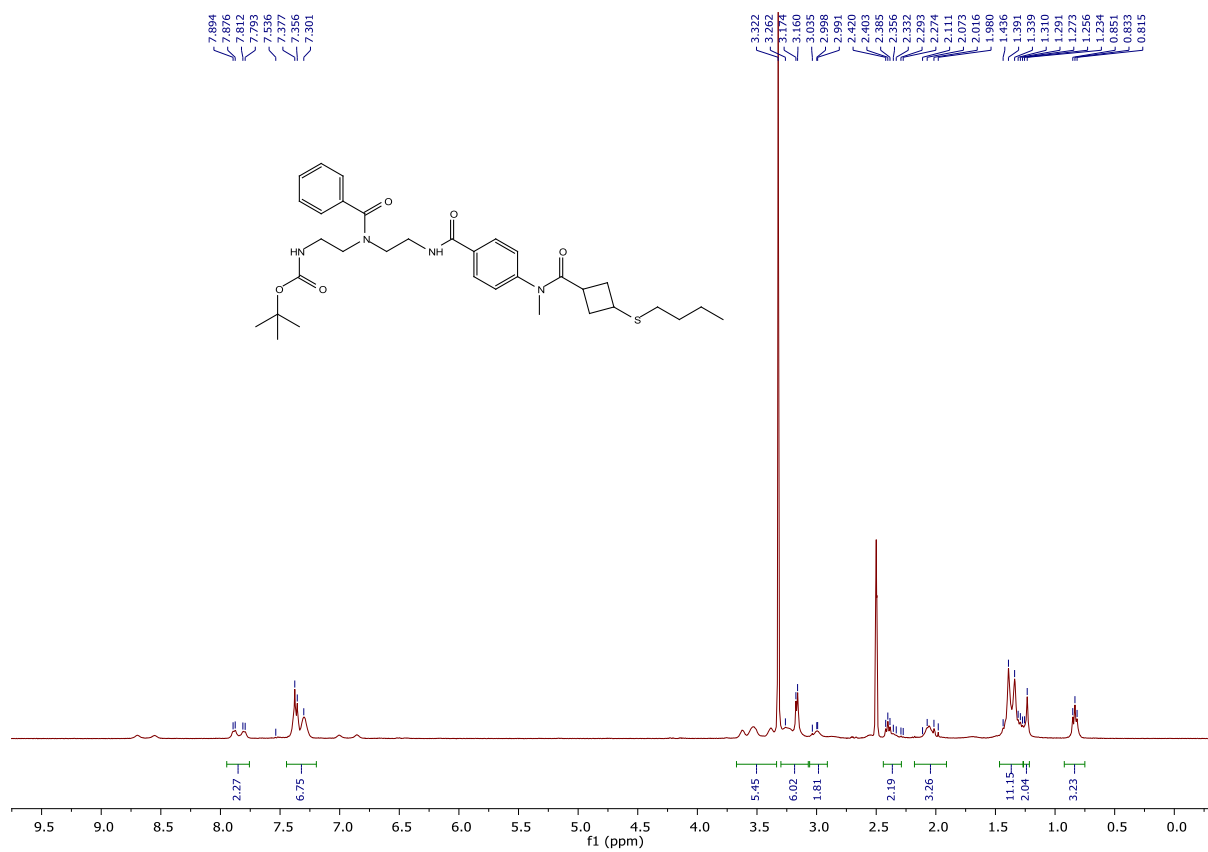

<sup>1</sup>H NMR (400 MHz, CDCl<sub>3</sub>) of TCP11

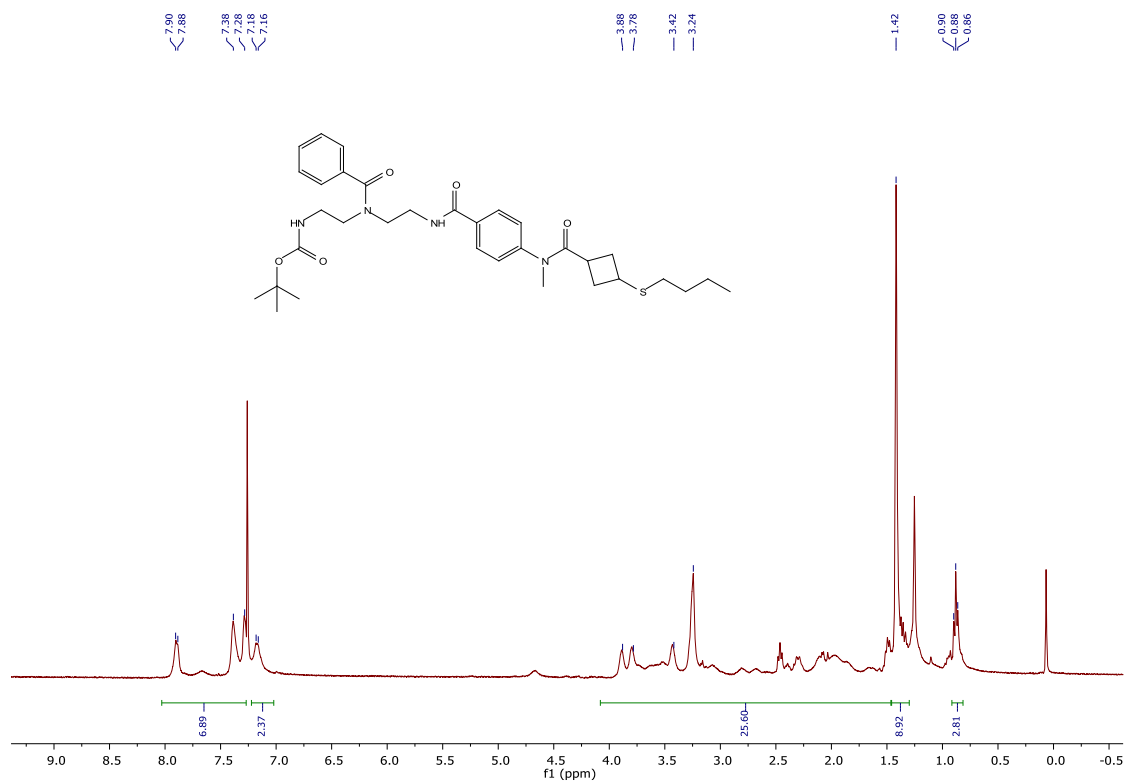

$^{13}\text{C}$  NMR (100 MHz,  $\text{CDCl}_3$ ) of **TCP11**

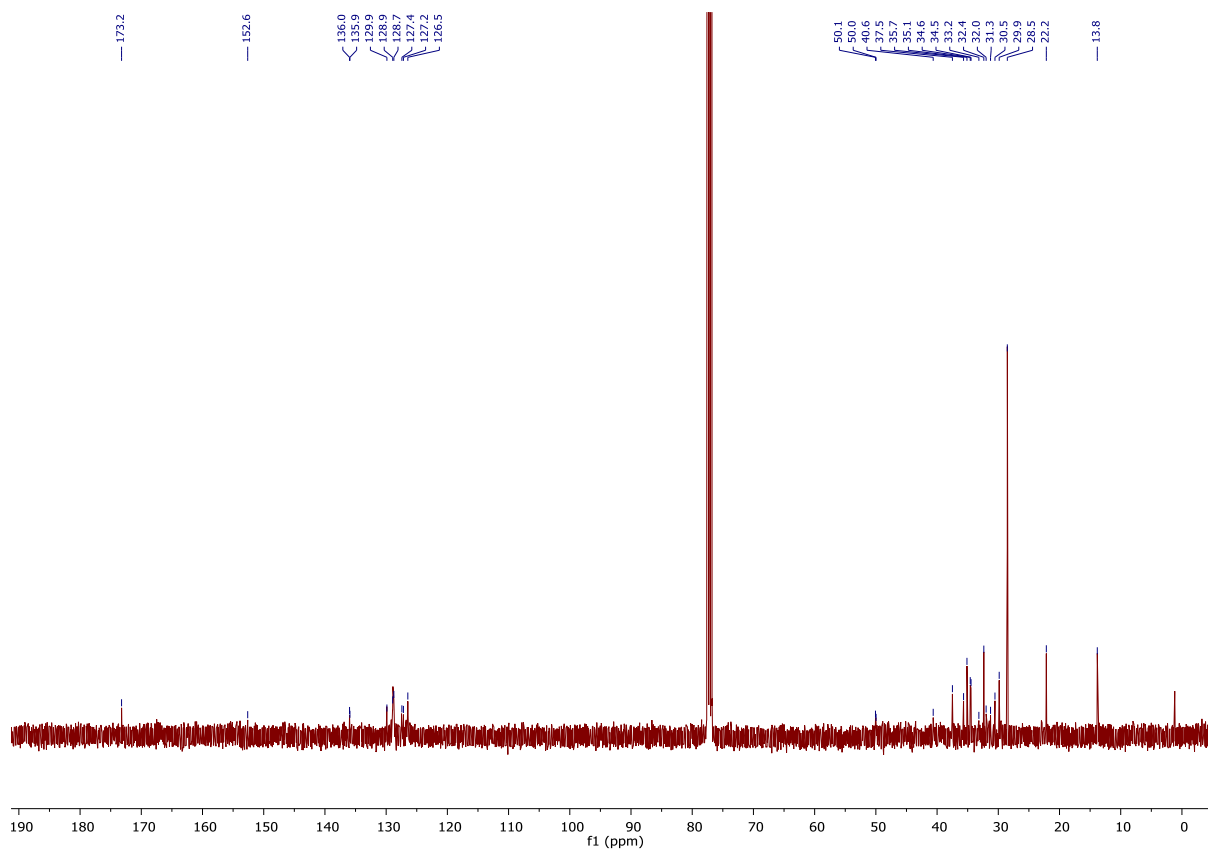

$^1\text{H}$  NMR (400 MHz,  $\text{CDCl}_3$ ) of **15**

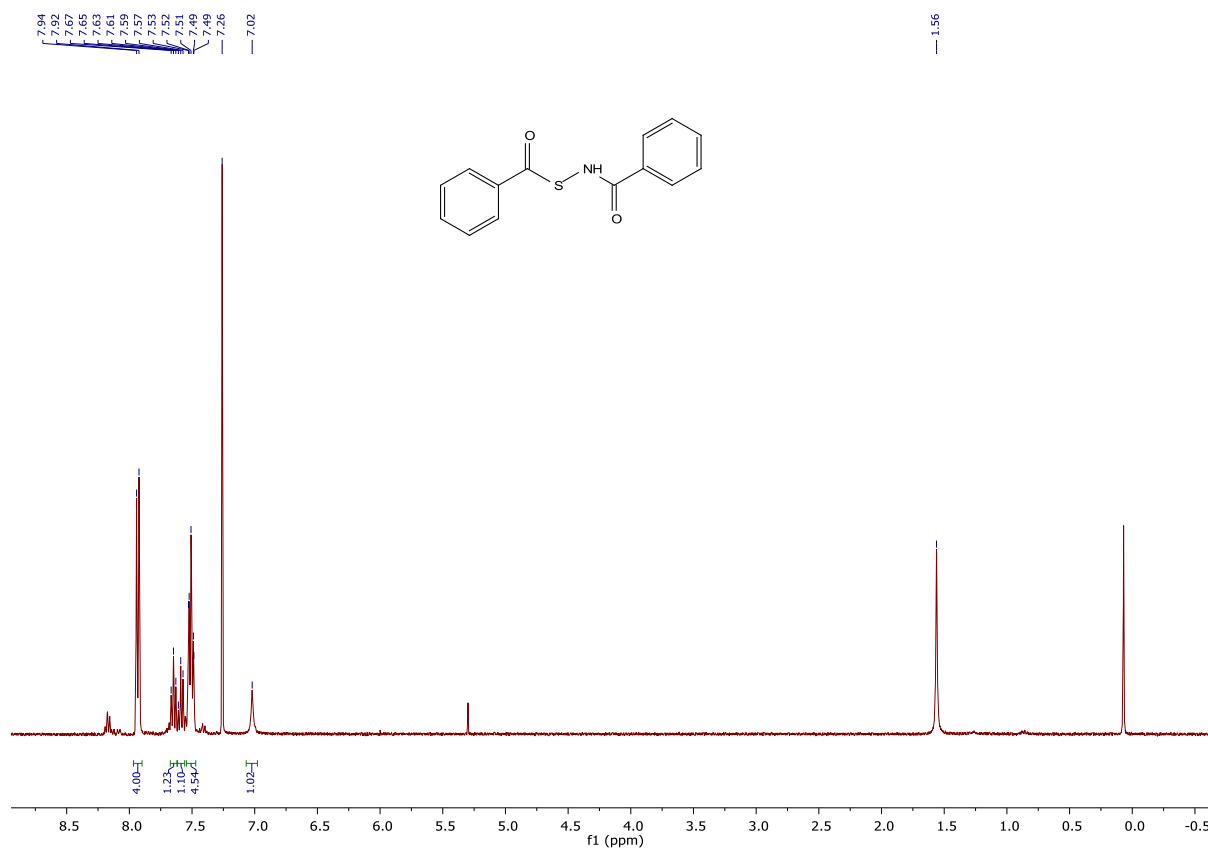

$^1\text{H}$  NMR (400 MHz,  $\text{CDCl}_3$ ) of **5**

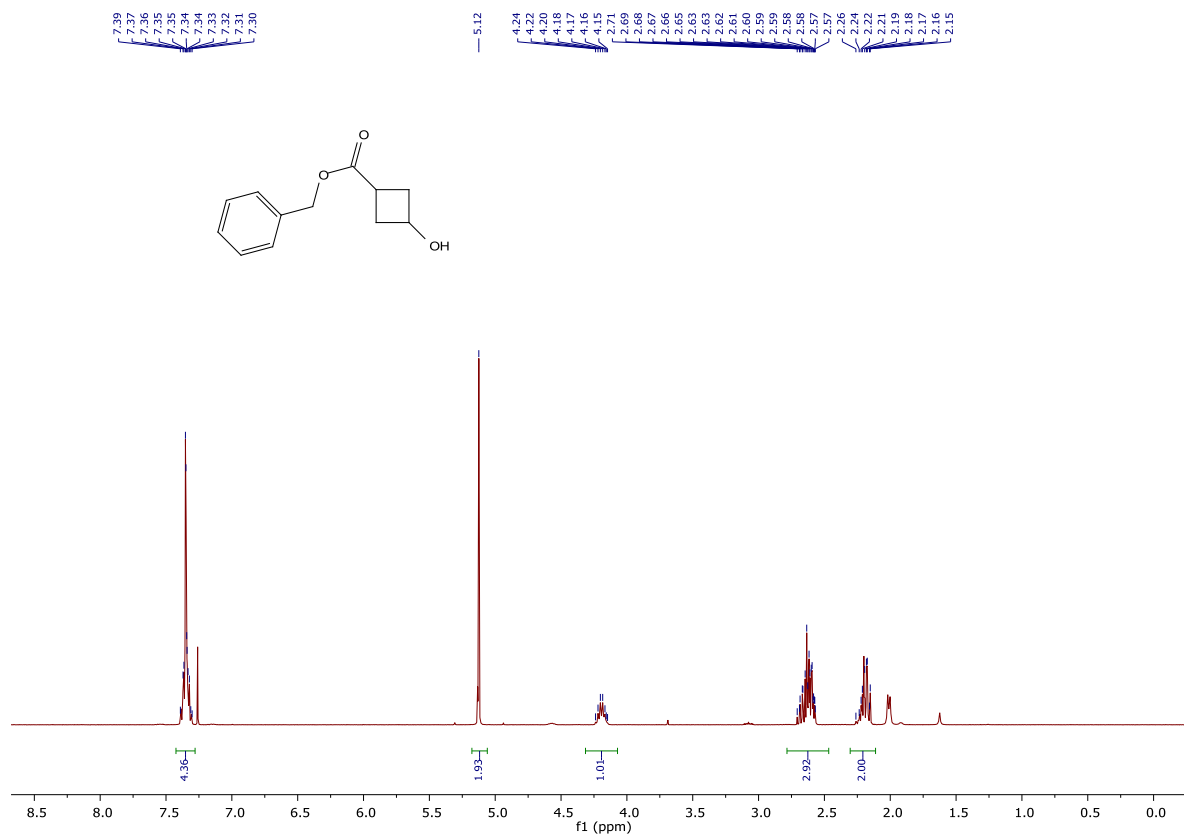

$^1\text{H}$  NMR (400 MHz,  $\text{CDCl}_3$ ) of **6**

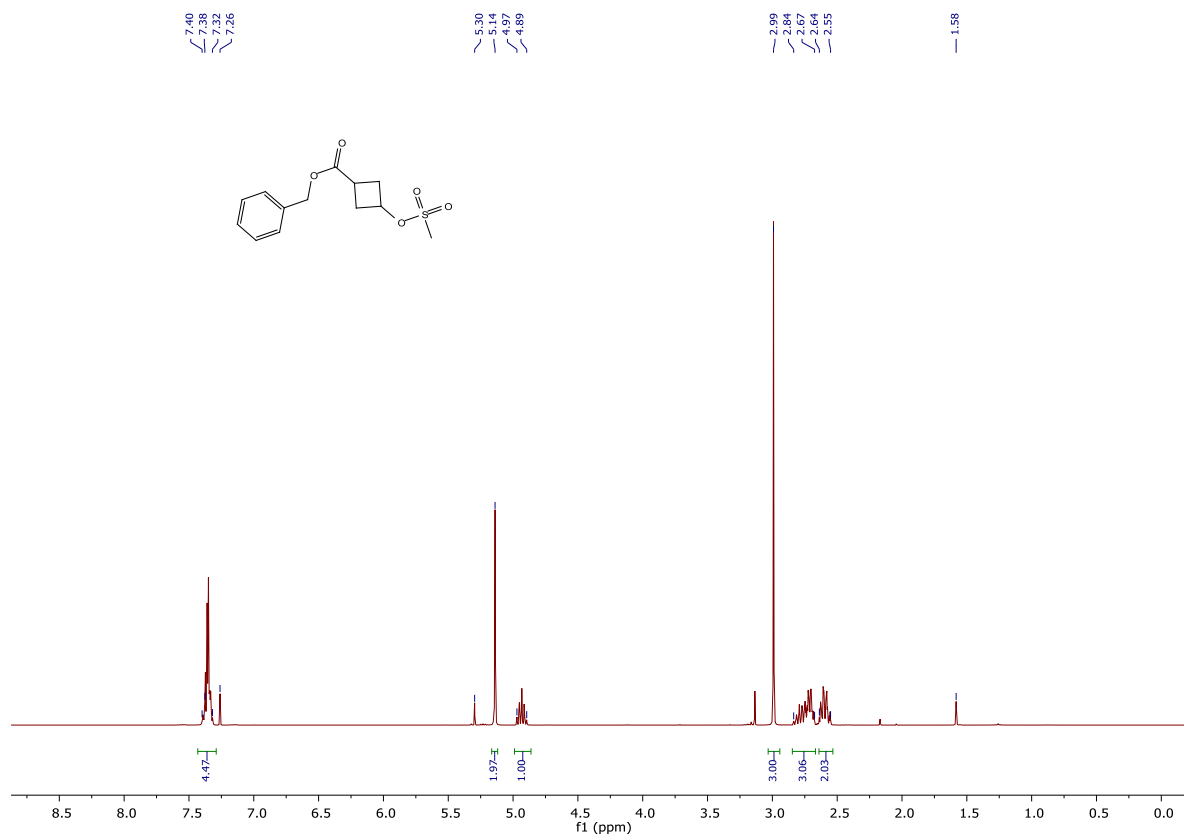

$^1\text{H}$  NMR (400 MHz,  $\text{CDCl}_3$ ) of the diastereomer mixture of **7**

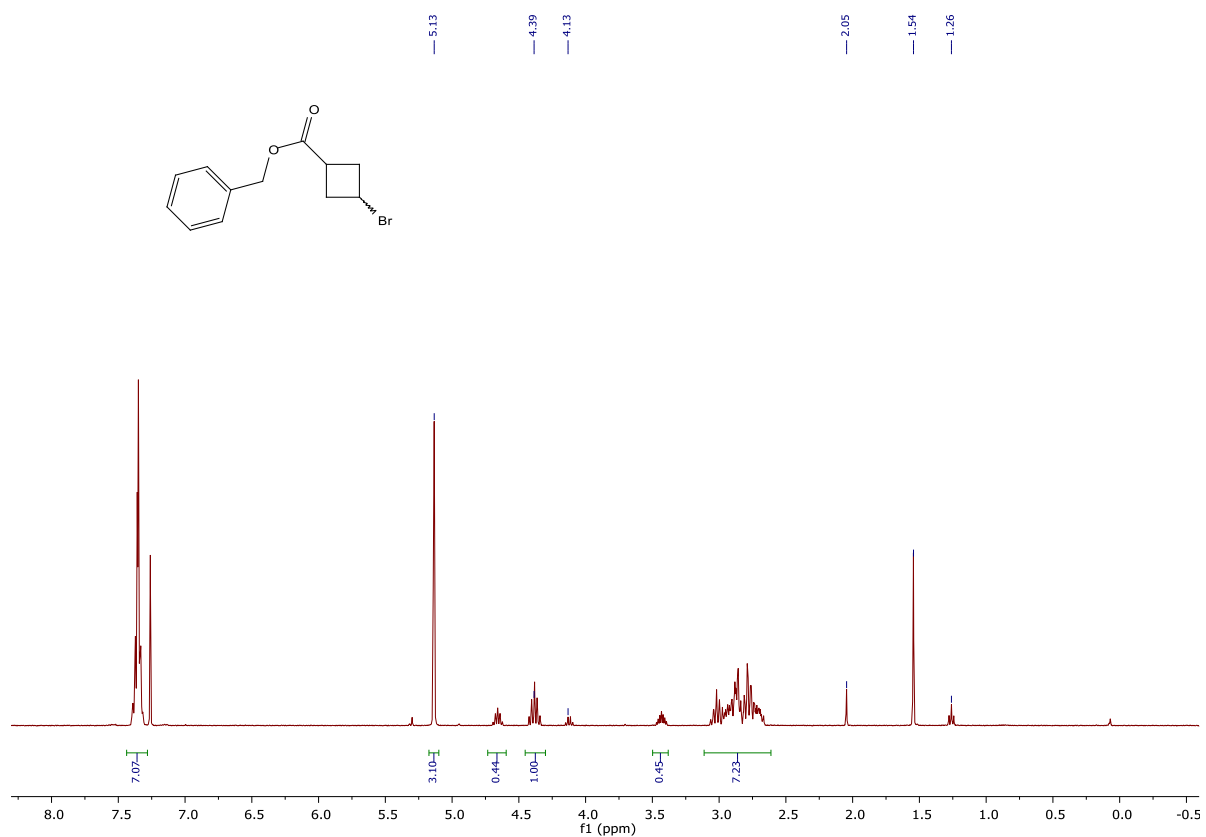

$^1\text{H}$  NMR (400 MHz,  $\text{CDCl}_3$ ) of major diastereomer of **7**

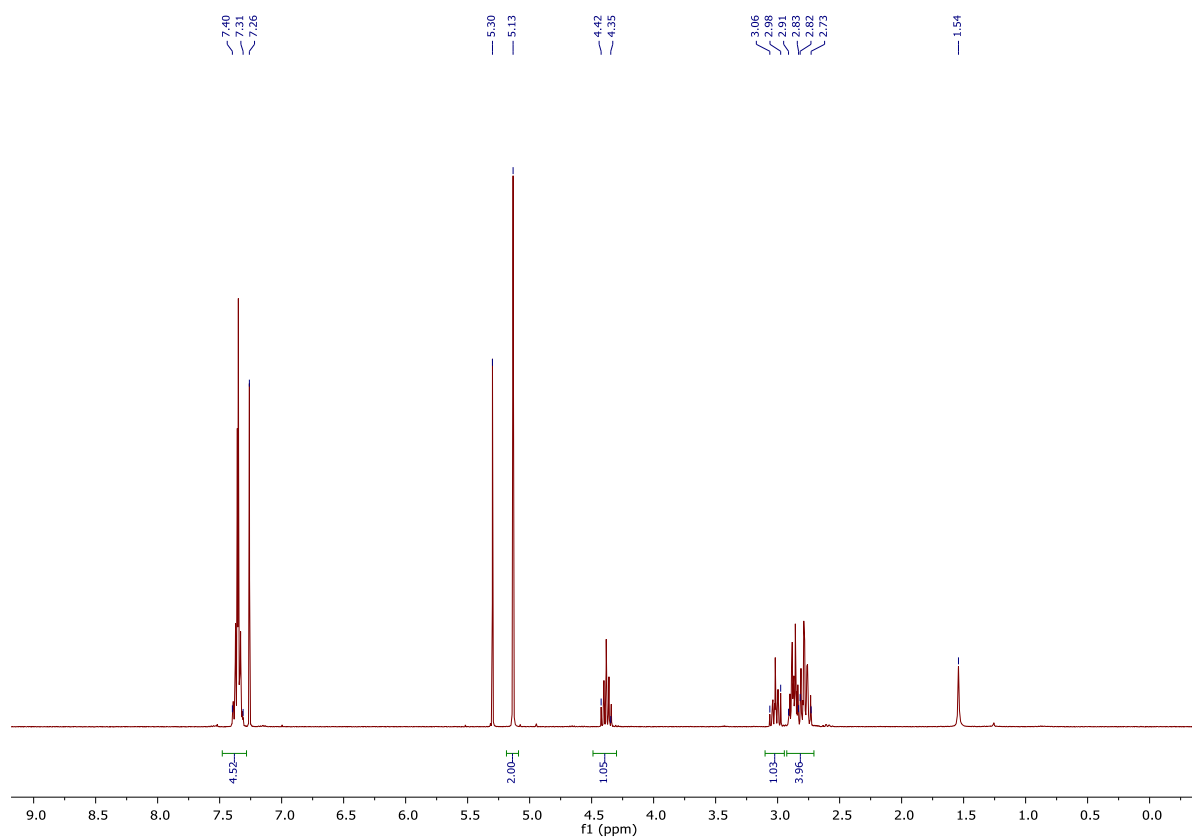

$^1\text{H}$  NMR (400 MHz,  $\text{CDCl}_3$ ) of minor diastereomer of **7**

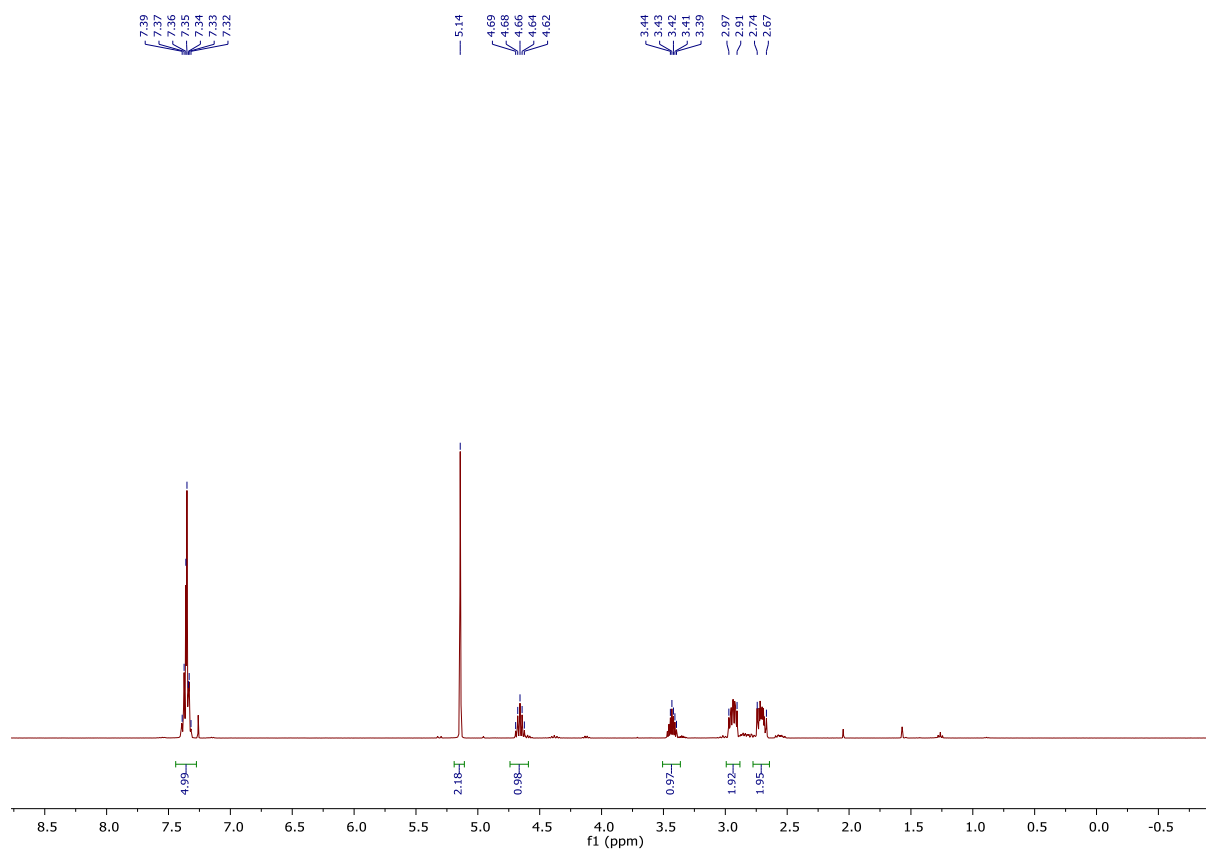

$^1\text{H}$  NMR (100 MHz,  $\text{CD}_3\text{OD}$ ) of **8**

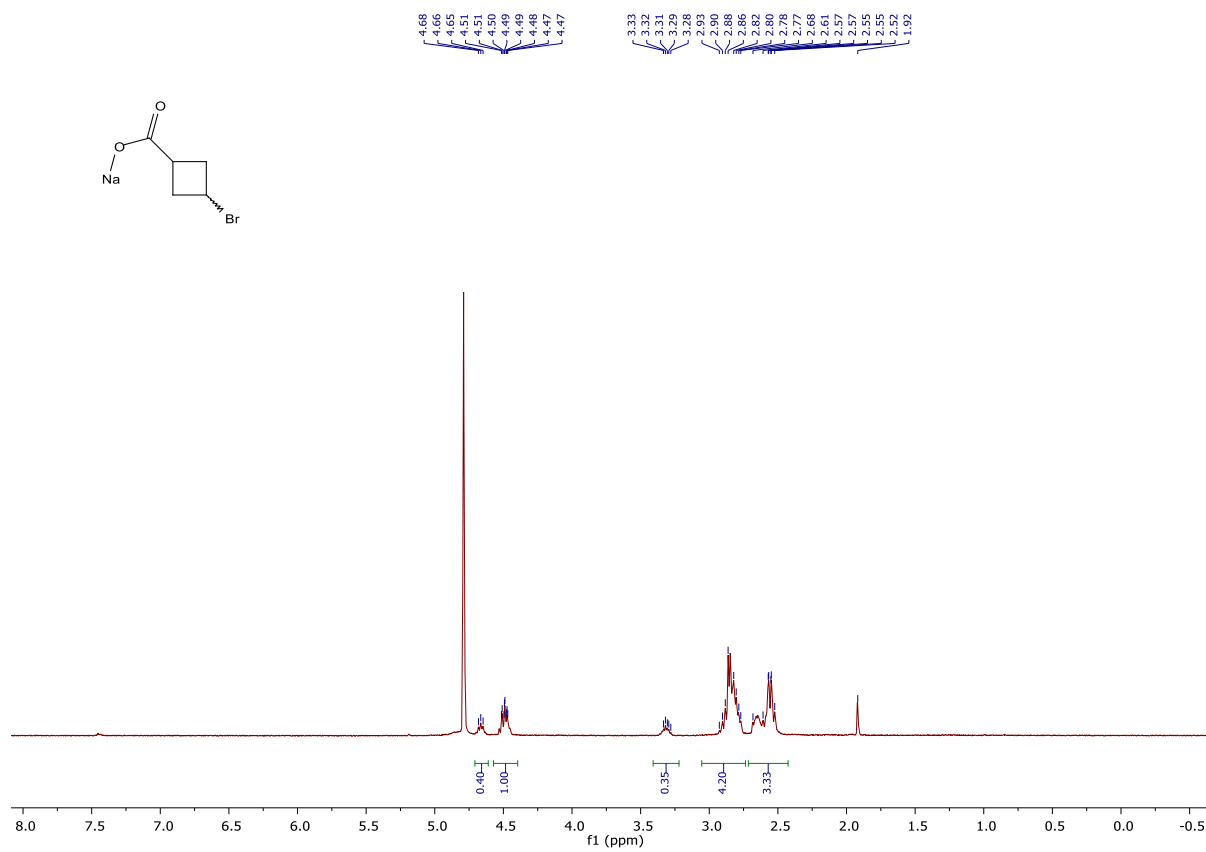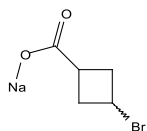

$^1\text{H}$  NMR (400 MHz,  $\text{CDCl}_3$ ) of **10**

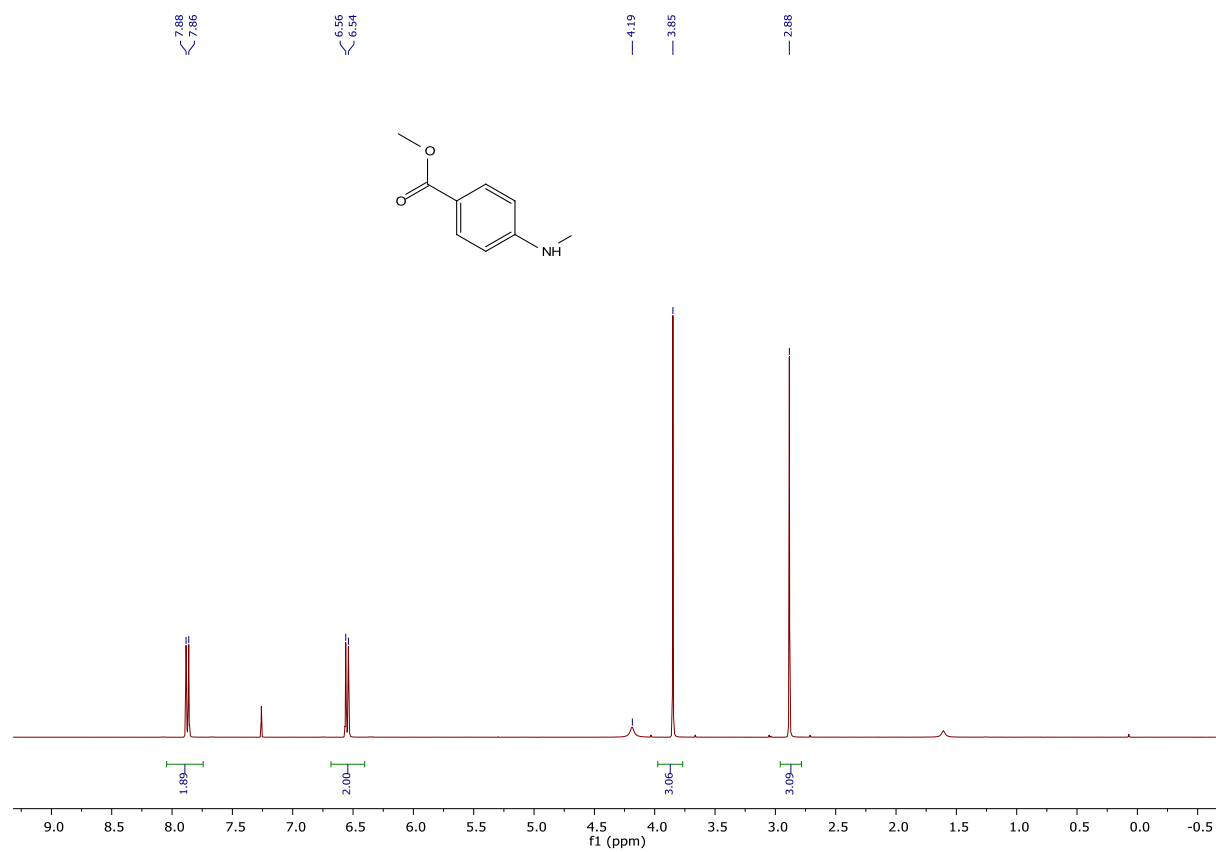

$^1\text{H}$  NMR (400 MHz,  $\text{CDCl}_3$ ) of **9**

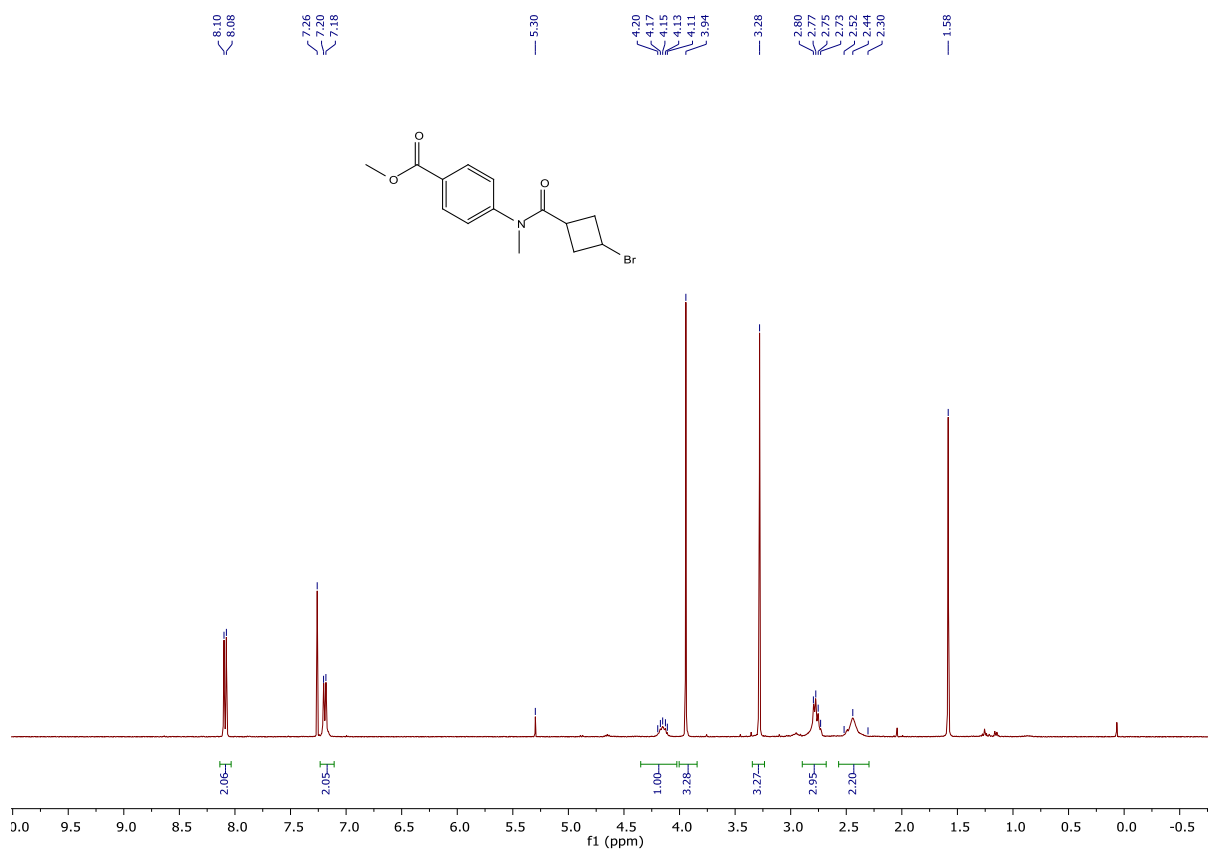

$^{13}\text{C}$  NMR (100 MHz,  $\text{CDCl}_3$ ) of **9**

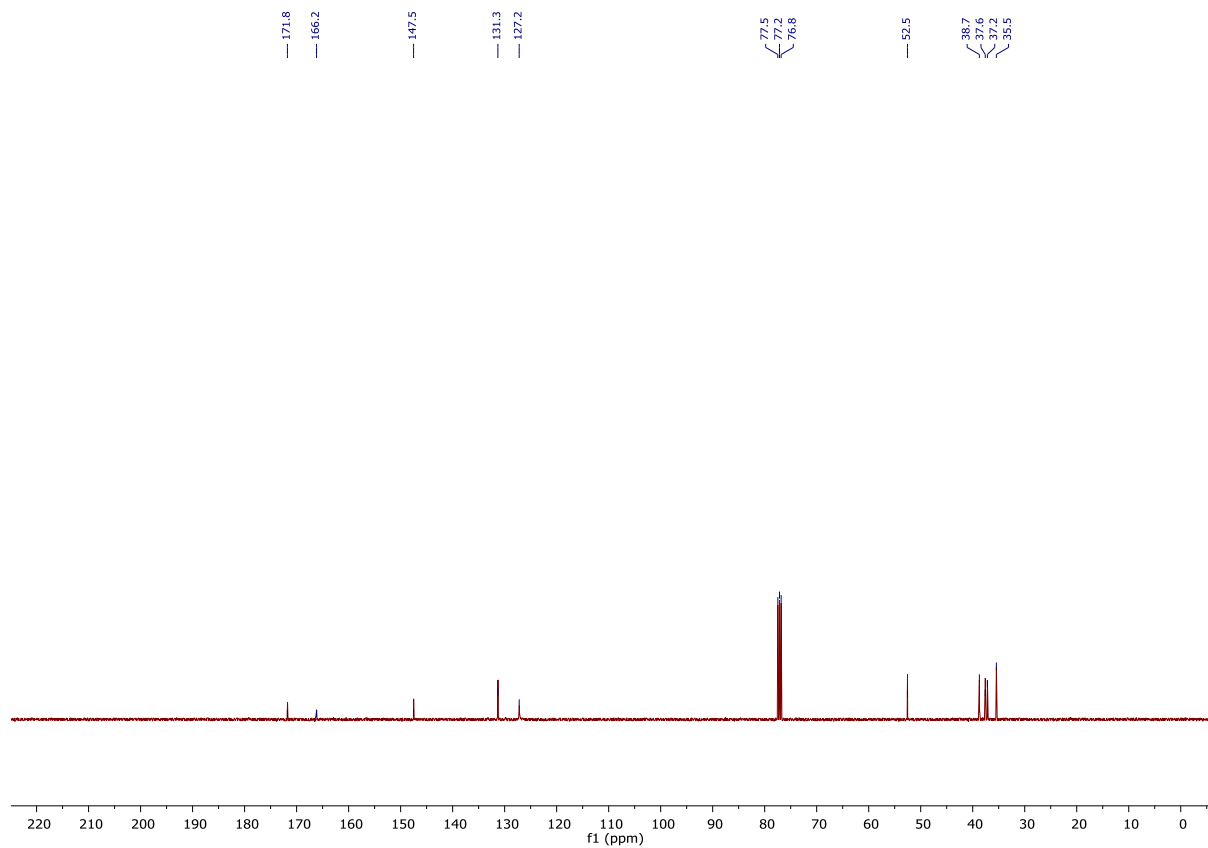

$^1\text{H}$  NMR (400 MHz,  $\text{CDCl}_3$ ) of **11**

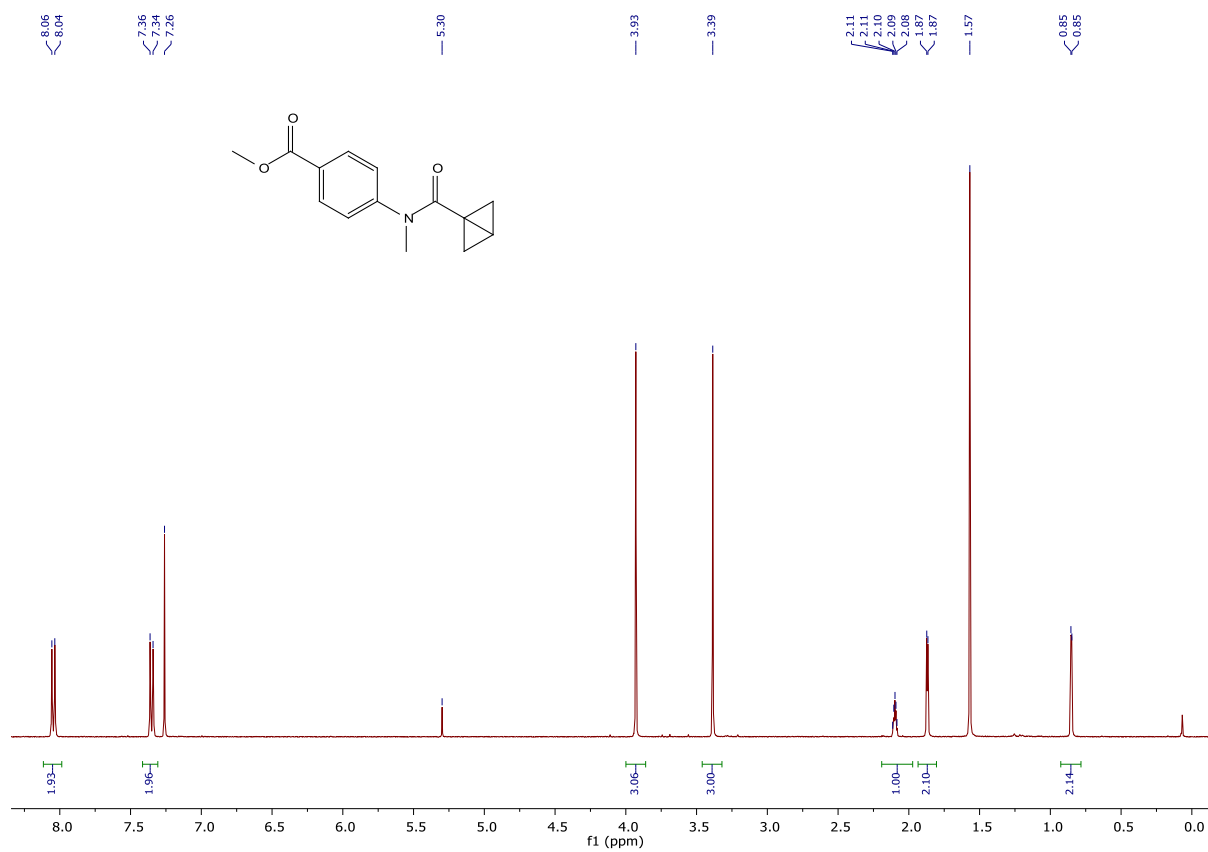

$^{13}\text{C}$  NMR (100 MHz,  $\text{CDCl}_3$ ) of **11**

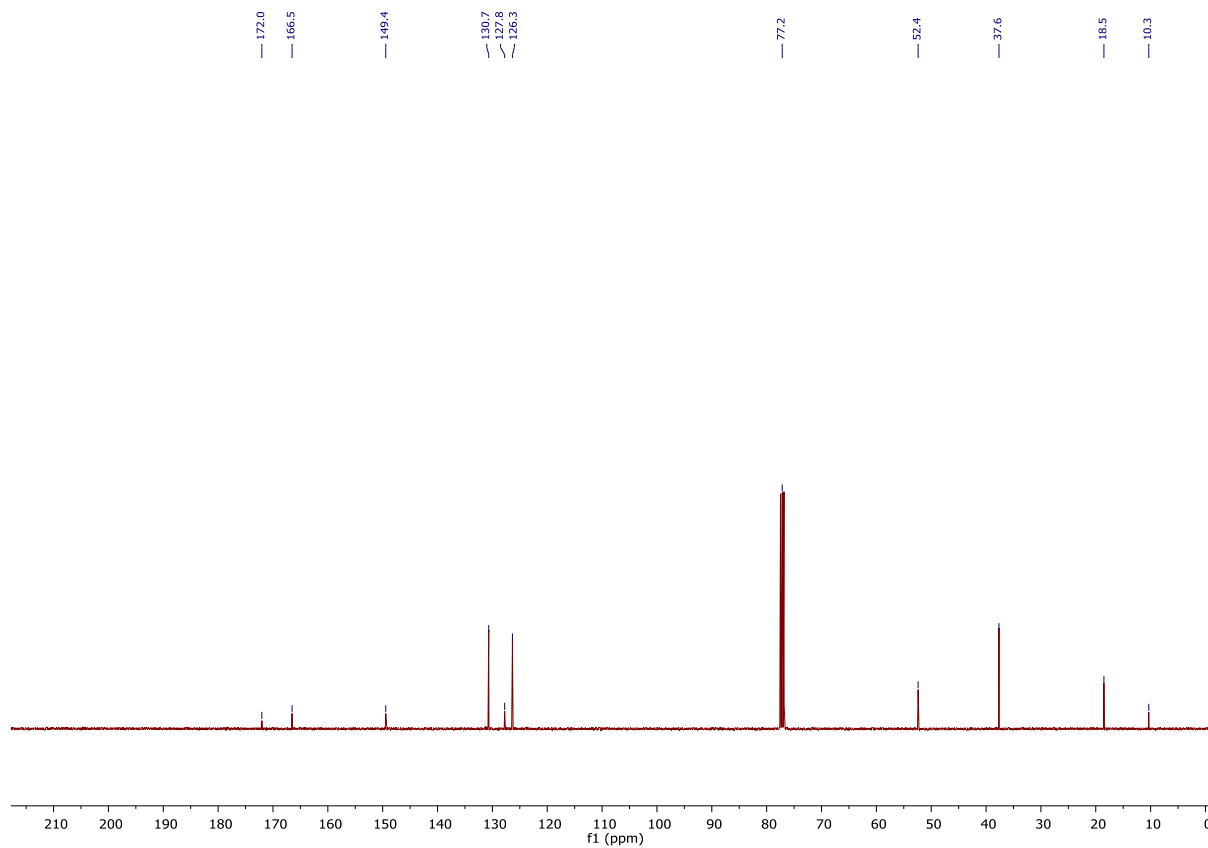



$^1\text{H}$  NMR (400 MHz,  $\text{CD}_3\text{OD}$ ) of **12**

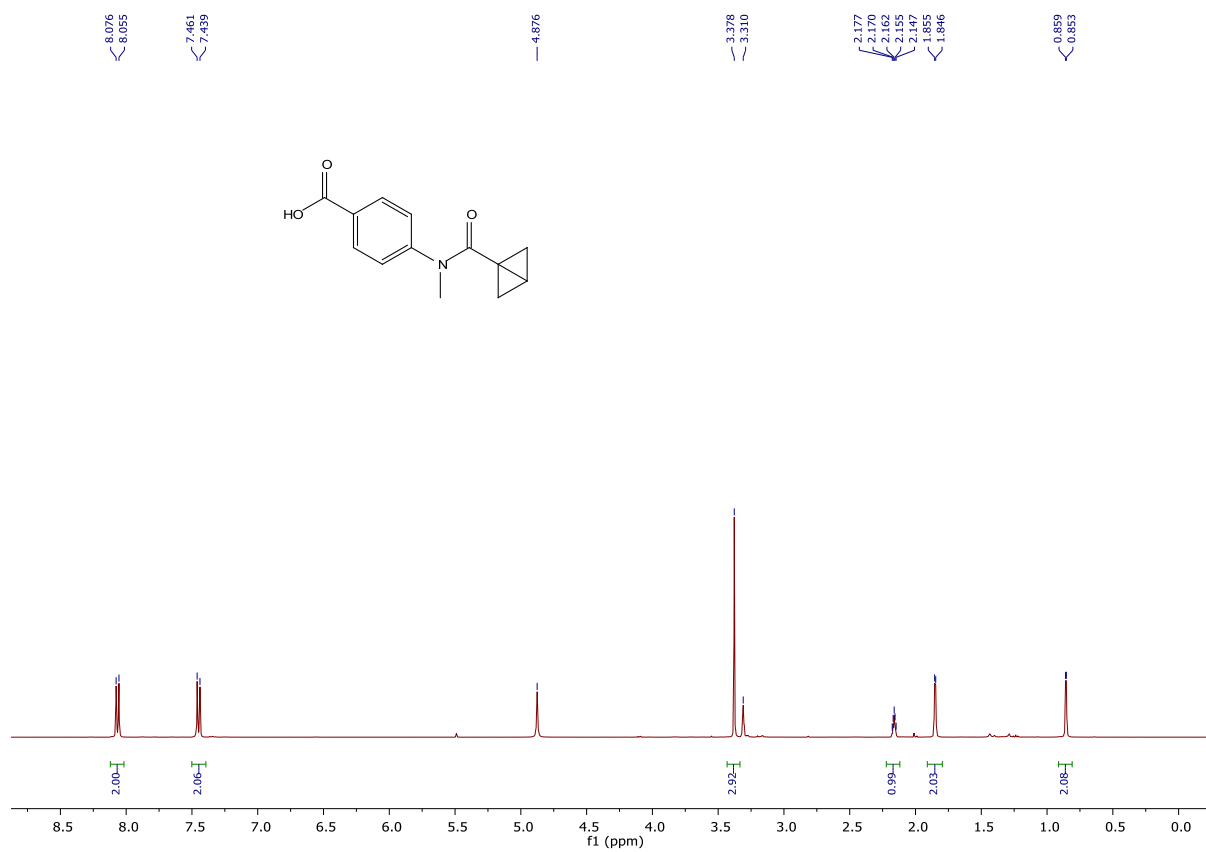

$^{13}\text{C}$  NMR (100 MHz,  $\text{CD}_3\text{OD}$ ) of **12**

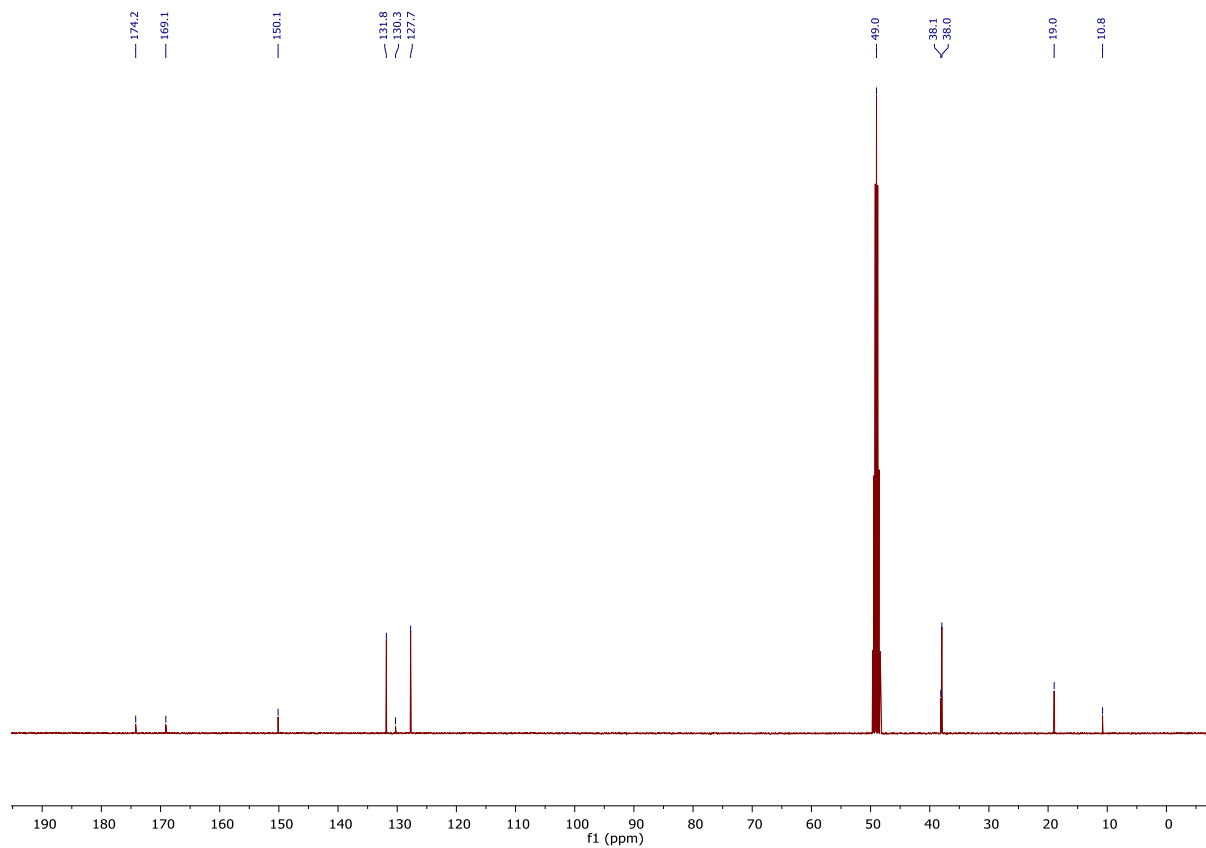

$^1\text{H}$  NMR (400 MHz,  $\text{CDCl}_3$ ) of **2**

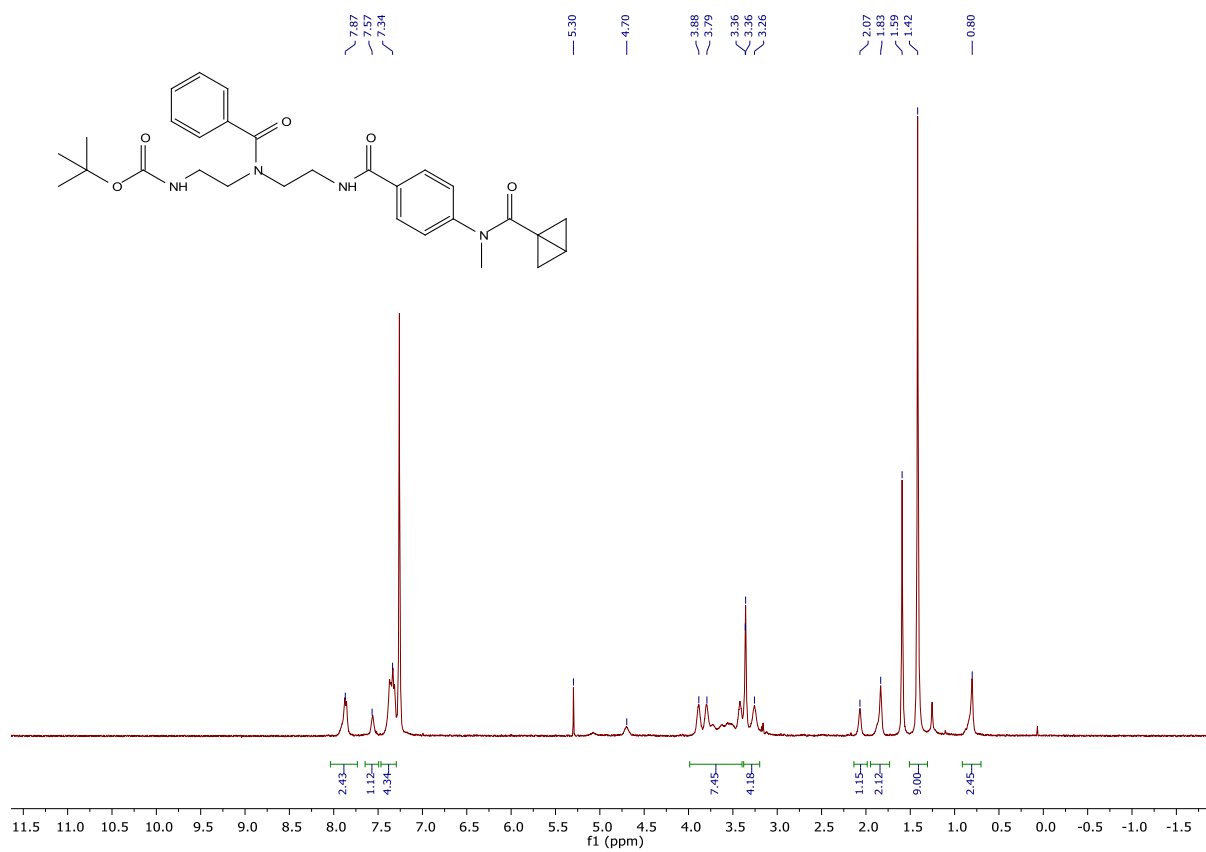

$^{13}\text{C}$  NMR (100 MHz,  $\text{CD}_3\text{OD}$ ) of **2**

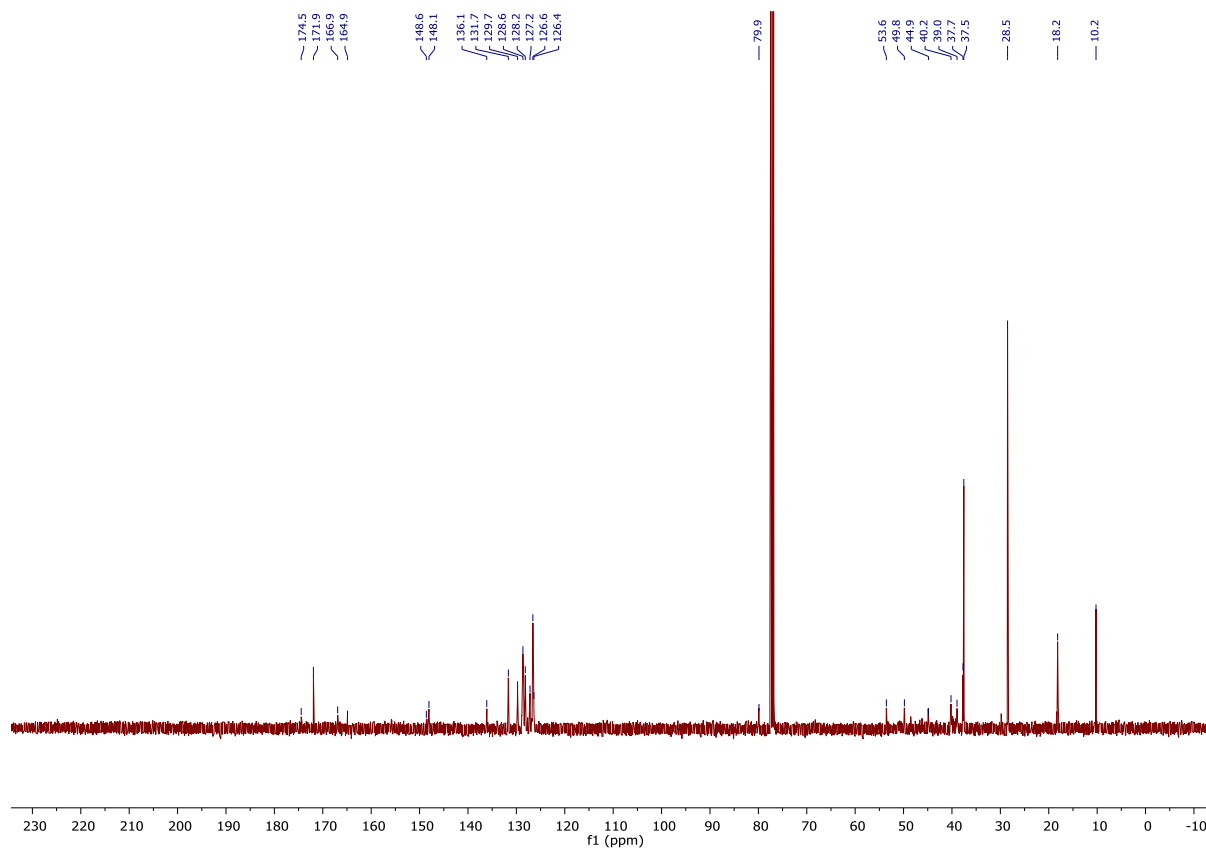

$^1\text{H}$  NMR (400 MHz,  $\text{CDCl}_3$ ) of **1a**

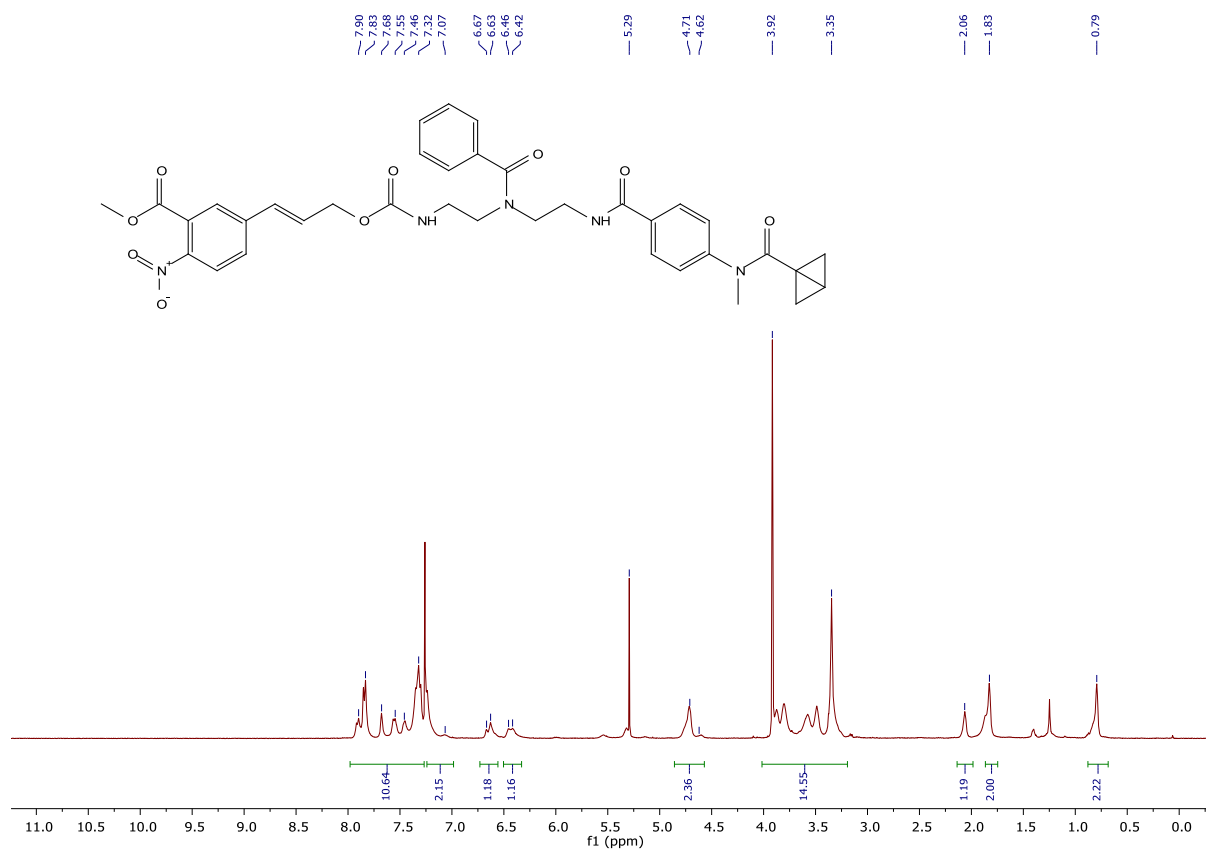

$^{13}\text{C}$  NMR (100 MHz,  $\text{CDCl}_3$ ) of **1a**

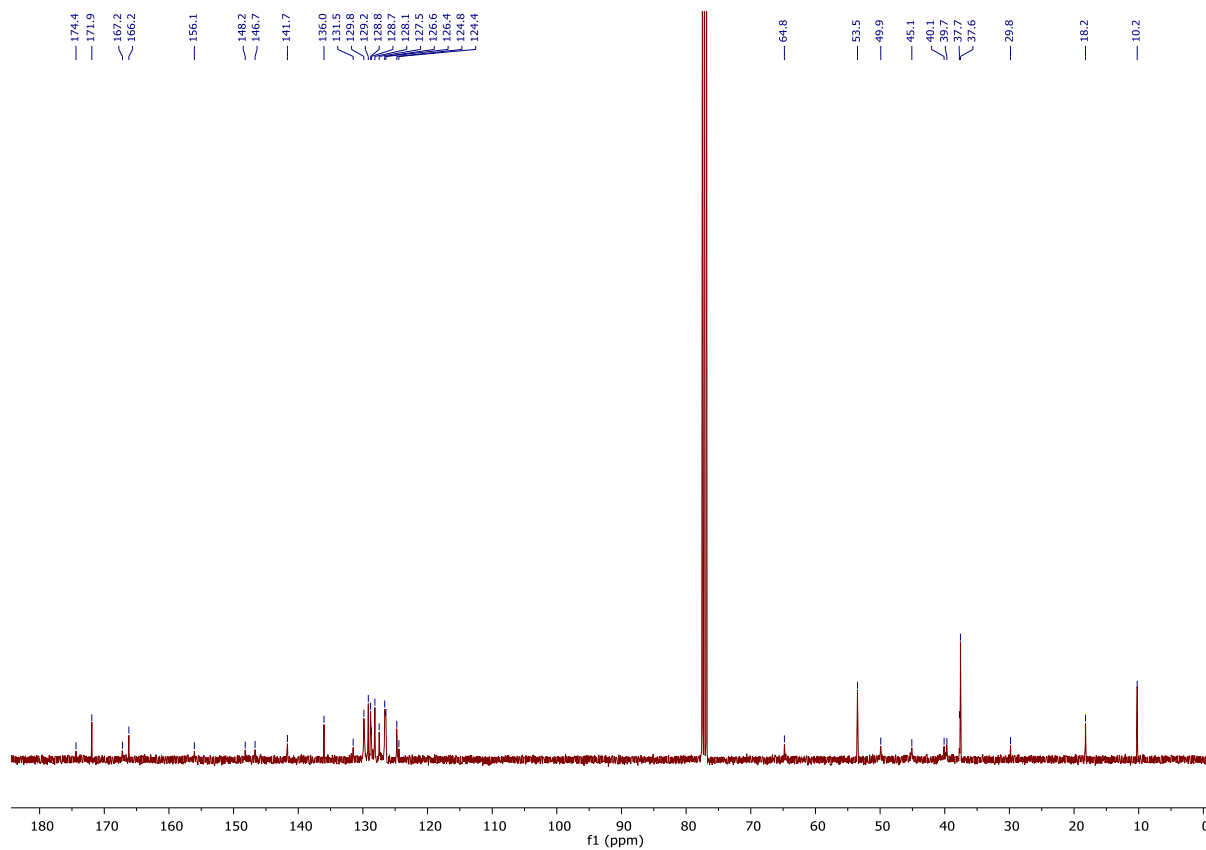

<sup>1</sup>H NMR (400 MHz, CD<sub>3</sub>OD) of **1**

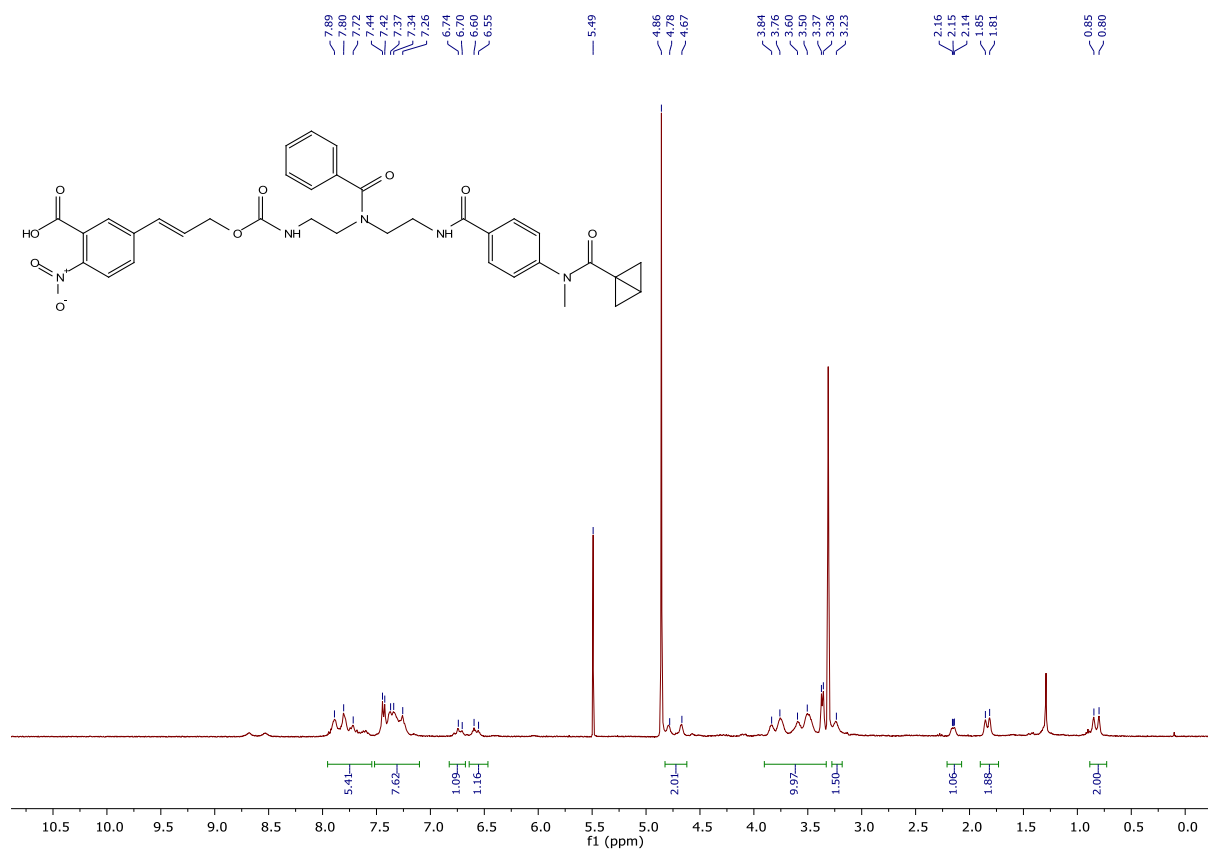

Supplement: d3sc00224a1.pdf [file d3sc00224a1.pdf]
